# Supplementary material for: Quantifying key drivers of marine pyrite burial flux and isotopic composition
Source: Research Square preprint supplement (doi:10.21203/rs.3.rs-4788953/v1), 2024-11-01
Supplement: Supplementary file 1 [file 1002.xlsx]

## Sheet: Sheet1
reference	latitude_dd	longitude_dd	water_depth_m	depth_cm	age_yr	porosity_vol_	SO4_mM	H2S_mM	CH4_mM	S_py_wt_	S_AVS_wt_	S0_wt_	TOC_wt_	Fe_HR_wt_	Fe_tot_wt_	d34S_SO4	d34S_H2S	d34S_py	lnSRR_molL_1d_1	lnMOR_molL_1d_1	sed_rate_cmky
Werne2003	10.7234	-65.1885	900	0.771667												22.2473					30
				0.931677			27.6894			1.29811											30
				3.7325				0													30
				4.65839			27.3864			1.26642											30
				6.17284			26.8561			1.13962							-32.5216				30
				7.46501				2.12121													30
				8.64198													-33.098				30
				9.7816													-29.0424				30
				10.3639												23.9839					30
				12.1306				0.113636													30
				13.055			27.3864			1.26642				1.30181							30
				14.8148													-31.8876				30
				17.0807			27.0833			1.33887											30
				19.0309			25.4167	2.15909		1.2166						24.8542	-27.8831				30
				20.9877													-33.8473				30
				24.2613				1.81818													30
				25.9259													-33.5014				30
				26.3975			26.4015			1.62415											30
				30.1736			25.5682			1.37509						26.0145	-32.6945				30
				31.7263				0.0378788													30
				33.3333													-32.9251				30
				34.1622										1.40381							30
				36.9565			25.4924			1.21208											30
				39.1913				2.34848													30
				40.0838												26.5975					30
				41.3043			24.5076			1.20755							-32.8098				30
				44.4781				0									-27.8665				30
				45.6522			25.2652			1.37509											30
				51.3219				5.18939													30
				52.6185										1.31471							30
				54.321			23.3712			1.37962						27.7602	-32.464				30
				56.8962													-29.5872				30
				63.6408				3.56061						1.35079							30
				66.1491			23.2197			1.49736											30
				72.7838				4.50758													30
				74.2123												30.0789	-26.4056				30
				75.3086			22.9924			1.27547							-32.8674				30
				83.0482				6.06061													30
				85.4037			22.0833			1.60151											30
				92.0857												31.8196					30
				94.0541				5.60606									-26.9687				30
				95.3416			20.7197			1.42491											30
				96.2963													-31.3112				30
				101.553			19.7348			1.44302											30
				104.51				4.50758													30
				107.407													-31.7723				30
				109.416												33.8485					30
				112.908				5.87121													30
				115.121			20.947			1.41585							-26.3782				30
				123.173				6.70455													30
				124.691													-33.2709				30
				125.155			19.2045			1.61509											30
				129.888										1.37031							30
				134.202				6.74242								34.4415					30
				134.931													-24.3476				30
				136.335			18.5227			1.40679											30
				141.975													-33.8473				30
				142.768				4.05303													30
				146.483										1.31698							30
				147.516			17.9924			1.56981											30
				153.033			17.5379	4.77273		1.61509											30
				154.726													-21.1644				30
				156.495												36.1855					30
				168.896				7.15909													30
				169.136													-32.9251				30
				171.118			17.4621			1.56528											30
				173.036										1.55046							30
				181.026				7.42424									-32.4063				30
				184.489			16.553			1.5834							-22.009				30
				186.247												36.2055					30
				198.756			15.3409	6.25		1.49736											30
				213.491				8.93939								38.5292					30
				213.975			15.3409			1.44302											30
				214.234										1.44997			-21.4127				30
				228.616				5.7197													30
				229.503			14.5833			1.55623							-33.6743				30
				244.451				6.93182								41.1436					30
				245.031			13.3712			1.63321							-24.5611				30
				257.543				5.68182													30
				259.938			13.0682			1.59245											30
				272.938												43.18					30
				273.335										1.56483							30
				274.845			11.8561			1.50642											30
				275.309													-17.536				30
				289.975										1.43389							30
				290.373			11.7803	5.7197		1.53358											30
				298.447			11.3258			1.52906						44.4747					30
				300				2.91667									-30.4467				30
				315.397				8.25758													100
				317.702			10.6439			1.53811											100
				321.226										1.50031							100
				337.347												47.5459					100
				339.559													-30.8388				100
				340.062			9.81061	4.92424		1.52453											100
				358.025													-29.8703				100
				359.938			9.88636			1.42038											100
				360.187				5.68182						1.50127							100
				377.778				4.73485									-27.853				100
				378.246												48.4378					100
				379.814			8.52273			1.18038											100
				380.239													-12.3677				100
				399.378				5.37879													100
				400.311			8.37121			1.19849											100
				416.64												51.3454					100
				420.186			7.61364	4.54545		0.904151											100
				437.578			6.62879			0.972075						50.784					100
				440.435				6.28788													100
				440.435				1.17424													100
				442.999										0.977888							100
				443.168			6.40151			0.908679											100
				445.679													-27.5648				100
				448.137			6.7803			0.98566											100
				449.767				4.2803													100
				453.086													-26.2392				100
				467.452												52.5322					100
				468.773										0.966572							100
				469.362			6.32576	2.5													100
				489.13			5.87121	4.16667		1.15321											100
				507.1												54.2878	-28.5127				100
				509.627			5.34091			1.21208											100
				510.372													-9.6869				100
				511.353				4.50758						1.14075							100
				528.882			4.58333			1.20302											100
				531.202										1.2248							100
				533.333													-27.7378				100
				545.652			4.96212			1.92755											100
				547.498													-4.47471				100
				549.216												56.9097					100
				550.544				2.34848													100
				569.207				2.15909													100
				571.118			4.05303			1.66943											100
				580.247													-26.7003				100
				588.802				0.227273								57.5127					100
				591.615			3.44697														100
