# Supplementary material for: Quantifying key drivers of marine pyrite burial flux and isotopic composition
Source: Research Square preprint supplement (doi:10.21203/rs.3.rs-4788953/v1), 2024-11-01
Supplement: Supplementary file 4 [file 13824-1.xlsx]

## Sheet: Sheet1
reference	latitude_dd	longitude_dd	water_depth_m	depth_cm	age_yr	porosity_vol_	SO4_mM	H2S_mM	CH4_mM	S_py_wt_	S_AVS_wt_	S0_wt_	TOC_wt_	Fe_HR_wt_	Fe_tot_wt_	d34S_SO4	d34S_H2S	d34S_py	lnSRR_molL_1d_1	lnMOR_molL_1d_1	sed_rate_cmky
Riedinger2017	-38.219	-53.3548	3821	6.80871			26.4671	0.0228531
				9.26641								0.115942	1.23672		3.247
				9.82711												20.6639
				20.8494								0.222222	1.42995		3.0168
				36.9231						0.0797411	0.00120192							-49.6154
				38.2044			25.183	0.0224016
				39.3822								0.183575	1.23672		3.10544	22.5539
				64.6154						0.16177	0.00104167							-49.6154
				65.3006												23.6821
				66.3502			22.6254	0.0220146
				67.1815								0.270531	1.40097		3.19379
				77.9528															4.78e-13
				85.7143								0.26087	1.09179		2.90562
				88.3202			21.6383	0.0283138
				90.6854												23.6619
				92.3077						0.176286	0.000561							-49.6154
				115.385						0.320837	0.00264423							-49.6154
				118.11			19.9625	0.0180696				0.193237	0.937198		3.31337
				123.038												25.1673
				149.514			18.7765	0.0241968
				150						0.090512	0.000881	0.135266	0.869565		3.51823			-47.3077
				153.082												26.6746
				169.648					0.200669
				182.308						0.143626	0.00328526							-47.8846
				182.368			16.0213	0.0171452
				185.423												27.7973
				187.645								0.193237	0.830918		3.78077
				198.425															4.78e-13
				210.638			15.0323	0.0168227
				212.308						0.297793	0.0042468							-47.3077
				213.127								0.318841	1.14976		3.98576
				215.49												30.0701
				240						0.307755	0.000881							-46.1538
				240.875								0.376812	1.32367		3.55309	30.0499
				243.554
				280.309								0.318841	0.94686		3.58432
				281.538						0.236057	0.00520833							-44.4231
				282.491												32.6963
				282.77			11.0887	0.0157478
				297.638															7.66e-13
				310.425								0.444444	0.917874		3.58628
				311.538						0.481544	0.00168269							-44.4231
				312.622			10.1973	0.0121038
				319.502												35.7291
				341.538						0.284687	0.00120192							-39.8077
				342.412			8.52152	0.0183169				0.531401	0.966184		3.76187
				347.25												37.621
				375.412					0.219358
				380.053			6.54925	0.0405787				0.386473	0.879227		3.99585
				383.077						0.611996	0.00120192							-35.1923
				391.229												42.1794
				392.126															4.78e-13
				409.897			5.55975	0.092713
				413.077						0.496937	0.00713141							-28.8462
				414.395												45.2232	42.9229
				414.672								0.714976	0.869565		3.85288
				442.471			3.78499	0.184039				0.743961	0.879227		3.65251
				443.077						0.30015	0.00600962							-25.3846
				444.55												50.5581
				474.364					0.21263
				480.477			1.91076	0.452472
				481.853								0.657005	0.743961		3.62534
				482.308						0.281313	0.00264423							-10.9615
				483.935												55.8857
				503.15															5.74e-13
				510.321			0.921258	0.612712
				511.969								0.502416	0.84058		3.27921
				512.308						0.24306	0.00552885							-9.23077
				518.772												63.5136
				541.779			0.421462	0.681067
				542.085								0.386473	0.985507		3.91925
				544.615						0.397296	0.00793269							13.5136
				573.358					0.467337
				579.231			0.0177812	0.598566		0.267884	0.00616987							18.4615
				583.784								0.879227	0.927536		3.97876
				586.634													15.9956
				609.449															6.7e-13
				611.538						0.422004	0.0364583	0.483092	0.956522		4.15463			24.8077
				612.622			0.105726	0.322717
				621.592													27.8339
				642.543			0.0965951	0.178138
				643.846						0.350144	0.0145032							29.4231
				644.015								0.637681	0.966184		4.67888
				654.033													32.4014
				677.171					1.40799
				678.764								0.763285	0.763285		4.36173
				680.769						0.086236	0.0420673							12.1154
				681.897			0.111493	0.0464371
				694.488															5.74e-13
				713.394			0.121104	0.0132002
				713.514								0.463768	0.850242		3.98702
				715.385						0.0287299	0.0295673							-17.3077
				738.996								0.26087	1.0628		4.30824
				744.89			0.130716	0.0128132
				774.727					2.51247
				780.695								0.347826	0.94686		3.64341
				781.11			0.141769	0.00899719
				784.615						0.0823992	0.0300481							-9.80769
				796.063															4.78e-13
				812.308						0.0826765	0.00921474							-17.8846
				812.614			0.0533436	0.00854572
				815.444								0.202899	0.821256		4.22436
				836.293								0.454106	0.908213		4.25629
				837.811			0.0610327	0.00818024
				871.78					0.414366
				880.309								0.289855	0.821256		3.96812
				880.33			0.0740082	0.00757828
				883.846						0.0497169	0.0170673							-18.4615
				912.741								0.173913	0.956522		4.26007
				913.846						0.146261	0.00825321							-22.5
				914.173															4.78e-13
				916.559			0.0129755	0.0104914
				941.538						0.266705	0.00216346							-27.1154
				941.74			0.190787	0.00997538
				942.857								0.231884	0.898551		4.26231
				971.128					2.92395
				979.923								0.289855	0.927536		3.74254
				981.11			0.202802	0.0160165
				983.077						0.0844563	0.00440705							-29.4231
				1011.05			0.0158589	0.00915843
				1013.08						0.094395	0.00825321							-40.3846
				1014.67								0.144928	0.753623		3.4835
				1044.79								0.811594	0.811594
				1045.38						0.190801	0.00216346							-27.6923
				1045.68			0.124468	0.0124468
				1065.82					5.76065
