# Supplementary material for: Quantifying key drivers of marine pyrite burial flux and isotopic composition
Source: Research Square preprint supplement (doi:10.21203/rs.3.rs-4788953/v1), 2024-11-01
Supplement: Supplementary file 7 [file 13863-1.xlsx]

## Sheet: Sheet1
reference	latitude_dd	longitude_dd	water_depth_m	depth_cm	age_yr	porosity_vol_	SO4_mM	H2S_mM	CH4_mM	S_py_wt_	S_AVS_wt_	S0_wt_	TOC_wt_	Fe_HR_wt_	Fe_tot_wt_	d34S_SO4	d34S_H2S	d34S_py	lnSRR_molL_1d_1	lnMOR_molL_1d_1	sed_rate_cmky
Riedinger2017	-39.3117	-53.9527	3687	4.04663								0.0836013	0.90404
				4.49583												20.4147
				5.70218			27.0711	0.00162602
				5.79151											2.78261
				6.43897						0.0238849	-56.5605
				7.40644								0.131833	1.16382
				21.0313								0.0836013	1.10678
				23.7636												20.6699
				25.0965											2.6087
				25.2525			25.6006	0.00487805
				25.7648								0.0546624	0.65508
				26.9739						0.0205267	-57.707
				41.7469												21.1802
				42.471											3.21739
				42.7495								0.122186	0.857816
				46.2621						0.0459324	-53.5032							-43.1716
				48.7417			24.275	0.00487805
				58.6019								0.131833	0.647037
				59.1031						0.0490252	-56.9427							-41.2755
				64.3915			23.2449	0.00813008
				64.8683												21.9458
				65.6371											3.5942
				78.048			21.7765	0.00487805
				81.4895								0.11254	0.792364
				83.0116											3.44928
				84.1362												22.9665
				84.7934						0.0616005	-55.7962							-41.6736
				89.3414								0.131833	0.725432
				92.8312								0.122186	0.917907
				100.962								0.131833	0.706758
				102.119												22.7113
				103.502			20.4502	0.00813008
				104.247											3.56522
				105.312						0.0454629	-53.8854							-38.6261
				122.123								0.189711	0.746233
				123.552											3.68116
				123.956												23.7321
				124.649						0.109207	-56.9427							-44.4013
				125.017			18.979	0.00487805
				137.527						0.141053	-56.5605							-43.6517
				140.927											3.7971
				143.321								0.141479	0.766479
				144.509												24.4976
				144.586			17.8011	0.0113821
				160.617						0.12809	-54.2675							-42.9046
				162.492												25.008
				162.589								0.170418	0.786632
				164.093											3.62319
				168.162			17.7926	0.00813008
				179.648								0.228296	0.950911
				181.467											3.62319
				181.69								0.180064	0.893316
				183.044												26.2839
				183.764			16.0308	0.00813008
				186.279						0.118302	-48.535							-44.8411
				187.37								0.151125	0.95128
				202.312												26.0287
				203.333			14.8529	0.0113821
				204.819								0.286174	0.913654
				206.564											3.88406
				222.008											3.91304
				222.912			13.8214	0.00813008
				223.588						0.181903	-41.2739							-41.8083
				224.149												27.3046
				224.254								0.237942	0.847277
				243.243											3.65217
				243.417												28.8357
				244.184						0.226467	-50.4459							-42.2113
				246.392			12.3495	0.00813008
				247.401								0.180064	0.858001
				260.077			11.3201	0.00487805
				263.969												29.0909
				264.479											3.91304
				264.572								0.353698	0.964593
				264.777						0.267837	-42.0382							-42.2284
				274.354								0.189711	0.897754
				281.602			9.99524	0.00813008
				282.317								0.189711	0.773135
				283.784											3.76812
				284.522												32.1531
				286.337						0.0631928	-40.5096							-36.12
				287.923								0.257235	0.869557
				301.604								0.160772	0.783674
				303.089											4.02899
				304.284						0.0438808	-51.9745							-35.368
				305.074												33.1738
				305.11			8.96231	0.00813008
				320.76								0.141479	0.861514
				320.976						0.0469429	-34.3949							-30.4024
				324.324											3.71014
				324.342												34.7049
				324.67			7.63813	0.00487805
				340.272			5.87636	0.00813008
				344.23						0.161774	-41.2739							-38.0921
				346.179												37.2568
				347.49											3.62319
				348.196								0.237942	0.65129
				362.12						0.097734	-43.5669							-31.9775
				362.877												38.7879
				363.473								0.421222	0.73856
				364.865											3.94203
				365.793			5.57441	0.00487805
				374.814								0.209003	0.864103
				383.43												41.8501
				383.436			4.98263	0.0211382
				384.17											3.7971
				386.49								0.286174	0.816585
				387.987						0.247688	-34.7771							-32.3817
				390.166								0.488746	0.912915
				403.902								0.29582	0.798188
				403.982												45.6778
				404.97			3.80407	0.0796748
				406.336						0.541472	-56.9427							-12.8501
				409.266											3.71014
				422.575			2.62695	0.21626
				423.151								0.382637	0.827956
				424.534												49.5056
				425.698						0.624385	-51.9745							-4.05185
				428.571											3.94203
				440.218			2.03517	0.356098
				442.252								0.459807	0.93464
				447.656												54.0989
				447.876											4.72464
				448.681						0.528356	-53.8854							-7.13484
				461.817								1.22186	0.800961
				463.07													25.7735
				463.726			1.00224	0.456911
				465.197						0.394039	-52.3567							33.1032
				469.112											3.71014
				477.422								0.430868	0.718375
				477.46			0.704564	0.518699
				485.008								0.92283	0.789251
				488.722						0.719731	-50.828							46.502
				490.348											4.23188
				494.041								0.681672	0.776864
				501.931											3.62319
				502.766								1	0.924717
				502.952			0.036406	0.596748
				505.028						0.422476	-52.7389							1.24079
				520.873													17.3525
				523.166											3.56522
				524.562			0.0442583	0.421138
				525.152								0.459807	0.662969
				531.805						0.281688	-49.6815							50.2917
				536.36			0.0977966	0.23252
				540.541											3.94203
				545.596								0.488746	0.740871
				547.848													30.8772
				548.551						0.326284	-44.7134							43.7595
				561.776											3.91304
				563.845			0.204873	0.0113821
				567.326								0.614148	0.818835
				570.819					0.11221
				572.682						0.124814	-30.5732							3.86812
				582.684								0.508039	0.864442
				588.107						0.140666	-30.5732							-11.488
				588.803											3.5942
				589.404			0.0785228	0.0113821
				593.079								0.527331	0.813658
				603.313								0.604502	0.846199
				604.247											3.85507
				605.121			0.0728121
				607.391						0.162876	-50.828							-19.1691
				623.552											3.82609
				626.573						0.105216	-49.2994							-14.5943
				626.726								0.189711	0.719115
				626.732			0.0649598
				639.819								0.21865	0.604357
				640.927											3.88406
				644.59						0.140216	-51.5924							-36.8464
				646.369			0.0885166
				653.576						0.140145	-55.7962							-29.5707
				662.086			0.0942274
				662.162											3.3913
				662.985								0.266881	0.605467
				663.804						0.108115	-55.7962							-33.7989
				671.797					0.258445
				681.968								0.170418	0.773042
				687.645			0.189169
				688.552								0.141479	0.696435
				689.507						0.130275	-50.4459							-38.4216
				693.05											3.94203
				697.511								0.170418	0.722505
				703.333			0.255556
				704.633											3.65217
				707.634								0.189711	0.812733
				712.654						0.162039	-53.5032							-31.5341
				724.963			0.0292676
				725.869											3.5942
				726.824						0.200265	-53.8854							-41.9014
				727.224								0.209003	0.666235
				741.313											3.68116
				742.507								0.237942	0.7503
				742.635			0.123495
				747.326						0.171348	-56.1783							-35.7918
				755.352								0.21865	0.763736
				764.435								0.170418	0.72571
				766.211			0.132061
				768.34											3.65217
				769.1						0.132837	-56.9427							-33.1289
				772.872					0.479842
				782.33								0.21865	0.790669
				785.857			0.1392
				786.537								0.199357	0.611383
				787.079						0.139083	-45.8599							-39.6734
				791.506											3.56522
				797.644			0.143483
				801.028								0.430868	0.439
				806.95											3.71014
				808.095								0.353698	0.779082
				808.869						0.113351	-53.8854							-26.6494
				819.95								0.29582	0.638624
				823.194			0.00642459
				830.06									0.735262
				830.116											3.65217
				832.074						0.189844	-56.9427							-33.1853
				841.767									0.67172
				843.629											3.5942
				846.187						0.183342	0.183342							-23.6117
				848.715			0.308381
				856					0.988968
