# Supplementary material for: Quantifying key drivers of marine pyrite burial flux and isotopic composition
Source: Research Square preprint supplement (doi:10.21203/rs.3.rs-4788953/v1), 2024-11-01
Supplement: Supplementary file 13 [file 18MC.xlsx]

## Sheet: Sheet1
reference	latitude_dd	longitude_dd	water_depth_m	depth_cm	age_yr	porosity_vol_	SO4_mM	H2S_mM	CH4_mM	S_py_wt_	S_AVS_wt_	S0_wt_	TOC_wt_	Fe_HR_wt_	Fe_tot_wt_	d34S_SO4	d34S_H2S	d34S_py	lnSRR_molL_1d_1	sed_rate_cmky
Boening2004	-11.0303	-78.0805	255	3.5									19.8					-29.1
				17.5									16.5					-29.5
				29.5									11.5					-32.5
