# Supplementary material for: Quantifying key drivers of marine pyrite burial flux and isotopic composition
Source: Research Square preprint supplement (doi:10.21203/rs.3.rs-4788953/v1), 2024-11-01
Supplement: Supplementary file 16 [file 22680.xlsx]

## Sheet: Sheet1
reference	latitude_dd	longitude_dd	water_depth_m	depth_cm	age_yr	porosity_vol_	SO4_mM	H2S_mM	CH4_mM	S_py_wt_	S_AVS_wt_	S0_wt_	TOC_wt_	Fe_HR_wt_	Fe_tot_wt_	d34S_SO4	d34S_H2S	d34S_py	lnSRR_molL_1d_1	sed_rate_cmky
Dale2009	-23.7753	14.2993		0			28.8
				0.5		0.94	28.3									19.5	17
				1.5		0.93	28.4									19.5		-19.4
				2.5		0.93	28									19.8	14.5	-18.1
				3.5		0.92	28.3									20.7	18.6	-18.1
				4.5		0.92	27.9									21.1		-18.6
				6		0.9	26.8									23.3	-0.1	-19
				8		0.89	25.8									25.3		-22.1
				10		0.89	24.4									27.1	-20.8	-20.8
				12		0.87	23.8									28.5	-19.7	-22.2
				14		0.87	23.7									30		-21.3
				16		0.83	22									32	-23.3	-23.3
				18		0.83	22.4									32.9	-23.9	-23.2
				20		0.84	22									35.1	-22.6	-25.6
				22		0.85	21.8									35.7	-21.9	-25.8
				24		0.84	20.8									36.6	-20.3	-26.9
				29		0.84	21.2									37.5	-16.5	-27
				34		0.84	20									38.2		-23
				39		0.84	20.2									39	-20.4	-20.2
				44		0.84	19.4									39.4	-17.1	-22.4
				49		0.84	18.7									40.8	-15.6	-24.2
				60		0.83	18.7		0.015							41.7	-11.7	-12.7
				70		0.85	15.2		0.017							46	-7.6	-12.7
				80		0.86	12		0.024							47.8	-1.5	-9.2
				90		0.86	7.5		0.034							52.2	5	-5.3
				114		0.84	4.3		0.056							52.6	10.9	5.3
				119		0.88	2.3		0.057							60.4	12.6	4.6
				124		0.82	1.5		0.075							58.6	14.2	0.6
				129		0.84	0.7		0.124								15.9	3.5
				134		0.85	0.3		0.239								17.2	-0.4
				139		0.84	0.5		0.442								17.1	3.8
				144		0.86	0		0.743								17.3	-0.9
				149		0.83	0.1		0.949								17.2	2.6
				154		0.84	0		1.036								17.3	-2.7
				159		0.79	0.5		1.384									-5.3
				164		0.83	0.3		1.422								17.3	-1.8
				169		0.85	0.1		1.525								17.4	-0.8
				174		0.85	0		1.463								16.8	4.7
				179		0.82	0.4		1.645								17.3	-1.3
				184		0.81	1.2		1.467								17.3	-5
				189		0.81	0.5		1.536								17.2	-9.5
				194		0.79	0.1		1.333									0.8
				211		0.78	0.3		0.683									8.2
				226		0.79	0.1		1.202								16	9.1
				241		0.8	0.2		0.924									10
				256		0.69	0.3		1.413								17	8.8
				271		0.86	0		1.225									13
				286		0.83	0		1.238								16.3	9.4
				307		0.8	0.1		1.054									7.6
				322		0.78	0.1		0.802								16.6	8.5
				337		0.82	0		0.95								16.5	9
				352		0.81	0		1.423								16.1	11.6
				367		0.81	0		1.235								16.1	10.3
				382		0.81			1.302								16	6.2
				406		0.79			1.142								15.6	6
				421		0.8			1.075									6
				436		0.8			1.048								15.4	7.3
				451		0.82			1.246								14.7	7.9
				466		0.8			1.241								14.8	7.2
				481		0.79			0.817								14.4	3.3
