# Supplementary material for: Quantifying key drivers of marine pyrite burial flux and isotopic composition
Source: Research Square preprint supplement (doi:10.21203/rs.3.rs-4788953/v1), 2024-11-01
Supplement: Supplementary file 28 [file 2A.xlsx]

## Sheet: Sheet1
reference	latitude_dd	longitude_dd	water_depth_m	depth_cm	age_yr	porosity_vol_	SO4_mM	H2S_mM	CH4_mM	S_py_wt_	S_AVS_wt_	S0_wt_	TOC_wt_	Fe_HR_wt_	Fe_tot_wt_	d34S_SO4	d34S_H2S	d34S_py	lnSRR_molL_1d_1	lnMOR_molL_1d_1	sed_rate_cmky
Lin 2016c	20.05	117.417	1980	692.5						1.011								-43.7
				702.5						2.5958								-44.9
				712.5						1.7847								-42.8
				732.5						1.4969								-41.6
				742.5						1.4436								-39.8
				762.5						1.7853								-38.8
				772.5						1.889								-39.4
				787.5						1.4653								-37.7
				802.5						2.3247								-38
				817.5						1.544								-34.3
				827.5						1.2609								-34
