# Supplementary material for: Quantifying key drivers of marine pyrite burial flux and isotopic composition
Source: Research Square preprint supplement (doi:10.21203/rs.3.rs-4788953/v1), 2024-11-01
Supplement: Supplementary file 40 [file 50G.xlsx]

## Sheet: Sheet1
reference	latitude_dd	longitude_dd	water_depth_m	depth_cm	age_yr	porosity_vol_	SO4_mM	H2S_mM	CH4_mM	S_py_wt_	S_AVS_wt_	S0_wt_	TOC_wt_	Fe_HR_wt_	Fe_tot_wt_	d34S_SO4	d34S_H2S	d34S_py	lnSRR_molL_1d_1	lnMOR_molL_1d_1	sed_rate_cmky
Sweeney1980	24.6967	-109.165		7.73511						0.0385791
				8.82353									4.68778
				17.3046						0.138175
				18								0.3						-24
				22.4748						0.215734
				22.7941									4.36199
				25								0.22						-24.3
				34.5588									4.1086
				35								0.31						-24.3
				37.7584						0.137311
				51.7149						0.242276
				52.2059									4.79638
				55								0.39						-24.2
				67.0552						0.241628
				68.3824									4.0181
				75								0.54						-25.9
				80.265						0.324404
				95								0.48						-24.2
				105								0.71						-19
				108.884						0.500972
				111.765									4.1267
				125								0.64						-18.5
				127.053						0.372427
				128.676									2.76923
				135								0.73						-17.6
				144.118									2.49774
				145								0.66						-16.7
				156.5						0.682294
				157.353									2.22624
				171.15						0.73723
				174.265									2.26244
				175								0.67						-17.7
				186.418						0.636585
				188.235									2.49774
				195								0.7						-17.2
				203.276						0.713651
				204.412									2.44344
				217.111						0.651955
				235.294									2.00905
				244.853									2.24434
				262.5									2.06335
