# Supplementary material for: Quantifying key drivers of marine pyrite burial flux and isotopic composition
Source: Research Square preprint supplement (doi:10.21203/rs.3.rs-4788953/v1), 2024-11-01
Supplement: Supplementary file 43 [file 680.xlsx]

## Sheet: Sheet1
reference	latitude_dd	longitude_dd	water_depth_m	depth_cm	age_yr	porosity_vol_	SO4_mM	H2S_mM	CH4_mM	S_py_wt_	S_AVS_wt_	S0_wt_	TOC_wt_	Fe_HR_wt_	Fe_tot_wt_	d34S_SO4	d34S_H2S	d34S_py	lnSRR_molL_1d_1	lnMOR_molL_1d_1	sed_rate_cmky
Mossmann1991	-11.065	-78.0778	252	30						0.85	0	0.075	9		1.84			-29
				80						0.71	0.03	0.088	7.3		1.75			-27.9
				130			25.3	2									-24.3
				290			19.4	3.6									-24.4
				450			20.6	1.2									-24.7
				480						0.99	0.04	0.042	5.4		1.89			-26.8
				630			18.1	2.6									-18
				880						0.98	0.07	0.039	5.2		2.23			-22.1
				1830			12.6	4.3									-3.3
				1950			11	5.6									-3.9
				2230						1.12	0.07	0.041	7		1.75			-13.6
				4300						0.58	0.35	0.03	1.1		1.45			-26.4
				4800			6	4.5									12.2
				2.38		0.7956
				5.27		0.8012
				7.71		0.8428
				10.57		0.7963
				13.54		0.8079
				16.57		0.7097
				20.7		0.7143
				23.01		0.7967
				26.36		0.4995
				28.5		0.7436
				29.59		0.8106
				35.86		0.677
				39.08		0.8061
				40.85		0.8911
				58.01		0.577
				60.87		0.548
				63.63		0.618
				67.71		0.7686
				70.61		0.7684
				73.85		0.6729
				77		0.6736
				80.11		0.7065
				82.79		0.7419
				86.4		0.6834
				89.37		0.7244
				91		0.718
