# Supplementary material for: Quantifying key drivers of marine pyrite burial flux and isotopic composition
Source: Research Square preprint supplement (doi:10.21203/rs.3.rs-4788953/v1), 2024-11-01
Supplement: Supplementary file 46 [file 686.xlsx]

## Sheet: Sheet1
reference	latitude_dd	longitude_dd	water_depth_m	depth_cm	age_yr	porosity_vol_	SO4_mM	H2S_mM	CH4_mM	S_py_wt_	S_AVS_wt_	S0_wt_	TOC_wt_	Fe_HR_wt_	Fe_tot_wt_	d34S_SO4	d34S_H2S	d34S_py	lnSRR_molL_1d_1	lnMOR_molL_1d_1	sed_rate_cmky
Mossmann1991	-13.4802	-76.8915	457	30						1.1	0.01	0.014	2.1		2.51			-35.1			5.75
				90						1.18	0.01	0.012	1.5		2.66			-33.3			5.75
				380						1.16	0.01	0.011	2.8		2.17			-28.9			5.75
				450			19.1	3									-13.1				5.75
				680						0.91	0.03	0.007	1.2		2.51			-31.1			22.5
				1290			1.8	11.8									-14.7				22.5
				1980						1.06	0.06	0.001	1.4		2.66			-5.7			22.5
				2250			0														22.5
				4150			0	1.1									17.3				22.5
				4950			0	0													22.5
				5000						0.72	1.01	0.017	2.4		2.03			-23.8			22.5
				8010						0.92	0.03	0.011	2.5		2.17			-13.4			22.5
				8400			0														22.5
				10650			0														22.5
				11070			0														22.5
				13830						0.95	0.01		3.9		2.09			-10.4			22.5
				13950			0														22.5
				16640			0														22.5
				18670			0														22.5
				2.27		0.7339
				4.66		0.7679
				7.44		0.7419
				10.28		0.7412
				13.44		0.7115
				17.18		0.5681
				19.87		0.7636
				23.89		0.7547
				24.75		0.6661
				27.33		0.6339
				27.88		0.5291
				34.84		0.7286
				40.12		0.4836
				45.88		0.841
				49.09		0.7955
				62.8		0.612
				63.3		0.6908
				63.9		0.7331
				64.43		0.6935
				65.34		0.6704
				65.84		0.6218
				67.45		0.7525
				69.47		0.8353
				73.14		0.7483
				75.01		0.7561
				76.3		0.6955
				84.35		0.7126
				85.53		0.7174
				89.9		0.6655
				94.37		0.6785
				97.28		0.7113
				104.76		0.817
				110.55		0.469
				112.45		0.5388
				120.63		0.621
				125.45		0.7726
				131.08		0.891
				131.13		0.8287
				135.55		0.8746
				139.15		0.6798
				140.04		0.696
				143.48		0.6201
				147.77		0.836
				148.9		0.7864
				154.48		0.6281
				158.56		0.5792
				161.89		0.8173
				165.04		0.7497
				166.55		0.7561
				170.5		0.8201
				174.08		0.8135
				175.57		0.7382
				180.91		0.8414
				184.32		0.7536
				185.3		0.773
				200.03		0.7231
				201.89		0.7369
				204.18		0.7796
