# Supplementary material for: Quantifying key drivers of marine pyrite burial flux and isotopic composition
Source: Research Square preprint supplement (doi:10.21203/rs.3.rs-4788953/v1), 2024-11-01
Supplement: Supplementary file 49 [file 7G.xlsx]

## Sheet: Sheet1
reference	latitude_dd	longitude_dd	water_depth_m	depth_cm	age_yr	porosity_vol_	SO4_mM	H2S_mM	CH4_mM	S_py_wt_	S_AVS_wt_	S0_wt_	TOC_wt_	Fe_HR_wt_	Fe_tot_wt_	d34S_SO4	d34S_H2S	d34S_py	lnSRR_molL_1d_1	lnMOR_molL_1d_1	sed_rate_cmky
Sweeney1980	21.771	-107.65		4.11119						0.181863
				6.46214									2.48727
				12.8203						0.250894
				15.8616									2.60364
				24.8325						0.501561
				28.1984									3.06909
				35.5074						0.393282
				37.0104									2.44364
				71.0101						0.600897
				73.4334									2.93818
				79.8956									1.83273
				79.9035						0.512681
				85.6072						0.646062
				89.295									2.22545
				92.0717						0.630292
				98.1071									2.06545
				101.457						0.622748
				102.219									2.72
				106.332									3.31636
				108.488						0.623138
				113.381									2.95273
				121.606									3.11273
				124.333						0.603856
				133.355									2.92364
				133.689						0.620505
				136.88									3.38909
				142.755									2.50182
				144.704						0.721922
				150.979									2.83636
				150.989						0.859368
				154.504									2.00727
				156.31						0.819341
				156.854									1.64364
				163.316									1.44
				168.01						0.836119
				169.191									1.57091
				178.59									1.92
				179.668						0.889185
				184.465									1.86182
				188.888						1.02276
				193.277									1.00364
				193.401						1.17221
				195.039									0.552727
				201.155						1.0557
				202.089									1.03273
				205.614									1.12
				210.313									1.22182
