# Supplementary material for: Quantifying key drivers of marine pyrite burial flux and isotopic composition
Source: Research Square preprint supplement (doi:10.21203/rs.3.rs-4788953/v1), 2024-11-01
Supplement: Supplementary file 52 [file 8-19.xlsx]

## Sheet: Sheet1
reference	latitude_dd	longitude_dd	water_depth_m	depth_cm	age_yr	porosity_vol_	SO4_mM	H2S_mM	CH4_mM	S_py_wt_	S_AVS_wt_	S0_wt_	TOC_wt_	Fe_HR_wt_	Fe_tot_wt_	d34S_SO4	d34S_H2S	d34S_py	lnSRR_molL_1d_1	lnMOR_molL_1d_1	sed_rate_cmky
Yucel2012	41.4997	40.7522	1741	0.365764									4.71782
				1.36793									1.14286					-22.4775
				2.47324									0.948089
				3.33499									0.964826
				4.38158									0.998983
				5.3662									0.997992					-22.895
				6.41517									1.22581
				7.53326									2.06975
				8.3506									3.47738
				9.49166									1.1875					-28.3769
				10.2884									0.922611
				11.4563									0.8158
				12.6262									0.867439
				13.2423									0.919635
				14.4737									0.971211
				15.335									0.952738
				16.4433									1.00444
				17.4273									0.95063
