# Supplementary material for: Quantifying key drivers of marine pyrite burial flux and isotopic composition
Source: Research Square preprint supplement (doi:10.21203/rs.3.rs-4788953/v1), 2024-11-01
Supplement: Supplementary file 55 [file 8-23.xlsx]

## Sheet: Sheet1
reference	latitude_dd	longitude_dd	water_depth_m	depth_cm	age_yr	porosity_vol_	SO4_mM	H2S_mM	CH4_mM	S_py_wt_	S_AVS_wt_	S0_wt_	TOC_wt_	Fe_HR_wt_	Fe_tot_wt_	d34S_SO4	d34S_H2S	d34S_py	lnSRR_molL_1d_1	lnMOR_molL_1d_1	sed_rate_cmky
Yucel2012	42.034	39.5337	2002	0.499396									8.40339
				1.63303									6.37988
				2.5941									7.26451					-37.8478
				3.6008									5.31217
				4.61156									3.99811
				5.62391									2.93229					-35.0196
				6.45555									3.49802
				7.41324									3.85074
				8.4956									3.77768
				9.51178									3.31468
				10.5268									2.67438
				11.5362									1.14756
				12.491									1.0393
				13.5749									1.21446
				14.5304									1.21257					-28.3769
				15.5495									1.21056
				16.5054									1.2796
