# Supplementary material for: Quantifying key drivers of marine pyrite burial flux and isotopic composition
Source: Research Square preprint supplement (doi:10.21203/rs.3.rs-4788953/v1), 2024-11-01
Supplement: Supplementary file 58 [file 8-30.xlsx]

## Sheet: Sheet1
reference	latitude_dd	longitude_dd	water_depth_m	depth_cm	age_yr	porosity_vol_	SO4_mM	H2S_mM	CH4_mM	S_py_wt_	S_AVS_wt_	S0_wt_	TOC_wt_	Fe_HR_wt_	Fe_tot_wt_	d34S_SO4	d34S_H2S	d34S_py	lnSRR_molL_1d_1	lnMOR_molL_1d_1	sed_rate_cmky
Yucel2012	42.5147	30.9967	2159	0.75774									7.73792
				1.45266									1.51829
				2.55927									1.23474
				2.67717														-26.2058
				3.8274									1.12773
				5.03937														-23.3762
				5.09778									1.16207
				5.41748									1.30316
				6.68842									1.37283
				7.08661														-26.9775
				7.64414									1.58409
				8.50394														-20.0322
				9.92126														-18.8746
				10.0251									1.58222
				10.9774									1.58147
				11.0236														-25.5627
				12.5647									1.58022
				13.5131									1.33213
				15.4167									1.25996
				16.2115									1.33
				16.2205														-21.1897
				17.1654														-26.9775
				17.3231									1.36447
				18.5827														-25.4341
				18.8975									0.550506
				19.5992									4.7549
				19.8425														-33.2797
				20.7874														-40.2251
				21.0227									4.43576
				21.602									0.937071
				21.7323														-33.9228
				22.7165									1.14821
				22.9921														-31.9936
				23.8276									1.14733
				25.5736									1.14596
				26.6847									1.14509
				27.2441														-29.2926
				28.4307									1.14371
				31.1811														-28.6495
				33.8246									0.962792
				35.8836									0.678487
				36.2205														-27.8778
				37.8556									4.91722
				39.8596									1.17006
				40.1575														-29.2926
				43.0347									1.2029
				44.6208									1.13098
				46.6843									1.12935
				48.4297									1.09265
				51.3386														-24.4051
				51.445									1.05494
				54.9387									1.1582
				57.0021									1.15657
				58.7481									1.1552
