# Supplementary material for: Quantifying key drivers of marine pyrite burial flux and isotopic composition
Source: Research Square preprint supplement (doi:10.21203/rs.3.rs-4788953/v1), 2024-11-01
Supplement: Supplementary file 61 [file 8-7.xlsx]

## Sheet: Sheet1
reference	latitude_dd	longitude_dd	water_depth_m	depth_cm	age_yr	porosity_vol_	SO4_mM	H2S_mM	CH4_mM	S_py_wt_	S_AVS_wt_	S0_wt_	TOC_wt_	Fe_HR_wt_	Fe_tot_wt_	d34S_SO4	d34S_H2S	d34S_py	lnSRR_molL_1d_1	lnMOR_molL_1d_1	sed_rate_cmky
Yucel2012	42.7837	37.493	2145	0.522648									9.08209
				1.42857									7.96269					-41.8182
				2.54355									8.36567					-38.0519
				3.44948									6.30597
				4.52962									4.76119					-32.4675
				5.47038									4.42537					-36.8831
				6.51568									5.45522					-25.3247
				7.59582									5.14179
				8.50174									6.55224
				9.65157									5.23134					-42.3377
