# Supplementary material for: Quantifying key drivers of marine pyrite burial flux and isotopic composition
Source: Research Square preprint supplement (doi:10.21203/rs.3.rs-4788953/v1), 2024-11-01
Supplement: Supplementary file 67 [file 964.xlsx]

## Sheet: Sheet1
reference	latitude_dd	longitude_dd	water_depth_m	depth_cm	age_yr	porosity_vol_	SO4_mM	H2S_mM	CH4_mM	S_py_wt_	S_AVS_wt_	S0_wt_	TOC_wt_	Fe_HR_wt_	Fe_tot_wt_	d34S_SO4	d34S_H2S	d34S_py	lnSRR_molL_1d_1	sed_rate_cmky
Boettcher1998	36.2604	17.7498	3657	14.25			29.1									23.6
				25.25			29									23.2
				52.25			28.9									24.4
				79.2			26.3									24.6
				98.2			28.9									25
				1.45			31.3									21.3
				2.95			30.6									21.2
				4.45			30.7									21.7
