# Supplementary material for: Quantifying key drivers of marine pyrite burial flux and isotopic composition
Source: Research Square preprint supplement (doi:10.21203/rs.3.rs-4788953/v1), 2024-11-01
Supplement: Supplementary file 115 [file 973-4_2020.xlsx]

## Sheet: Sheet1
reference	latitude_dd	longitude_dd	water_depth_m	depth_cm	age_yr	porosity_vol_	SO4_mM	H2S_mM	CH4_mM	S_py_wt_	S_AVS_wt_	S0_wt_	TOC_wt_	Fe_HR_wt_	Fe_tot_wt_	d34S_SO4	d34S_H2S	d34S_py	lnSRR_molL_1d_1	lnMOR_molL_1d_1	sed_rate_cmky
Liu2020	21.9054	118.818	1666	0			28
				17.5	505													-6
				17.6411									0.228916
				38.8105									0.319277
				57.8629									0.350904
				62.5														-12.3
				79.0323									0.337349
				88.4677			24.971
				98.0847									0.323795
				106.5														-16.4
				115.02									0.251506
				140.423									0.332831
				159.476									0.237952
				161.5														-33.2
				178.528									0.355422
				179	5593
				199.698									0.373494
				200.504			24.2841
				214.516									0.237952
				217.5														-32.2
				225	5843
				237.802									0.301205
				258.972									0.292169
				273.5														-41.5
				276.5	7064
				280.141									0.644578
				301.31									0.278614
				318.246									0.328313
				323.5														-42
				337.298									0.179217
				340	8788
				360.585									0.192771
				373.5														-46
				379.637									1.02861
				388.172			16.465
				398.69									0.40512
				419.859									0.373494
				420.5														-44.3
				438.911									0.463855
				442.5	12272
				454.5	14088
				459	13266
				460.081									0.206325
				460.5														-42.3
				479	18492
				481.25									0.454819
				499.5														-45.2
				500.302									0.409639
				505	30948
				523.589									0.323795
				537.5														-42.6
				540.524									0.432229
				552.5	30976
				559.577									0.346386
				561.5	34090
				579														-35.5
				580	35653
				580	40352
				580.746									1.06928
				596.5														-15.3
				599.355			12.2415
				599.798									0.346386
				605.5	35135
				611.5														-0.2
				620.5														-13.7
				623.085									0.364458
				626.5														-26.4
				630	21275
				637.5														12.1
				644.254									0.368976
				649.5														1.1
				658.5														-4.5
				659.073									0.323795
				670.5														9.7
				680.242									0.599398
				681.5														20.4
				692.5	21333
				693.5														22.3
				699.294									0.328313
				708.5														11.9
				720.464									0.319277
				720.5														11.5
				731.5														26
				739	19852
				739.516									1.30422
				755	22388
				755.5														19.4
				760.686									0.314759
				777.621									0.337349
				779														20.5
				797.5														23.8
				798.79									0.378012
				819.96									0.391566
				822.5														20.1
				834.5														14.9
				843.246									0.287651
				856.5														23.5
				859	24690
				864.415									0.346386
				865.5														17.7
				868.5	19333
				871.5														35.9
				881.351									0.396084
				881.5														48.6
				892	27855
				893.5														29.2
				899.5														26.7
				900.403									0.296687
				902.5	27754
				905.5														17.3
				908.5														3.7
				911.5														6.8
				921.573									0.314759
				925.5														-2.2
				938.508									0.328313
				958.5														1.6
				961.794									0.26506
				980.847									0.350904
				995.5														2.7
				1004.13									0.337349
				1016.83									0.658133
				1019.5														-3.7
				1056.5														-2.8
				1059.17									0.296687
				1084.58									0.260542
				1090	32060
				1096.5														2.2
				1099.4									0.332831
				1118.45									0.341867
				1131.5														-4.7
				1143.85									0.269578
				1168.5														-5.6
				1181.96									0.305723
				1203.12									0.319277
				1204.5														-7.9
				1220.06									0.495482
				1246.5														-3.3
				1262.4									0.328313
				1271.5														-9.6
				1279.33									0.283133
				1283.5														-6.5
				1285	40701
				1302.62									0.332831
				1323.5														-6.2
				1323.79									0.269578
				1372.5														-5.9
