# Supplementary material for: Quantifying key drivers of marine pyrite burial flux and isotopic composition
Source: Research Square preprint supplement (doi:10.21203/rs.3.rs-4788953/v1), 2024-11-01
Supplement: Supplementary file 127 [file 976.xlsx]

## Sheet: Sheet1
reference	latitude_dd	longitude_dd	water_depth_m	depth_cm	age_yr	porosity_vol_	SO4_mM	H2S_mM	CH4_mM	S_py_wt_	S_AVS_wt_	S0_wt_	TOC_wt_	Fe_HR_wt_	Fe_tot_wt_	d34S_SO4	d34S_H2S	d34S_py	lnSRR_molL_1d_1	sed_rate_cmky
Boettcher1999	36.2052	-4.31333	1107.5	1.28			29.3									23.6
				2.95			24.2
				4.45			21.2									31.3
				7.45			14.7
				10.45			7.9
				12.45			5.2									55
				13.95			3
				15.45			1.9
				16.95			0.9
				18.45			0.6
				19.95
				20.45
				21.95			0.5
				23.45			0.4
				24.95
				26.45			0
				27.95			0.1
				29.45			0.3
