# Supplementary material for: Quantifying key drivers of marine pyrite burial flux and isotopic composition
Source: Research Square preprint supplement (doi:10.21203/rs.3.rs-4788953/v1), 2024-11-01
Supplement: Supplementary file 130 [file 977.xlsx]

## Sheet: Sheet1
reference	latitude_dd	longitude_dd	water_depth_m	depth_cm	age_yr	porosity_vol_	SO4_mM	H2S_mM	CH4_mM	S_py_wt_	S_AVS_wt_	S0_wt_	TOC_wt_	Fe_HR_wt_	Fe_tot_wt_	d34S_SO4	d34S_H2S	d34S_py	lnSRR_molL_1d_1	sed_rate_cmky
Boettcher1999	36.0318	-1.95532	1984	1.45			28.9									26.9
				2.95			28.6									27.6
				6.88			20.1									34.5
				9.88			16.8									29.4
				17.95			10.7									49.7
				27.45			6.5									71
				36.95			2.7									78.1
				46.45			0.3
				74.95			0
				103.45			0
				131.45			0
				160.45			0.3
				189.35			0
				218			0
				247			0.2
				275.8			0
				304.5			0
				333.3			0
				362.6			0
				391.1			0
				420			0
				448.9			0
				476.2			0.4
				506.5			6.5
