# Supplementary material for: Quantifying key drivers of marine pyrite burial flux and isotopic composition
Source: Research Square preprint supplement (doi:10.21203/rs.3.rs-4788953/v1), 2024-11-01
Supplement: Supplementary file 142 [file ABC15.xlsx]

## Sheet: Sheet1
reference	latitude_dd	longitude_dd	water_depth_m	depth_cm	age_yr	porosity_vol_	SO4_mM	H2S_mM	CH4_mM	S_py_wt_	S_AVS_wt_	S0_wt_	TOC_wt_	Fe_HR_wt_	Fe_tot_wt_	d34S_SO4	d34S_H2S	d34S_py	lnSRR_molL_1d_1	sed_rate_cmky
Henneke1997	33.8783	26.04	3370	5.02426			30.5812
				17.1171			31.1295
				32.3285			33.395
				40.887			25.3303
				67.7755			21.2483
				82.8829			21.79
				100.589			15.4293
				109.771			17.7081
				121.76			16.5324
				151.802			14.7424
				166.736			12.4108
				193.59			7.75429
				202.772			10.033
				220.825			9.41876
				235.863			8.8111
				268.884			6.43989
				280.769			3.54029
				299.099			7.52312
				310.845			2.32497
				329.106			5.15852
				350.104			3.38838
				368.122			2.19947
				383.195			2.16645
				395.253			2.14003
				416.32			1.51915
				431.358			0.911493
				443.416			0.885073
				473.458			-0.904888
				485.551			-0.356671
				506.687			0.171731
				527.859			1.27477
				554.99			1.21532
				12.4031				0.0188088
				33.0749				0.00626959
				59.9483				0.0125392
				64.0827				0.0125392
				105.426				0.0250784
				163.308				0.495298
				167.442				0.601881
				212.92				2.12539
				248.062				1.03448
				266.667				1.64263
				295.607				1.86207
				324.548				1.61755
				370.026				2.37618
				398.966				1.59875
				429.974				1.49843
				469.251				1.97492
				485.788				1.3605
				502.326				1.91223
				10.6692														-26.8788
				54.4891														-27.5564
				105.306														-26.8353
				222.273														-21.0607
				268.779														-18.8067
				345.119														-20.167
				402.085														-30.0478
				440.446														-34.7744
