# Supplementary material for: Quantifying key drivers of marine pyrite burial flux and isotopic composition
Source: Research Square preprint supplement (doi:10.21203/rs.3.rs-4788953/v1), 2024-11-01
Supplement: Supplementary file 145 [file ABC45.xlsx]

## Sheet: Sheet1
reference	latitude_dd	longitude_dd	water_depth_m	depth_cm	age_yr	porosity_vol_	SO4_mM	H2S_mM	CH4_mM	S_py_wt_	S_AVS_wt_	S0_wt_	TOC_wt_	Fe_HR_wt_	Fe_tot_wt_	d34S_SO4	d34S_H2S	d34S_py	lnSRR_molL_1d_1	sed_rate_cmky
Henneke1997	34.3733	20.0517	3350	23.9283			85.4047
				37.7072			84.3588
				48.0919			84.3023
				61.6692			80.3449
				89.0926			76.3121
				123.574			74.1826
				147.603			71.1392
				168.708			75.8786
				192.603			70.8942
				210.045			72.741
				216.363			63.9687
				226.882			65.8532
				261.43			64.6942
				285.594			63.5918
				316.949			66.3337
				333.719			58.4755
				354.757			62.2444
				372.401			67.0027
				402.883			57.1281
				410.007			60.0019
				434.037			56.9584
				472.248			58.6922
				475.037			48.9682
				499.47			51.7479
				523.633			50.6454
				551.326			50.4947
				578.884			48.4029
				592.595			46.3865
				609.97			47.2628
				644.317			43.1923
				665.355			46.9613
				682.259			41.044
				699.432			39.0088
				720.471			42.7777
				744.298			36.8228
				761.538			35.758
				796.154			35.5696
				837.692			35.3434
				57.8811				0.00626959
				113.695				0.0188088
				196.382				0.62069
				287.339				0.144201
				396.899				0.00626959
				487.855				0.451411
				595.349				0.746082
				696.641				0.0188088
				787.597				0.827586
				7.10863														-34.8875
				17.2807														-35.859
				22.6377														-31.5753
				44.6783														-33.6573
				48.2994														-29.9259
				63.1765														-38.0881
				81.9024														-38.5099
				105.97														-34.7744
				126.714														-29.8169
				208.609														-28.4651
				254.285														-34.5651
				506.991														-26.9176
