# Supplementary material for: Quantifying key drivers of marine pyrite burial flux and isotopic composition
Source: Research Square preprint supplement (doi:10.21203/rs.3.rs-4788953/v1), 2024-11-01
Supplement: Supplementary file 148 [file B1999_CB.xlsx]

## Sheet: Sheet1
reference	latitude_dd	longitude_dd	water_depth_m	depth_cm	age_yr	porosity_vol_	SO4_mM	H2S_mM	CH4_mM	S_py_wt_	S_AVS_wt_	S0_wt_	TOC_wt_	Fe_HR_wt_	Fe_tot_wt_	d34S_SO4	d34S_H2S	d34S_py	lnSRR_molL_1d_1	sed_rate_cmky
Bruechert1999	30.1389	-85.5689	8	-0.555062			22.9992
				0.679932			20.8032
				2.52329			18.7093
				3.45144			16.8123
				4.36512			16.8153
				5.28565			15.9184
				6.65846			15.6229
				7.41834			15.8254
				8.78277			16.6298
				11.8383			15.3399
				13.8141			15.8464
				15.9354			17.2533
				19.7432			17.1658
				24.7646			17.6823
				29.7899			17.6988
				34.8151			17.7153
				39.6835			18.3313
				44.6996			19.5478
				49.7241			19.6643
				0.298507												21.3366
				1.19403												22.2277
				2.38806												25.3465
				5.22388												32.3267
				6.41791												33.3663
				7.01493												34.2574
				8.0597												35.1485
				10.4478												35.1485
				12.2388												35.1485
				13.8806												34.5545
				16.1194												33.8119
				17.9104												33.6634
				20												33.2178
				25.3731												33.2178
				30.1493												33.8119
				35.0746												33.5149
				40.1493												33.0693
				44.9254												33.0693
				49.8507												32.1782
				0.914634									5.42177
				2.0122									5.35374
				2.7439									5.21769
				3.29268									4.7415
				4.20732									4.87755
				5.4878									4.60544
				6.58537									5.01361
				7.31707									4.67347
				8.59756									4.7415
				9.69512									4.7415
				11.8902									4.60544
				13.9024									5.01361
				15.9146									4.40136
				17.9268									3.85714
				19.939									3.72109
				25.061									3.65306
				30									3.17687
				35.122									3.51701
				40.2439									3.31292
				44.8171									3.04082
				50.122									3.10884
				0.5											0.82
				1.5											0.51
				2.5											0.48
				3.5											0.45
				4.5											0.47
				5.5											0.27
				6.5											0.44
				7.5											0.35
				8.5											0.5
				11											0.45
				15											0.4
				17											0.33
				22.5											0.15
				32.5											0.16
				42.5											0.11
				47.5											0.17
