# Supplementary material for: Quantifying key drivers of marine pyrite burial flux and isotopic composition
Source: Research Square preprint supplement (doi:10.21203/rs.3.rs-4788953/v1), 2024-11-01
Supplement: Supplementary file 151 [file B1999_WB.xlsx]

## Sheet: Sheet1
reference	latitude_dd	longitude_dd	water_depth_m	depth_cm	age_yr	porosity_vol_	SO4_mM	H2S_mM	CH4_mM	S_py_wt_	S_AVS_wt_	S0_wt_	TOC_wt_	Fe_HR_wt_	Fe_tot_wt_	d34S_SO4	d34S_H2S	d34S_py	lnSRR_molL_1d_1	sed_rate_cmky
Bruechert1999	30.1519	-85.6398	8	-0.593893			28.099
				0.632725			27.0031
				1.41468			24.3056
				2.51415			19.9093
				3.42479			20.3122
				4.65826			18.3163
				5.26509			18.6183
				6.93713			19.0238
				7.70767			17.8263
				9.54646			16.3323
				11.8276			16.7398
				13.6474			17.7458
				15.8052			14.3529
				17.7643			17.0593
				19.7485			16.4658
				24.7768			16.0823
				29.9528			16.2993
				34.8242			16.5153
				39.7003			19.6643
				44.7263			16.0479
				49.7485			16.4643
				54.9306			15.8814
				1.79104												25.495
				4.02985												30.9901
				4.92537												33.9604
				6.26866												35
				7.01493												35.8911
				8.0597												37.6733
				9.10448												39.7525
				10.1493												40.495
				12.2388												41.8317
				14.0299												42.2772
				16.1194												42.4257
				18.0597												43.1683
				20												42.7228
				24.9254												43.4653
				30.1493												43.4653
				34.9254												43.3168
				39.8507												43.9109
				45.0746												43.3168
				49.8507
				54.9254												43.4653
				0.164597									20.734
				1.46192									19.8644
				2.21457									18.2595
				3.32785									17.3886
				4.62517									16.519
				5.02319									13.5947
				6.50456									12.7262
				8.33159									14.0551
				9.25782									13.4757
				11.2509									16.5618
				17.7106									14.8475
				24.5833									8.74554
				29.382									7.45948
				34.0072									5.14792
				40.0853									4.74818
				44.6955									3.89993
				49.5077									1.29689
				54.8332									2.50205
				0.5											0.57
				1.5											0.74
				2.5											0.88
				3.5											0.62
				4.5											0.41
				5.5											0.69
				6.5											0.57
				7.5											0.47
				8.5											0.71
				11											0.55
				15											0.46
				17											0.58
				22.5											0.27
				32.5											0.1
				42.5											0.07
				47.5											0.06
