# Supplementary material for: Quantifying key drivers of marine pyrite burial flux and isotopic composition
Source: Research Square preprint supplement (doi:10.21203/rs.3.rs-4788953/v1), 2024-11-01
Supplement: Supplementary file 154 [file B2000_LD.xlsx]

## Sheet: Sheet1
reference	latitude_dd	longitude_dd	water_depth_m	depth_cm	age_yr	porosity_vol_	SO4_mM	H2S_mM	CH4_mM	S_py_wt_	S_AVS_wt_	S0_wt_	TOC_wt_	Fe_HR_wt_	Fe_tot_wt_	d34S_SO4	d34S_H2S	d34S_py	lnSRR_molL_1d_1	sed_rate_cmky
Boettcher2000	19.1467	58.3267	221	-5.70776									2.20561							52
				6.84931									2.18692							52
				18.2648									2.56075							10
				23.9726									5.36449							10
				30.8219									2.99065							10
				38.8128									4.74766							10
				38.8128									2.63551							10
				44.5206									3.96262							10
				49.0868									1.88785							10
				76.484									1.5514							52
				126.712									1.71963							52
				159.817									2.39252							52
				159.817									5.14019							52
				163.242									4.63551							10
				171.233									4.8785							10
				172.374									2.82243							10
				178.082									1.86916							10
				180.365									3.08411							10
				187.215									2.91589							10
				187.215									5.45794							10
				189.498									1.51402							10
				188.356									1.27103							10
				191.781									1.25234							10
				195.205									0.897196
				202.055									0.841121
				214.612									1.08411
				221.461									0.878505
				232.877									0.803738
				246.575									0.766355
				256.849									0.766355
				268.265									0.672897
				276.256									0.560748
				284.247									0.485981
				293.379									0.429907
				303.653									0.542056
				310.502									0.392523
				320.776									0.373832
				345.89									0.411215
				355.023									0.485981
				361.872									0.560748
				377.854									0.429907
				389.269									0.429907
				398.402									0.448598
				405.251									0.598131
				409.817									0.934579
				415.525									1.02804
				420.091									1.15888
				428.082									0.672897
				429.224									0.542056
				441.781									0.46729
				482.877									0.46729
				-4.54545											4.30435
				4.54545											4.30435
				18.1818											4.13044
				21.5909											4.32609
				35.2273											4.28261
				36.3636											4.43478
				46.5909											6.28261
				51.1364											4.43478
				127.273											5.04348
				159.091											4.43478
				164.773											5.08696
				175											4.3913
				186.364											4.1087
				187.5											5.43478
				196.591											5.06522
				207.955											4.5
				215.909											5.45652
				246.591											4.54348
				317.045											5.36956
				355.682											5.36956
				361.364											5.67391
				367.045											5.19565
				402.273											4.63044
				421.591											5.02174
				430.682											5.45652
				481.818											5.19565
