# Supplementary material for: Quantifying key drivers of marine pyrite burial flux and isotopic composition
Source: Research Square preprint supplement (doi:10.21203/rs.3.rs-4788953/v1), 2024-11-01
Supplement: Supplementary file 157 [file B2000b_DT.xlsx]

## Sheet: Sheet1
reference	latitude_dd	longitude_dd	water_depth_m	depth_cm	age_yr	porosity_vol_	SO4_mM	H2S_mM	CH4_mM	S_py_wt_	S_AVS_wt_	S0_wt_	TOC_wt_	Fe_HR_wt_	Fe_tot_wt_	d34S_SO4	d34S_H2S	d34S_py	lnSRR_molL_1d_1	sed_rate_cmky
Boettcher2000b	53.4519	8.09439	0	0.5									3.33
				1.5									3.11
				2.5									2.83
				3.5									2.2
				4.5									1.74
				5.5									1.53
				7									1.08
				9									1.11
				11									1.09
				13									1.05
				15									1.01
				17									1.08
				19									1.9
				21									1.65
