# Supplementary material for: Quantifying key drivers of marine pyrite burial flux and isotopic composition
Source: Research Square preprint supplement (doi:10.21203/rs.3.rs-4788953/v1), 2024-11-01
Supplement: Supplementary file 160 [file B2001_D.xlsx]

## Sheet: Sheet1
reference	latitude_dd	longitude_dd	water_depth_m	depth_cm	age_yr	porosity_vol_	SO4_mM	H2S_mM	CH4_mM	S_py_wt_	S_AVS_wt_	S0_wt_	TOC_wt_	Fe_HR_wt_	Fe_tot_wt_	d34S_SO4	d34S_H2S	d34S_py	lnSRR_molL_1d_1	sed_rate_cmky
Bruechert2001	78.2788	15.1888		0.440098														-15
				1.32029														-22.0423
				2.34719														-23.8028
				3.37408														-26.9718
				4.40098														-25.5634
				5.42787														-23.0986
				6.38142														-25.5634
				8.50856														-26.9718
				10.489														-22.0423
				12.4694														-22.0423
				14.5232														-22.7465
				24.4988														-27.6761
				1.30452							-29.1908
				2.33551							-31.9347
				3.36497							-33.637
				4.39036							-32.5616
				5.40963							-27.3198
				6.43756							-27.9804
				10.3231							-26.4638
				12.4513							-27.0883
				14.5102							-30.4928
				24.5664							-35.0234
