# Supplementary material for: Quantifying key drivers of marine pyrite burial flux and isotopic composition
Source: Research Square preprint supplement (doi:10.21203/rs.3.rs-4788953/v1), 2024-11-01
Supplement: Supplementary file 163 [file B2001_F.xlsx]

## Sheet: Sheet1
reference	latitude_dd	longitude_dd	water_depth_m	depth_cm	age_yr	porosity_vol_	SO4_mM	H2S_mM	CH4_mM	S_py_wt_	S_AVS_wt_	S0_wt_	TOC_wt_	Fe_HR_wt_	Fe_tot_wt_	d34S_SO4	d34S_H2S	d34S_py	lnSRR_molL_1d_1	sed_rate_cmky
Bruechert2001	79.1999	11.8185		0.513447														-9.44444
				1.39364														-9.44444
				2.34719														-8.40278
				3.52078														-9.79167
				4.54768														-9.79167
				6.52812														-9.44444
				8.43521														-12.5694
				10.5623														-10.8333
				12.3961														-7.70833
				14.5966														-12.5694
				19.5844														-11.5278
				24.5721														-8.40278
				29.5599														-14.3056
				10.5623
				12.5428
				14.6699
				19.5844
				24.6455
				29.5599
											-23.6806
											-21.9444
											-24.7222
											-23.6806
											-21.5972
											-23.3333
