# Supplementary material for: Quantifying key drivers of marine pyrite burial flux and isotopic composition
Source: Research Square preprint supplement (doi:10.21203/rs.3.rs-4788953/v1), 2024-11-01
Supplement: Supplementary file 166 [file B2001_G.xlsx]

## Sheet: Sheet1
reference	latitude_dd	longitude_dd	water_depth_m	depth_cm	age_yr	porosity_vol_	SO4_mM	H2S_mM	CH4_mM	S_py_wt_	S_AVS_wt_	S0_wt_	TOC_wt_	Fe_HR_wt_	Fe_tot_wt_	d34S_SO4	d34S_H2S	d34S_py	lnSRR_molL_1d_1	sed_rate_cmky
Bruechert2001	79.2821	11.6465		0.368635														10.3241
				1.39704														9.61653
				2.42593														9.24675
				3.5224														4.82082
				4.46982														-0.951838
				6.43918														-11.8238
				7.38462														-18.9477
				9.51743														-18.6761
				11.5727														-21.1048
				13.485														-20.8263
				15.6133														-23.5951
				19.5053														-27.0943
				7.44672							-26.7199
				9.35199							-31.171
				11.4128							-29.8836
				13.3975							-30.283
				15.3773							-34.0607
				19.4949							-34.1885
