# Supplementary material for: Quantifying key drivers of marine pyrite burial flux and isotopic composition
Source: Research Square preprint supplement (doi:10.21203/rs.3.rs-4788953/v1), 2024-11-01
Supplement: Supplementary file 169 [file BA1.xlsx]

## Sheet: Sheet1
reference	latitude_dd	longitude_dd	water_depth_m	depth_cm	age_yr	porosity_vol_	SO4_mM	H2S_mM	CH4_mM	S_py_wt_	S_AVS_wt_	S0_wt_	TOC_wt_	Fe_HR_wt_	Fe_tot_wt_	d34S_SO4	d34S_H2S	d34S_py	lnSRR_molL_1d_1	sed_rate_cmky
Antler2013	33.1299	34.9027	593	0.351288			29.7486
				3.87318			29.9885
				6.65646			29.2062
				9.44875			28.6804
				13.6462			28.1479
				19.9604			27.862
				25.563			27.3229
				1.06506
				4.56973												20.7767
				8.08351												20.7682
				12.3028												21.2793
				17.223												22.0483
				20.7413												22.8157
				24.9606												23.5865
				27.7779												24.3555
																25.128
