# Supplementary material for: Quantifying key drivers of marine pyrite burial flux and isotopic composition
Source: Research Square preprint supplement (doi:10.21203/rs.3.rs-4788953/v1), 2024-11-01
Supplement: Supplementary file 172 [file BAS3.xlsx]

## Sheet: Sheet1
reference	latitude_dd	longitude_dd	water_depth_m	depth_cm	age_yr	porosity_vol_	SO4_mM	H2S_mM	CH4_mM	S_py_wt_	S_AVS_wt_	S0_wt_	TOC_wt_	Fe_HR_wt_	Fe_tot_wt_	d34S_SO4	d34S_H2S	d34S_py	lnSRR_molL_1d_1	sed_rate_cmky
Boettcher1998b	7.37776	53.0117		-0.26779			27.275
				0.722348			26.7745
				2.69996			26.0439
				4.76469			26.4718
				6.63617			26.5132
				8.80816			26.0532
				10.7782			26.0948
				12.7546			25.48
				14.9099			26.7188
				16.8868			26.0654
				18.7537			26.5702
				20.9226			26.419
				26.83			26.814
				28.7985			27.0101
				0.979107												20.7132
				2.75398												20.5614
				6.88875												20.8765
				8.95842												20.8025
				10.8322												20.6122
				12.8984												20.8856
				14.7733												20.5796
				16.94												20.6601
				26.8908												20.6365
				1.30064									0.0769422
				4.25823									0.054695
				7.3199									0.0539613
				11.1831									0.0991894
				13.3612									0.120206
				16.2405									0.181054
				19.2551									0.389563
				22.3137									0.376522
				25.4992									0.0772972
				28.4074									0.255062
				31.3848									0.31281
