# Supplementary material for: Quantifying key drivers of marine pyrite burial flux and isotopic composition
Source: Research Square preprint supplement (doi:10.21203/rs.3.rs-4788953/v1), 2024-11-01
Supplement: Supplementary file 175 [file BB01.xlsx]

## Sheet: Sheet1
reference	latitude_dd	longitude_dd	water_depth_m	depth_cm	age_yr	porosity_vol_	SO4_mM	H2S_mM	CH4_mM	S_py_wt_	S_AVS_wt_	S0_wt_	TOC_wt_	Fe_HR_wt_	Fe_tot_wt_	d34S_SO4	d34S_H2S	d34S_py	lnSRR_molL_1d_1	lnMOR_molL_1d_1	sed_rate_cmky
Liu2020b	55.382	15.4612	96	0			16.55	0								21.8
				2.5		0.92							6.5					-28.3
				3			14.81	0								23.6
				5			14.48	0								25.6
				7			12.72	0.02								27.6	-24.9
				7.5		0.92							5.5					-26.4
				10			11.15	0.22								32.7	-21.4
				12.5		0.9	9.44	0.47					4.6			37.4	-19.7	-22.9
				15			8.58									39.9	-13.2
				17.5		0.9							4.7					-19.7
				20			7.11	0.67								44.9
				22.5		0.89							4.6					-25.1
				25			5.19	0.91								51.1	-3.2
				27.5		0.89							4.7					-23.3
				30			4.84	1.05								53.3	4.8
				32.5		0.89							4.5					-26.5
				38			2.38	1.69								69.8	14.8
				40		0.88							4.8					-21.9
				48			0.93	1.87								74.1	19.5
				50		0.88							5					-20.1
				58			0.13	1.97									18
				60		0.88							5.2					-10.4
				68			0.05	1.86									18.2
				70		0.88							5.3					-16.1
				78			0.01	1.61									17.5
				80		0.88							7					-26.9
				88			0	1.22									17.3
				98			0	1.22									17.9
