# Supplementary material for: Quantifying key drivers of marine pyrite burial flux and isotopic composition
Source: Research Square preprint supplement (doi:10.21203/rs.3.rs-4788953/v1), 2024-11-01
Supplement: Supplementary file 178 [file BB02.xlsx]

## Sheet: Sheet1
reference	latitude_dd	longitude_dd	water_depth_m	depth_cm	age_yr	porosity_vol_	SO4_mM	H2S_mM	CH4_mM	S_py_wt_	S_AVS_wt_	S0_wt_	TOC_wt_	Fe_HR_wt_	Fe_tot_wt_	d34S_SO4	d34S_H2S	d34S_py	lnSRR_molL_1d_1	lnMOR_molL_1d_1	sed_rate_cmky
Liu2020b	55.388	15.4667	96	0			16.36	0								22
				1														-31.6
				3			15.93	0								22.1		-31.2
				5		0.92		0.33					6.4			38.1	-22.9	-31.1
				5.5			13.96	0.02								24.5
				7														-28
				7.5			13.55	0.03								26.4
				9														-29.8
				10		0.86							5
				10.5			11.23	0.22								33.1	-18.6
				11				1.69
				12.5			9.45	0.54								47.5	-17.6	-29
				17.5			7.56	0.73								51.7	-13.6	-26
				20		0.91							4.2
				22.5			6.69	1.34								74.3	-8.8	-28.1
				24				2.1								72.5
				25			3.64	1.88								71.8	-0.6
				27.5														-26.6
				30		0.77							4.3
				32.5														-33.4
				36			3.11	2.18								85.6	3.4
				37		0.85							6.4
				37.5														-32.4
				40		0.9							4.2					-35.8
				42.5														-27.7
				45			1.2	2.03								94.2	16.1
				45.5			1.94	2.4								94.6	11.7
				49			1	2.53									23.7
				50		0.88							4.6					-35.8
				52			1.05	1.77
				55.5			1.13	3.11									18
				56		0.82							6
				60		0.85							4.6					-28.5
				62														-36
				65			0.17	2.32									24.7
				65.5			0.08	2.37									25.7
				66			0.83	2.39									26.1
				70		0.88							5
				72			0	2.36
				75.5			0.44	2.53									22.8
				76		0.86							5.8
				80		0.87							6.5					-32.5
				90		0.86							5.8
				92			0	2.99
				95		0.8	0.02	1.81					4.5				24.9
				99			0.01	2.12									26.2	-26
				105			0.01	1.6									23.6
				112			0	1.95
				114		0.83							4.6
				115			0.02	1.66									23.5
				118														-29
				125			0.11	1.83									24
				132			0	1.7
				132			0.03										24.4
				133		0.81							4.8
				135			0.01	1.4									24
				138														-30
				145			0.02	1.72									22.5
				154		0.8							4.3
				155			0.02	1.38									24.2
				156														-30.6
				158				1.49
				161			0.12	1.68									25.1
				165			0.03	1.9									23.7
				166														-28.2
				174		0.84							4.6
				175			0.01	1.58									24	-34.5
				178			0	1.73
				178			0.01	1.52									24.6
				189			0.09	1.09									22.8
				194		0.82							4.2					-35
				198			0	1.38
				202			0.01	1.41									25
				209			0.01	1.32									23.9
				214		0.81							4.5
				216														-31.4
				218			0	1.35
				229			0.01	0.87									24.4
				234		0.76							4.7
				235														-33.9
				238			0.02	0.99
				244			0.07	0.73									24.3
				249			0.07	1.15									23.5
				254		0.83							4.6
				256														-36.2
				258			0	0.9
				275			0.01	0.98									23.2
				276		0.79							4.9
				277														-36
				278			0.18	0.74
				285			0.41	0.86
				296		0.81							5.4
				297														-37
				298			0	0.5
				306			0	0.95									23.6
				315			0.01	0.53									24.1
				316		0.82							5.7
				318			0	0.73
				319														-39
				336		0.79							3.9
				338			0	0.43
				339														-39.2
				347			0.01	0.48									23.2
				355			0	0.09									19.7
				356		0.79							3.2
				358			0.01	0.37
				360														-35.3
				376		0.81	0	0					2.1					-25.4
				378			0.02	0.08
				387			0	0.11									22.2
				396		0.79							1.5
				398			0.03	0.01
				399														0.8
				414		0.81							1.1
				416			0	0
				418			0.01	0
				430			0
				434		0.78							0.6
				437														3.7
				438			0.01	0
				454		0.75							0.9
				456			0.03	0
				457														9.6
				458			0.04	0
				464			0
				474		0.73							0.6
				476			0.16	0								85.7
				478			0.01	0										-5.7
				494		0.75							0.6
				497														-9.9
				498			0.31	0
				504			0.16
				515		0.75							0.5
				516			0.39	0								81.9
				518														3.3
				518			0.75	0
				531		0.75							0.6
				540			0.33									80.7
				547		0.74							0.5
				549
				556			0.62	0								80
				569		0.75							0.5
				578			0.49									80.5
				587		0.73							0.6
				598			0.57									79.5
				600														-12.5
				609		0.67							0.5
				638			0.79									77.5	22.9
