# Supplementary material for: Quantifying key drivers of marine pyrite burial flux and isotopic composition
Source: Research Square preprint supplement (doi:10.21203/rs.3.rs-4788953/v1), 2024-11-01
Supplement: Supplementary file 181 [file BB05.xlsx]

## Sheet: Sheet1
reference	latitude_dd	longitude_dd	water_depth_m	depth_cm	age_yr	porosity_vol_	SO4_mM	H2S_mM	CH4_mM	S_py_wt_	S_AVS_wt_	S0_wt_	TOC_wt_	Fe_HR_wt_	Fe_tot_wt_	d34S_SO4	d34S_H2S	d34S_py	lnSRR_molL_1d_1	lnMOR_molL_1d_1	sed_rate_cmky
Liu2020b	55.407	15.4758	95	0			16.78	0								22.5
				1														-34.8
				2.5			15.99	0
				3														-34.8
				4.5			16.75	0
				5.5														-33.6
				7			14.27	0.04								26.9
				8.5														-31.6
				9.5			12.77	0.23								31.1	-30.9
				10		0.95							4.7					-32.1
				11
				12			11.67	0.41									-30.9
				12.5														-32
				14.5			11.18	0.44								36	-27.7
				17		0.9	10.37	0.51					5.3
				17.5		0.95							4					-32.5
				19.5			10.14	0.55								40.7	-26
				22			9.6	0.66									-24.4
				22.5														-39.6
				22.5														-39.3
				27			9.54	0.83								43.5	-21.9
				27.5		0.91							4.4					-37.3
				31
				32			7.89	1.28									-20
				32.5														-32.7
				37			8.73	0.97								46.2	-18.7
				37.5		0.93							5.2					-40.5
				42			7.05	1.27									-16.8
				42.5														-40.3
				43														-31.1
				47			6.69	1.54								56.1	-15.5
				47.5		0.96							5.1					-38
				50														-39.4
				51
				52			6.29	1.55									-13.5
				57			6.21	1.71								63	-11.8	-36.4
				57.5		0.93							5.9					-39.8
				60														-39.8
				62			5.58	1.71									-9.9
				67			4.85	1.74								69.3	-7.7
				67.5		0.93							5.2					-40.4
				70														-39.5
				72			4.65	2.03									-5.9
				77		0.88	4.42	1.87					4.5			73.4	-4.5
				77.5		0.92							4.9
				80														-37.9
				80														-39.6
				82			3.97	1.91									-2.8
				87			3.6	2								77	-1.8
				87.5		0.89							4.6
				90														-36.3
				91			3.01									81.7	0
				92			3.59	1.82									0.2
				97			3.23	1.91								80.6	1.2
				97.5		0.88							4.1
				100														-37.4
				100														-37.1
				107.5		0.85							4.5
				110			2.72									85	2.2	-36.9
				117		0.89							3.8					-37.7
				131			2.22									87.5	4.8
				142														-36.3
				151			1.92									91.5	7.5
				165														-38.3
				172			1.71	1.77								93.5	9.6
				177														-39.3
				178		0.85							5.6
				207			1.12	1.54								99	12.1
				217		0.9							4.7
				234														-38.6
				252			0.49	1.42								104.4	16.4
				268														-37.1
				271		0.8							3.8
				287			0.28	0.79									21.2
				310		0.83							2.1					-25.7
				328			0.04	0.9									25
				338														-11.3
				367			0	0.18									24
				378														13.4
				379		0.82							1.3
				407			0.02	0
				417		0.87							0.8
				424														16.2
				451			0.15	0								124.2
				459														6.1
				472		0.79							0.7
				486			0.26	0								120.1
				501														-6.3
				515		0.79							0.5
				526			0.47	0								111
				542														-10.5
				557			0.83	0
				576		0.73							0.4
				591														6.6
				606			0.92	0								105.8
				617		0.63							0.5
				631
				651			1.07	0								98.1
				668		0.66							0.5					-9.3
				685			1.11	0								94.9
				700		0.79							0.4
				706
				731			1.27	0								91.2
