# Supplementary material for: Quantifying key drivers of marine pyrite burial flux and isotopic composition
Source: Research Square preprint supplement (doi:10.21203/rs.3.rs-4788953/v1), 2024-11-01
Supplement: Supplementary file 184 [file BCCF10_01.xlsx]

## Sheet: Sheet1
reference	latitude_dd	longitude_dd	water_depth_m	depth_cm	age_yr	porosity_vol_	SO4_mM	H2S_mM	CH4_mM	S_py_wt_	S_AVS_wt_	S0_wt_	TOC_wt_	Fe_HR_wt_	Fe_tot_wt_	d34S_SO4	d34S_H2S	d34S_py	lnSRR_molL_1d_1	sed_rate_cmky
Diaz2012	-23.4277	-41.7205	142	0.976744									0.916901
				1.95349									0.966197
				2.86512									0.926761
				3.90698									0.828169
				4.94884									0.926761
				5.92558									0.828169
				6.96744									0.916901
				7.94419									1.68592
				8.98605									1.22254
				9.96279									1.62676
				10.9395									1.15352
				11.8512									1.32113
				12.9581									1.02535
				13.8698									1.49859
				14.8465									1.03521
				15.7581									1.03521
				16.8651									1.38028
				17.8419									1.30141
				18.8837									0.966197
				19.8605									1.24225
				20.7721									0.966197
				21.9442									1.46901
				22.9209									1.20282
				23.8977									0.907042
				24.9395									0.956338
				0.988115			27.1978
				2.22332			26.1847
				3.26086			25.7402
				5.71524			26.1936
				8.04687			25.6305
				10.303			26.7338
				12.7022			25.7237
				18.5836			26.2265
				24.4744			25.266
				0.903226												21.5122
				2.90323												20.7561
				3.80645												21.122
				4.83871												21.1707
				6.90323												21.5366
				8.90323												21.3171
				16												21.8049
				20.9032												21.9756
				24												21.3902
				1.03464														-29.83
				7.11316														-25.4575
				8.85912														-34.8826
				10.9284														-35.9514
				12.933														-39.4494
				14.9376														-40.7126
				17.0716														-39.3522
				19.0115														-41.004
				20.9515														-41.1012
				23.0208														-40.9069
				24.9607														-41.7814
