# Supplementary material for: Quantifying key drivers of marine pyrite burial flux and isotopic composition
Source: Research Square preprint supplement (doi:10.21203/rs.3.rs-4788953/v1), 2024-11-01
Supplement: Supplementary file 187 [file BCCF10_04.xlsx]

## Sheet: Sheet1
reference	latitude_dd	longitude_dd	water_depth_m	depth_cm	age_yr	porosity_vol_	SO4_mM	H2S_mM	CH4_mM	S_py_wt_	S_AVS_wt_	S0_wt_	TOC_wt_	Fe_HR_wt_	Fe_tot_wt_	d34S_SO4	d34S_H2S	d34S_py	lnSRR_molL_1d_1	sed_rate_cmky
Diaz2012	-23.2787	-41.7929	120	1.04186									1.94225
				1.88837									1.8831
				2.93023									1.86338
				3.90698									1.79437
				4.8186									1.68592
				6.90233									1.4493
				7.87907									1.67606
				8.85581									1.46901
				9.96279									1.70563
				11.0047									1.59718
				11.9163									1.82394
				12.9581									1.55775
				13.9349									1.93239
				14.9767									1.51831
				15.8884									1.93239
				16.9953									1.4493
				17.9721									1.77465
				18.8837									1.48873
				19.8605									1.48873
				20.9023									1.30141
				21.8791									1.65634
				22.986									1.43944
				23.9628									1.99155
				24.8093									1.42958
				25.8512									0.956338
				26.893									1.48873
				0.903226												22.1463
				1.93548												22.1463
				3.80645												22.1463
				4.96774												21.5366
				6.90323												21.9512
				8.70968												22.2683
				15.9355												22.2683
				21.0323												23.0244
				26												21.3902
				0.969977														-30.7045
				4.00924														-32.3563
				5.04388														-33.2308
				6.98383														-36.8259
				8.98845														-36.4372
				13.0624														-37.8947
				14.9376														-39.2551
				17.0716														-37.7976
				19.0115														-38.5749
				21.0162														-39.3522
				22.9561														-41.7814
				25.0254														-40.8097
				26.9654														-40.5182
