# Supplementary material for: Quantifying key drivers of marine pyrite burial flux and isotopic composition
Source: Research Square preprint supplement (doi:10.21203/rs.3.rs-4788953/v1), 2024-11-01
Supplement: Supplementary file 190 [file BCCF10_09.xlsx]

## Sheet: Sheet1
reference	latitude_dd	longitude_dd	water_depth_m	depth_cm	age_yr	porosity_vol_	SO4_mM	H2S_mM	CH4_mM	S_py_wt_	S_AVS_wt_	S0_wt_	TOC_wt_	Fe_HR_wt_	Fe_tot_wt_	d34S_SO4	d34S_H2S	d34S_py	lnSRR_molL_1d_1	sed_rate_cmky
Diaz2012	-23.1921	-41.8561	117	0.818158									2.24923
				1.71354									1.8849
				2.69042									1.77559
				3.6765									1.81346
				4.7349									1.95917
				5.70566									1.75174
				6.61758									1.65234
				7.81816									1.97449
				8.85878									1.83565
				9.84057									1.80484
				10.6949									1.83308
				11.7943									1.58622
				12.7191									1.69287
				13.7573									1.51478
				14.8666									1.42491
				15.7932									1.561
				16.9595									1.33367
				17.5631									1.54871
				18.7435									1.54706
				19.9153									1.40804
				20.7788									1.58347
				21.9695									1.74862
				22.8159									1.64931
				0.92345			27.1976
				1.96493			26.1434
				3.18988			26.7156
				4.23057			25.7833
				5.5846			26.3966
				7.91464			26.0773
				10.1787			25.9611
				12.565			26.9428
				18.3959			25.266
				24.2124			25.7937
				0.645161												21.8049
				1.54839												22.0488
				2.58065												21.7317
				3.74194												21.4878
				4.64516												21.8049
				6.70968												22.1463
				8.64516												22.2195
				10.7097												22.3415
				15.6774												21.3902
				20.6452												22.9512
				0.840647														-25.8462
				3.62125														-30.1215
				4.65589														-26.8178
				6.66051														-29.3441
				8.79446														-29.3441
				10.7344														-37.5061
				12.8684														-36.5344
				14.873														-37.1174
				16.8129														-38.2834
				18.9469														-37.3117
				20.8222														-36.3401
				22.9561														-31.5789
				27.6767														-40.5182
