# Supplementary material for: Quantifying key drivers of marine pyrite burial flux and isotopic composition
Source: Research Square preprint supplement (doi:10.21203/rs.3.rs-4788953/v1), 2024-11-01
Supplement: Supplementary file 193 [file BCCF10_15.xlsx]

## Sheet: Sheet1
reference	latitude_dd	longitude_dd	water_depth_m	depth_cm	age_yr	porosity_vol_	SO4_mM	H2S_mM	CH4_mM	S_py_wt_	S_AVS_wt_	S0_wt_	TOC_wt_	Fe_HR_wt_	Fe_tot_wt_	d34S_SO4	d34S_H2S	d34S_py	lnSRR_molL_1d_1	sed_rate_cmky
Diaz2012	-23.0546	-41.9298	80	0.785047									1.09252
				1.8972									1.23972
				2.94393									0.95514
				3.85981									1.32804
				4.7757									1.3771
				5.82243									1.61262
				6.80374									1.30841
				7.85047									1.23972
				8.8972									1.32804
				9.81308									1.59299
				10.9252									1.10234
				11.7757									1.73037
				12.8224									1.34766
				13.8692									1.56355
				14.8505									1.32804
				15.8318									1.8285
				16.9439									1.47523
				17.9252									1.50467
				18.8411									1.72056
				20.0187									1.45561
				1.04989			27.6451
				2.08952			26.8754
				3.38099			27.1633
				4.61436			26.4347
				5.71156			26.7627
				8.04029			26.6467
				10.3648			27.1811
				12.764			26.171
				18.6448			26.7551
				0.962587												18.6872
				1.89878												21.8233
				2.99439												22.1679
				3.95988												22.5857
				4.99268												22.7587
				6.94847												21.2924
				8.94543												22.0057
				11.0126												22.2048
				16.1161												22.678
				18.8416												22.9512
				0.969977														-27.8866
				1.93995														-30.413
				2.90993														-29.6356
				3.94457														-29.0526
				4.91455														-32.3563
				6.91917														-34.2996
				8.92379														-34.2024
				10.9931														-30.996
				13.127														-31.7733
				16.8129														-36.0486
				18.8822														-36.3401
