# Supplementary material for: Quantifying key drivers of marine pyrite burial flux and isotopic composition
Source: Research Square preprint supplement (doi:10.21203/rs.3.rs-4788953/v1), 2024-11-01
Supplement: Supplementary file 199 [file BS4-14GC.xlsx]

## Sheet: Sheet1
reference	latitude_dd	longitude_dd	water_depth_m	depth_cm	age_yr	porosity_vol_	SO4_mM	H2S_mM	CH4_mM	S_py_wt_	S_AVS_wt_	S0_wt_	TOC_wt_	Fe_HR_wt_	Fe_tot_wt_	d34S_SO4	d34S_H2S	d34S_py	lnSRR_molL_1d_1	sed_rate_cmky
Calvert1996	43.0783	34.0267		1.3						0.68		1.45	4.99		2.34	-27.74		-33.95
				7.8						0.82		1.35	5.09		4.03	-26.83		-33.21
				14.3						0.88		1.09	1.89		3.99	-24.93		-27.32
				20.9						0.65		1.06	1.98		4.06	-20.84		-24.74
				27.4						0.86		1.3	2.06		4.02	-17.05		-22
				33.9						0.62		0.95	2.1		3.99	-17		-21.4
				40.4						0.92		1.16	2.18		3.99	-17.78		-21.26
				53.5						0.9		1.24	2.27		3.97	-18.04		-19.8
				60						0.89		1.39	6.85		3.5	-24.46		-25.16
				66.5						0.97		1.58	7.71		3.71	-31.4		-32.52
				73						1.93		2.68	7.13		4.44	-33.14		-37.39
				79.5						2.24		2.59	10.71		3.29	-21.55		-36.51
				86.1						1.33		2.19	15.43		3.4	-23.63		-29
				92.6						0.84		1.6	14.83		3.18	-19.17		-25.38
				99.1						1.66		2.32	4.84		4.03	-26.55		-32.72
				105.6						0.83		1.08	0.79		4.28	-26.77		-30
				118.7						0.74		1.01	0.8		4.17	-9.85		-11.89
				144.7						0.91		1.24	0.97		5.19	12.83		11.82
				162.5						0.79		1.26	0.93		4.97	10.75		14.56
				185.2						0.72		1.09	1.04		4.95	16.84		16.89
				207.9						0.69		1.02	0.94		4.73	17.14		17.21
				230.7						1.01		1.34	2.24		5.18	10.82		12.69
				253.4						1.02		1.35	0.85		4.4	15.79		16.28
				270.4						1.24		1.71	2.56		4.81	-16.9		-19
				293.1						0.13		0.7	1.41		2.83	15.96		14.58
				319.2						0.12		1.05	0.9		4.81	12.32		6.42
				343.2						0.11		0.83	0.89		4.81	12.58		8.59
				367.2						0.05		0.17	0.62		3.69	0.44		0.98
				391.2						0.05			1.01		3.38			0.95
				415.2						0.17		1.41	0.72		6.27	12.47		8.8
				433.1						0.03			0.68		4.49			-2.95
