# Supplementary material for: Quantifying key drivers of marine pyrite burial flux and isotopic composition
Source: Research Square preprint supplement (doi:10.21203/rs.3.rs-4788953/v1), 2024-11-01
Supplement: Supplementary file 202 [file C0004.xlsx]

## Sheet: Sheet1
reference	latitude_dd	longitude_dd	water_depth_m	depth_cm	age_yr	porosity_vol_	SO4_mM	H2S_mM	CH4_mM	S_py_wt_	S_AVS_wt_	S0_wt_	TOC_wt_	Fe_HR_wt_	Fe_tot_wt_	d34S_SO4	d34S_H2S	d34S_py	lnSRR_molL_1d_1	lnMOR_molL_1d_1	sed_rate_cmky
Riedinger2014	33.1964	136.714		273						0.25039	3.4e-05							-37.9
				554						0.33252	1.9e-05							-28.7
				909						0.73659	1.1e-05							-7
				1338						0.64677	2.3e-05							-2.8
				2001						0.49757	2e-05							-12.7
				2287						0.69357	2.7e-05							-15.7
				2952						1.37345	2.3e-05							-10
				3917						0.76305	7e-06							17
				4858						0.57882	1.3e-05							17.2
				273			25.3
				554			17.2
				909			13.9
				1338			6.9
				2001			0.9
				2287			0
				2952			0
				3917			0
				4858			0
				261									0.46
				542									0.47
				517									0.43
				920									0.59
				1099									0.49
				1327									0.49
				1755									0.42
				2297									0.27
				2597									0.39
				2962									0.47
				3552									0.41
				3907									0.47
				4645									0.46
				4848									0.61
