# Supplementary material for: Quantifying key drivers of marine pyrite burial flux and isotopic composition
Source: Research Square preprint supplement (doi:10.21203/rs.3.rs-4788953/v1), 2024-11-01
Supplement: Supplementary file 208 [file C0007.xlsx]

## Sheet: Sheet1
reference	latitude_dd	longitude_dd	water_depth_m	depth_cm	age_yr	porosity_vol_	SO4_mM	H2S_mM	CH4_mM	S_py_wt_	S_AVS_wt_	S0_wt_	TOC_wt_	Fe_HR_wt_	Fe_tot_wt_	d34S_SO4	d34S_H2S	d34S_py	lnSRR_molL_1d_1	lnMOR_molL_1d_1	sed_rate_cmky
Riedinger2014	33.0355	136.718		19159						0.18738	0.00056							23.1
				19993						0.05751	0.00375							-17.1
				20921						0.30156	0.01967							-8
				22165						0.3468	9.9e-05							-11.4
				22919						0.18993	0.00788							-12.5
				23865						0.19467	0.000338							-27.8
				24874						0.56959	0.0002							-21
				24910						0.21172	0.00235							-16.4
				25725						0.27334	0.00736							-10.8
				154			26.73
				284			25.44
				585			20.42
				988			16.16
				1417			12.33
				1701			10.57
				3161			8.28
				3303			8.11
				5529			10.92
				6479			11.28
				7456			10.59
				8663			13.24
				9211			9.76
				10282			11.84
				12987			13.71
				14911			28.07
				19159			1.55
				19993			8.08
				20921			5.22
				22165			6.15
				22919			5.82
				23865			3.17
				24874			3.93
				24910			5.47
				25725			1.49
				142									0.44
				273									0.35
				316									0.35
				381									0.41
				574									0.07
				893									0.43
				978									0.48
				1325									0.4
				1406									0.5
				1690									0.28
				3150									0.26
				3276									0.43
				3293									0.46
				3375									0.42
				5476									0.4
				5518									0.3
				5596									0.35
				5648									0.51
				6305									0.26
				6469									0.57
				6530									0.43
				6734									0.48
				7317									0.17
				7442									0.27
				7649									0.72
				8175									0.71
				8652									0.57
				8714									0.58
				9171									0.4
				9200									0.58
				9431									0.12
				10032									0.33
				10208									0.54
				10271									0.19
				10361									0.28
				10384									0.11
				12973									0.38
				14900									0.09
				19143									0.43
				19246									0.3
				19988									0.48
				20901									0.23
				22145									0.51
				22899									0.41
				23841									0.39
				24866									0.35
				24920									0.4
				25701									0.32
