# Supplementary material for: Quantifying key drivers of marine pyrite burial flux and isotopic composition
Source: Research Square preprint supplement (doi:10.21203/rs.3.rs-4788953/v1), 2024-11-01
Supplement: Supplementary file 211 [file C0008.xlsx]

## Sheet: Sheet1
reference	latitude_dd	longitude_dd	water_depth_m	depth_cm	age_yr	porosity_vol_	SO4_mM	H2S_mM	CH4_mM	S_py_wt_	S_AVS_wt_	S0_wt_	TOC_wt_	Fe_HR_wt_	Fe_tot_wt_	d34S_SO4	d34S_H2S	d34S_py	lnSRR_molL_1d_1	lnMOR_molL_1d_1	sed_rate_cmky
Riedinger2014	33.1968	136.718		155						1.17237	0.00266							1.4
				175						0.96438	0.000371
				438						0.71897	0.00197
				554						0.77733	0.00091
				694						0.9683	0.0019							-18.8
				846						1.06103	0.00135
				1231						0.81289	0.000902
				1555						0.86602	0.00112
				1785						1.01039	0.000434							9.9
				1852						0.74911	0.000942
				2205						0.85325	9.4e-05
				2310						0.53637	0.00222
				2930						1.08376	0.00145
				2950						1.5015	0.000461							-4.8
				3813						0.79796	0.000115
				3883						0.90935	6.8e-05
				4788						0.75022	7.3e-05							-13.6
				4938						0.0874	0.00773
				175			23.86
				554			7.78
				846			2.27
				1555			0
				1852			0
				2310			0
				2930			0
				3883			0
				4938			0
				164									0.7
				544									0.59
				835									0.65
				1544									0.49
				1606									0.41
				1841									0.45
				2299									0.37
				2541									0.4
				2919									0.42
				3089									0.47
				3520									0.53
				3873									0.55
				4076									0.52
				4736									0.45
