# Supplementary material for: Quantifying key drivers of marine pyrite burial flux and isotopic composition
Source: Research Square preprint supplement (doi:10.21203/rs.3.rs-4788953/v1), 2024-11-01
Supplement: Supplementary file 217 [file C2017_C1.xlsx]

## Sheet: Sheet1
reference	latitude_dd	longitude_dd	water_depth_m	depth_cm	age_yr	porosity_vol_	SO4_mM	H2S_mM	CH4_mM	S_py_wt_	S_AVS_wt_	S0_wt_	TOC_wt_	Fe_HR_wt_	Fe_tot_wt_	d34S_SO4	d34S_H2S	d34S_py	lnSRR_molL_1d_1	sed_rate_cmky
Cremiere2017	16.2758	-61.555	0.5	0	1976		24.8						17.5			20.9
				5			15						17.7			41.4	-1.6
				10			8.2						17.5			48.5	6.1
				12.5			3.9									50.5	10.7
				15									17.9
				17.5			0.6									70.6	13.6
				20									17.1
				22.5			0.4									77.9	15.7
				25			0.2						16.1				16.1
				30			0.2						15.3			52.1	16.6
				32.5			0.1										16.9
				35									12.7
