# Supplementary material for: Quantifying key drivers of marine pyrite burial flux and isotopic composition
Source: Research Square preprint supplement (doi:10.21203/rs.3.rs-4788953/v1), 2024-11-01
Supplement: Supplementary file 220 [file C2017_C2.xlsx]

## Sheet: Sheet1
reference	latitude_dd	longitude_dd	water_depth_m	depth_cm	age_yr	porosity_vol_	SO4_mM	H2S_mM	CH4_mM	S_py_wt_	S_AVS_wt_	S0_wt_	TOC_wt_	Fe_HR_wt_	Fe_tot_wt_	d34S_SO4	d34S_H2S	d34S_py	lnSRR_molL_1d_1	sed_rate_cmky
Cremiere2017	16.2758	-61.555	0.5	1	1974		22.5									23.5	-2.5
				3.5			18.5									27.6	0.2
				6			14.1									33.4	2.7
				8.5			8.7									39.2	6.1
				11			8									39.4	8.9
				18.5			0.3									84.9	15
				23.5			0.2										16.2
				28.5			0.5									90	15.2
				33.5			2.4									78.1	10.8
				38.5			0.8									84.1	13.6
				0									18.8
				5									17.7
				10									16.1
				15									15.8
				20									15.2
				25									14
				30									11.9
				35									10.8
