# Supplementary material for: Quantifying key drivers of marine pyrite burial flux and isotopic composition
Source: Research Square preprint supplement (doi:10.21203/rs.3.rs-4788953/v1), 2024-11-01
Supplement: Supplementary file 223 [file C2017_C3.xlsx]

## Sheet: Sheet1
reference	latitude_dd	longitude_dd	water_depth_m	depth_cm	age_yr	porosity_vol_	SO4_mM	H2S_mM	CH4_mM	S_py_wt_	S_AVS_wt_	S0_wt_	TOC_wt_	Fe_HR_wt_	Fe_tot_wt_	d34S_SO4	d34S_H2S	d34S_py	lnSRR_molL_1d_1	sed_rate_cmky
Cremiere2017	16.2758	-61.555	0.5	0	1989		26.9						13.7			20.8
				2.5			21.5									26.9	-7.6
				5			19.8						14.2			29.1	-6.8
				7.5			21									29.6	-11.3
				10			22.5						10.1			28.3	-16
				12.5			23.7									29.3	-20.3
				15			24.1						8.8			27.2	-21.8
				17.5			22.6									26.9	-21.9
				20			22.3						4.9			25.5	-24.1
							27.5									20.5
