# Supplementary material for: Quantifying key drivers of marine pyrite burial flux and isotopic composition
Source: Research Square preprint supplement (doi:10.21203/rs.3.rs-4788953/v1), 2024-11-01
Supplement: Supplementary file 229 [file DH5-1.xlsx]

## Sheet: Sheet1
reference	latitude_dd	longitude_dd	water_depth_m	depth_cm	age_yr	porosity_vol_	SO4_mM	H2S_mM	CH4_mM	S_py_wt_	S_AVS_wt_	S0_wt_	TOC_wt_	Fe_HR_wt_	Fe_tot_wt_	d34S_SO4	d34S_H2S	d34S_py	lnSRR_molL_1d_1	lnMOR_molL_1d_1	sed_rate_cmky
Zhu2016	27.7333	121.3	33	2.5									0.67		4.55			-27.1
				7.5									0.7		4.46			-27.3
				12.5									0.7		4.68			-28.3
				17.5									0.59		4.56			-29.3
				22.5									0.6		4.46			-29.4
				27.5									0.65		4.47			-29.6
				32.5									0.68		4.69			-29.9
				37.5									0.7		4.41			-29.8
				45									0.57		4.47			-30.3
				55									0.63		4.49			-30.7
				65									0.58		4.54			-31.7
				75									0.69		4.57
				85									0.57		4.25			-31.9
				95									0.43		4.15
				105									0.51		4.5			-32.5
				115									0.63		4.32
				125									0.77		4.6
				135									0.53		4.78
				145									0.57		4.78			-31.6
				155									0.53		4.84
				165									0.64		4.62
				175									0.59		4.62			-31.8
