# Supplementary material for: Quantifying key drivers of marine pyrite burial flux and isotopic composition
Source: Research Square preprint supplement (doi:10.21203/rs.3.rs-4788953/v1), 2024-11-01
Supplement: Supplementary file 232 [file DH7-1.xlsx]

## Sheet: Sheet1
reference	latitude_dd	longitude_dd	water_depth_m	depth_cm	age_yr	porosity_vol_	SO4_mM	H2S_mM	CH4_mM	S_py_wt_	S_AVS_wt_	S0_wt_	TOC_wt_	Fe_HR_wt_	Fe_tot_wt_	d34S_SO4	d34S_H2S	d34S_py	lnSRR_molL_1d_1	lnMOR_molL_1d_1	sed_rate_cmky
Zhu2016	27.6333	121.283	20	1.5									0.65		3.96			-30.1
				5.5									0.69		3.96			-30.4
				10.5									0.57		3.98			-31.4
				15.5									0.58		4.11			-32
				20.5									0.62		4.13			-31.7
				25.5									0.66		4.08			-32
				30.5									0.72		4.21			-32.9
				32.5									0.61		4.18
				37.5									0.63		4.24			-32.5
				45.5									0.73		4.36			-32.5
				53									0.58		4.41			-32.4
				63									0.63		4.33			-33.1
				73									0.59		4.08
				83									0.57		4.09			-33.1
				93									0.61		3.97
				103									0.7		4.08			-32.9
				113									0.65		4.32
				123									0.58		4.09
				133									0.71		4.22			-32.5
				143									0.71		4.37
				153									0.66		4.26
				163									0.56		4.4			-32
