# Supplementary material for: Quantifying key drivers of marine pyrite burial flux and isotopic composition
Source: Research Square preprint supplement (doi:10.21203/rs.3.rs-4788953/v1), 2024-11-01
Supplement: Supplementary file 238 [file DHCL11_2017.xlsx]

## Sheet: Sheet1
reference	latitude_dd	longitude_dd	water_depth_m	depth_cm	age_yr	porosity_vol_	SO4_mM	H2S_mM	CH4_mM	S_py_wt_	S_AVS_wt_	S0_wt_	TOC_wt_	Fe_HR_wt_	Fe_tot_wt_	d34S_SO4	d34S_H2S	d34S_py	lnSRR_molL_1d_1	lnMOR_molL_1d_1	sed_rate_cmky
Lin2017	21.9333	118.9	1875	10					0.0006
				18.5									0.93
				44									0.71
				54												22
				65.5						0.03			0.7					-17.1
				80					0.0006
				81.5			29.6						0.68
				98.5						0.04			0.77					-22.4
				112												21.9
				125.5									0.6
				145.5									1.26
				150					0.0012	0.06								-31.6
				155.5												22.3
				165.5			27.3						0.56
				185.5									0.57
				195.5												23.4
				205.5			25.6			0.06			0.67					-32.3
				220					0.0008
				225.5									1
				245.5			25.6						0.62
				265.5						0.09			0.59					-37.1
				275.5												24.4
				285.5			26						0.53
				290					0.0008
				305.5						0.09			0.66					-34.9
				315.5												25.2
				325.5			22						0.64
				345.5						0.11			0.59					-41.7
				355.5												24.9
				360					0.0008
				365.5			22.3						0.54
				385.5									0.63
				405.5			20.2			0.17			0.71					-42.6
				415.5												26.6
				425.5									0.68
				430					0.0017
				445.5			19.4			0.15			0.72					-42.2
				455.5												29
				465.5									0.72
				485.5			18.1						0.68
				495.5												28.1
				500					0.0014
				505.5						0.22			0.76					-43.6
				525.5			14.3			0.26			0.65					-43.7
				535.5												29.5
				545.5									0.7
				565.5									0.76
				570					0.0021	0.2								-42.8
				575.5												31.5
				585.5									0.71
				605.5			10.5						0.66					-44
				625.5						0.26			0.74					-43.8
				640					0.002
				645.5			9.2						0.7
				665.5						0.36			0.77					-44.1
				685.5			6.8						0.89
				705.5						0.33			0.72					-40.2
				710					0.2174
				725.5						0.49			0.88					-26.3
				725.5												42.3
				745.5						0.66			0.6					-20.6
				765.5			3.3			1.2			0.55					-2.9
				772					0.1697
