# Supplementary material for: Quantifying key drivers of marine pyrite burial flux and isotopic composition
Source: Research Square preprint supplement (doi:10.21203/rs.3.rs-4788953/v1), 2024-11-01
Supplement: Supplementary file 241 [file FOAM-1.xlsx]

## Sheet: Sheet1
reference	latitude_dd	longitude_dd	water_depth_m	depth_cm	age_yr	porosity_vol_	SO4_mM	H2S_mM	CH4_mM	S_py_wt_	S_AVS_wt_	S0_wt_	TOC_wt_	Fe_HR_wt_	Fe_tot_wt_	d34S_SO4	d34S_H2S	d34S_py	lnSRR_molL_1d_1	sed_rate_cmky
Hardisty2018	41.2408	-72.7458	10	0												20.5
				0.5												23.4		-20.1
				1.5												25.1
				2.5												24.7		-23
				3.5												26.2		-23.2
				4.5												25.8		-23.4
				5.5												26.8		-22.9
				6.5												28.2
				7.5												28.6		-23.1
				10.5												30.9
				11.5												30.9
				12.5												32		-23.2
				13.5												33.3		-22.1
				14.5														-21.8
				14.5														-21.7
				15.5												33.8		-21.6
				16.5												33.5		-21.1
				17.5												34.3
				18.5												34.6		-19.1
