# Supplementary material for: Quantifying key drivers of marine pyrite burial flux and isotopic composition
Source: Research Square preprint supplement (doi:10.21203/rs.3.rs-4788953/v1), 2024-11-01
Supplement: Supplementary file 253 [file GC-185_2646-3.xlsx]

## Sheet: Sheet1
reference	latitude_dd	longitude_dd	water_depth_m	depth_cm	age_yr	porosity_vol_	SO4_mM	H2S_mM	CH4_mM	S_py_wt_	S_AVS_wt_	S0_wt_	TOC_wt_	Fe_HR_wt_	Fe_tot_wt_	d34S_SO4	d34S_H2S	d34S_py	lnSRR_molL_1d_1	sed_rate_cmky
Aharon2003	27.7667	-91.5	590	0.5									0.73
				3			30.13	0.01					0.72			21.3
				6			27.52	0.186					0.71			23.4
				9			25.77	0.78					0.66			26.5
				12			24.41	2.25								28.1
				15			23.12	2.35					0.56			28.4
				18			23.33	2.55								29.8
