# Supplementary material for: Quantifying key drivers of marine pyrite burial flux and isotopic composition
Source: Research Square preprint supplement (doi:10.21203/rs.3.rs-4788953/v1), 2024-11-01
Supplement: Supplementary file 259 [file GC-185_2647-2.xlsx]

## Sheet: Sheet1
reference	latitude_dd	longitude_dd	water_depth_m	depth_cm	age_yr	porosity_vol_	SO4_mM	H2S_mM	CH4_mM	S_py_wt_	S_AVS_wt_	S0_wt_	TOC_wt_	Fe_HR_wt_	Fe_tot_wt_	d34S_SO4	d34S_H2S	d34S_py	lnSRR_molL_1d_1	sed_rate_cmky
Aharon2003	27.7667	-91.5	590	0.5									0.73
				2			14.3	7.66					0.74			36.8
				4			5.24	17.32					0.72			41.5	12.9
				6			2.6	19.29					0.71			49.4	19
				9			0.4	19.69					0.66
				12			0.5	19.69
				15			0.3	19.89					0.56
				18			0.4	19.89
				21			1	20.28					0.56
