# Supplementary material for: Quantifying key drivers of marine pyrite burial flux and isotopic composition
Source: Research Square preprint supplement (doi:10.21203/rs.3.rs-4788953/v1), 2024-11-01
Supplement: Supplementary file 262 [file GC-185_2647-3.xlsx]

## Sheet: Sheet1
reference	latitude_dd	longitude_dd	water_depth_m	depth_cm	age_yr	porosity_vol_	SO4_mM	H2S_mM	CH4_mM	S_py_wt_	S_AVS_wt_	S0_wt_	TOC_wt_	Fe_HR_wt_	Fe_tot_wt_	d34S_SO4	d34S_H2S	d34S_py	lnSRR_molL_1d_1	sed_rate_cmky
Aharon2003	27.7667	-91.5	590	0.5									0.73
				1				1.16									35.4
				1.5									0.76
				2.5									0.74
				3			19.53	5.49								30.7
				3.5									0.72
				5			16.39	6.48					0.71			35.6	35
				7			14.98	7.47					0.62			36.6	23.3
				10				7.86					0.66
				13			16.42	7.47								26.9
				16				6.68					0.56
				20				5.49									-3.4
				23			16.37	4.31					0.56			31.6
