# Supplementary material for: Quantifying key drivers of marine pyrite burial flux and isotopic composition
Source: Research Square preprint supplement (doi:10.21203/rs.3.rs-4788953/v1), 2024-11-01
Supplement: Supplementary file 265 [file GC-185_2647-4.xlsx]

## Sheet: Sheet1
reference	latitude_dd	longitude_dd	water_depth_m	depth_cm	age_yr	porosity_vol_	SO4_mM	H2S_mM	CH4_mM	S_py_wt_	S_AVS_wt_	S0_wt_	TOC_wt_	Fe_HR_wt_	Fe_tot_wt_	d34S_SO4	d34S_H2S	d34S_py	lnSRR_molL_1d_1	sed_rate_cmky
Aharon2003	27.7667	-91.5	590	0.5									0.73
				2				0					0.74
				4				0					0.72
				6			30.55	0.13					0.71			20.7
				9			26.69						0.66			21.1
				11			26.65	0.75								21.3
				13				0.76
				16			26.27	0.74					0.56			23.2
				19				0.75
				22			25.31	1.03					0.56			23.4
