# Supplementary material for: Quantifying key drivers of marine pyrite burial flux and isotopic composition
Source: Research Square preprint supplement (doi:10.21203/rs.3.rs-4788953/v1), 2024-11-01
Supplement: Supplementary file 277 [file GC-232_2639-2.xlsx]

## Sheet: Sheet1
reference	latitude_dd	longitude_dd	water_depth_m	depth_cm	age_yr	porosity_vol_	SO4_mM	H2S_mM	CH4_mM	S_py_wt_	S_AVS_wt_	S0_wt_	TOC_wt_	Fe_HR_wt_	Fe_tot_wt_	d34S_SO4	d34S_H2S	d34S_py	lnSRR_molL_1d_1	sed_rate_cmky
Aharon2003	27.7333	-91.3	630	0.5				0.17					0.73
				1.5									0.76
				2.5			18.9	4.9					0.74
				3.5									0.72
				5			17.21	8.65					0.71
				7									0.62
				8			14.77	10.03
				9									0.66
				11			14.37	10.62
				14.5			10.55	13.18					0.56
				16
				18			8.5	15.16
				21			7.62	16.34
