# Supplementary material for: Quantifying key drivers of marine pyrite burial flux and isotopic composition
Source: Research Square preprint supplement (doi:10.21203/rs.3.rs-4788953/v1), 2024-11-01
Supplement: Supplementary file 283 [file GC-232_2639-4.xlsx]

## Sheet: Sheet1
reference	latitude_dd	longitude_dd	water_depth_m	depth_cm	age_yr	porosity_vol_	SO4_mM	H2S_mM	CH4_mM	S_py_wt_	S_AVS_wt_	S0_wt_	TOC_wt_	Fe_HR_wt_	Fe_tot_wt_	d34S_SO4	d34S_H2S	d34S_py	lnSRR_molL_1d_1	sed_rate_cmky
Aharon2003	27.7333	-91.3	630	0.5									0.73
				1.5									0.76
				2.5									0.74
				3			15.45	7.86					0.72			32.2	10
				5			16.82	9.83					0.71			35.2	8.6
				8			12.17	11.01					0.62			40.2	2.3
				10			8.01	13.58					0.66			44.3	8.5
				13			4.99	13.97								50.9	20.4
				15			1.92	18.7					0.56				12.1
				18			1.74	19.3									15.7
				21			1.2	19.3									15.7
				25			0.98	18.31									13.5
