# Supplementary material for: Quantifying key drivers of marine pyrite burial flux and isotopic composition
Source: Research Square preprint supplement (doi:10.21203/rs.3.rs-4788953/v1), 2024-11-01
Supplement: Supplementary file 289 [file GC-232_2643-3.xlsx]

## Sheet: Sheet1
reference	latitude_dd	longitude_dd	water_depth_m	depth_cm	age_yr	porosity_vol_	SO4_mM	H2S_mM	CH4_mM	S_py_wt_	S_AVS_wt_	S0_wt_	TOC_wt_	Fe_HR_wt_	Fe_tot_wt_	d34S_SO4	d34S_H2S	d34S_py	lnSRR_molL_1d_1	sed_rate_cmky
Aharon2003	27.7333	-91.3	630	0.5									0.73
				1.5									0.76
				2			30.33	0								21.1
				2.5									0.74
				3.5									0.72
				5			30.1	0					0.71			21.5
				7			28.45	0					0.62			20.9
				9			28.23	0.01					0.66			20.9
				12			26.68	0.4								21.9
				15			26.25	0.64					0.56			22
				18			26.62	0.55								21.9
				21			27.47	0.44								23
				24			27.86	0.34					0.56			21.9
