# Supplementary material for: Quantifying key drivers of marine pyrite burial flux and isotopic composition
Source: Research Square preprint supplement (doi:10.21203/rs.3.rs-4788953/v1), 2024-11-01
Supplement: Supplementary file 301 [file H2017_D-8.xlsx]

## Sheet: Sheet1
reference	latitude_dd	longitude_dd	water_depth_m	depth_cm	age_yr	porosity_vol_	SO4_mM	H2S_mM	CH4_mM	S_py_wt_	S_AVS_wt_	S0_wt_	TOC_wt_	Fe_HR_wt_	Fe_tot_wt_	d34S_SO4	d34S_H2S	d34S_py	lnSRR_molL_1d_1	sed_rate_cmky
Hu2017	22.0345	118.486	814	8.54918									0.488645
				17.7179									0.455161
				28.5946									0.48011
				38.1438									0.570525
				48.5604									0.487502
				56.6848									0.46285
				65.6587									0.468301
				77.3851									0.523352
				87.5361									0.493422
				97.6783									0.465262
				107.847									0.431793
				116.839									0.433704
				124.875									0.42675
				139.884									0.425215
				147.796									0.443038
				157.646									0.473281
				168.7									0.462835
				175.586									0.485951
				187.418									0.519765
				194.472									0.509256
				207.534									0.497071
				214.393									0.525497
				227.394									0.525701
				235.332									0.538215
				246.209									0.563164
				256.307									0.543853
				266.352									0.535161
				278.22									0.561895
				288.309									0.544354
				295.212									0.563931
				306.239									0.558794
				316.24									0.558951
				325.09									0.589178
				338.17									0.573453
				342.047									0.598293
				354.056									0.596711
				368.066									0.595161
				373.155									0.577541
				386.235									0.561817
				400.112									0.586813
				19.0848			28.0282
				28.125			26.4789
				37.1652			27.1127
				45.2009			27.7465
				58.2589			28.169
				69.308			26.6901
				78.3482			25.9859
				88.3929			27.8169
				99.442			26.6901
				117.522			25.8451
				140.625			25.5634
				157.701			26.1268
				180.804			25.9859
				200.893			25.3521
				220.982			26.4085
				240.067			25.2817
				260.156			25.9155
				281.25			25.7042
				301.339			25.2817
				321.429			26.0563
				341.518			24.6479
				364.621			24.7887
				381.696			23.7324
				401.786			23.0282
				20														-18.1
				60														-26.4
				107.5														-31
				167.5														-33.4
				247.5														-42
				297.5														-41.5
				367.5														-40.1
				397.5														-39.5
