# Supplementary material for: Quantifying key drivers of marine pyrite burial flux and isotopic composition
Source: Research Square preprint supplement (doi:10.21203/rs.3.rs-4788953/v1), 2024-11-01
Supplement: Supplementary file 304 [file H2017_D-F.xlsx]

## Sheet: Sheet1
reference	latitude_dd	longitude_dd	water_depth_m	depth_cm	age_yr	porosity_vol_	SO4_mM	H2S_mM	CH4_mM	S_py_wt_	S_AVS_wt_	S0_wt_	TOC_wt_	Fe_HR_wt_	Fe_tot_wt_	d34S_SO4	d34S_H2S	d34S_py	lnSRR_molL_1d_1	sed_rate_cmky
Hu2017	22.0763	118.937	1485	7.52158									0.617046
				20.0607									0.54935
				26.3636									0.585937
				36.294									0.575605
				49.1664									0.61226
				56.1072									0.561462
				65.9614									0.561564
				77.12									0.532984
				87.9263									0.552661
				99.2373									0.503213
				108.93									0.525488
				115.242									0.56077
				137.102									0.566214
				144.843									0.55586
				157.344									0.49338
				165.989									0.509122
				173.729									0.498768
				182.47									0.501467
				192.257									0.510699
				207.51									0.521291
				219.411									0.54098
				227.428									0.492802
				238.139									0.525522
				247.079									0.500832
				257.924									0.515292
				270.215									0.481506
				277.527									0.529843
				287.601									0.499947
				298.397									0.520929
				308.128									0.537986
				318.22									0.505482
				327.122									0.486009
				338.919									0.520044
				349.344									0.441891
				356.599									0.498053
				362.102									0.494197
				376.346									0.49304
				387.2									0.506196
				398.082									0.515439
				407.06									0.485532
				419.019									0.497395
				432.224									0.488402
				11.0107			28.4185
				15.3437			26.1512
				21.9909			26.0814
				36.3663			25.3235
				47.4957			26.3518
				60.7079			24.3578
				65.1931			25.5246
				74.0358			24.9737
				87.2784			23.6665
				93.9713			24.6269
				107.235			23.8004
				116.154			24.9665
				127.216			24.4838
				134.935			23.5897
				147.128			23.5876
				154.859			22.9681
				165.912			22.2794
				175.848			21.3849
				184.754			22.2762
				198.119			23.7163
				208.012			21.8602
				214.644			21.447
				224.592			20.8271
				234.497			19.2458
				241.148			19.2447
				256.601			17.7997
				266.655			19.5837
				276.552			17.7963
				289.898			18.8243
				299.806			17.3116
				305.327			16.8299
				317.507			16.5531
				327.406			14.8344
				337.39			15.0387
				342.911			14.557
				358.379			13.4555
				368.379			14.0032
				376.113			13.4525
				384.953			12.8328
				397.09			11.5945
				403.722			11.1813
				415.942			11.7973
				428.11			11.2458
				435.81			9.93955
				2.5														-14.6
				47														-14.7
				97														-17.2
				197														-22.6
				307														-20.9
				427														-21.1
