# Supplementary material for: Quantifying key drivers of marine pyrite burial flux and isotopic composition
Source: Research Square preprint supplement (doi:10.21203/rs.3.rs-4788953/v1), 2024-11-01
Supplement: Supplementary file 307 [file H2017_D7.xlsx]

## Sheet: Sheet1
reference	latitude_dd	longitude_dd	water_depth_m	depth_cm	age_yr	porosity_vol_	SO4_mM	H2S_mM	CH4_mM	S_py_wt_	S_AVS_wt_	S0_wt_	TOC_wt_	Fe_HR_wt_	Fe_tot_wt_	d34S_SO4	d34S_H2S	d34S_py	lnSRR_molL_1d_1	sed_rate_cmky
Hu2017	22.0488	118.454	766	2.67857									0.454144							13
				8.92857									0.465193							13
				18.75									0.434254							13
				29.4643									0.469613							13
				35.7143									0.436464							13
				39.2857									0.394475							13
				47.3214									0.511602							13
				58.0357									0.513812							13
				66.9643									0.493923							13
				67.8571									0.447514							13
				81.25									0.451934							13
				87.5									0.396685							13
				92.8571									0.376796							13
				99.1071									0.361326							13
				115.179									0.341436							49
				124.107									0.334807							49
				133.036									0.323757							49
				139.286									0.312707							49
				148.214									0.337017							49
				154.464									0.281768							49
				161.607									0.295028							49
				175.893									0.288398							49
				184.821									0.295028							43
				190.179									0.332597							43
				196.429									0.312707							43
				207.143									0.299447							43
				217.857									0.341436							43
				224.107									0.330387							43
				234.821									0.321547							43
				247.321									0.379006							43
				257.143									0.432044							43
				265.179									0.447514							51
				276.786									0.498343							51
				286.607									0.524862							51
				293.75									0.551381							51
				306.25									0.558011							51
				317.857									0.560221							51
				331.25									0.577901							51
				8.01506			28.2077
				11.5702			27.2427
				17.8522			27.2414
				23.2096			26.4827
				33.0838			26.5495
				39.4201			28.0633
				46.4859			24.8938
				50.1646			27.3723
				69.8462			25.6464
				90.4772			25.3665
				111.086			24.4669
				129.947			24.8761
				149.693			24.9408
				169.441			25.0744
				189.138			23.7617
				210.577			21.0023
				229.455			21.8936
				250.959			20.9249
				270.695			20.7141
				291.363			21.4673
				309.188			18.02
				330.704			17.3956
				345.038			16.7039
				1														-21.9
				31														-23.4
				33														-26.9
				35														-25.8
				38														-25.2
				67														-25.8
				79														-23.1
				102.5														-29.3
				137.5														-31.8
				147.5														-28.7
				152.5
				157.5														-32.5
				167.5														-31.2
				177.5														-30.9
				187.5														-34
				192.5														-35.3
				197.5														-33.3
				202.5														-34.4
				227.5														-30.9
				247.5														-33.7
				287.5														-38.1
				297.5														-37.4
				327.5														-37.7
