# Supplementary material for: Quantifying key drivers of marine pyrite burial flux and isotopic composition
Source: Research Square preprint supplement (doi:10.21203/rs.3.rs-4788953/v1), 2024-11-01
Supplement: Supplementary file 310 [file HD109.xlsx]

## Sheet: Sheet1
reference	latitude_dd	longitude_dd	water_depth_m	depth_cm	age_yr	porosity_vol_	SO4_mM	H2S_mM	CH4_mM	S_py_wt_	S_AVS_wt_	S0_wt_	TOC_wt_	Fe_HR_wt_	Fe_tot_wt_	d34S_SO4	d34S_H2S	d34S_py	lnSRR_molL_1d_1	lnMOR_molL_1d_1	sed_rate_cmky
Lin2017	21.3492	119.086	3218	10			28.11		0.0004				0.82
				30			20.82						0.77					-11.5
				50			28.63						0.88
				70			20.82			0.01			0.84					-17.5
				90			28.63						0.98
				110			27.04		0.0008				0.85
				130			26.57						0.82
				150			26.33						0.88
				170			32.06			0.89			0.77					-28.3
				190			23.93			0.47			0.72					-43.7
				210			26.09		0.0021	0.75			1.09					-36.3
				230			28.48						1.44
				250			26.33						1.42
				270			26.81						1.28
				290			26.33						1.37
				310			26.33		0.0011				1.3
				330			26.33			1.09			1.4					-35.1
				350			24.41						1.29					-35.6
				370			20.34			0.34			1.31					-37.9
				390			23.45						1.26
				410			16.75		0.0002	0.62			1.14					-35.7
				430			19.14						1.37
				450			16.75			0.38			1.26					-21
				470			11.96						1.36
				490			11.72						1.28
				510			8.14		0.0008	0.46			1.29					-16
				530			7.18						1.24
				550			7.18						1.43					-4
				570			7.18			0.43			1.32					-1.6
				590			4.79						1.46					-16
				610			7.18		0.08				1.09
				630			3.59						1.15
				650			3.59			0.28			1.16					-19.2
				670			1.89			0.4			1.31					-20
				690			9.82		0.0024				1.46					-43.8
				710			2.05						1.4
				730			3.16			0.31			1.36					-34.7
				750			5.42		0.2394									-30.6
				765														-29.5
