# Supplementary material for: Quantifying key drivers of marine pyrite burial flux and isotopic composition
Source: Research Square preprint supplement (doi:10.21203/rs.3.rs-4788953/v1), 2024-11-01
Supplement: Supplementary file 313 [file HS148.xlsx]

## Sheet: Sheet1
reference	latitude_dd	longitude_dd	water_depth_m	depth_cm	age_yr	porosity_vol_	SO4_mM	H2S_mM	CH4_mM	S_py_wt_	S_AVS_wt_	S0_wt_	TOC_wt_	Fe_HR_wt_	Fe_tot_wt_	d34S_SO4	d34S_H2S	d34S_py	lnSRR_molL_1d_1	sed_rate_cmky
Lin2016	19.7926	114.993	822	10			32.2		20.1
				42.5									1.13
				72.5														37.6
				104
				123			21.8		14.4
				140.5									1.32
				155.5
				170.5									1.35					-35.2
				293			18.6		6.3				1.35					-29.4
				225.5									1.35
				263			22.4		13.1
				280.5
				295.5									1.54					-32
				310.5
				333			18.7		14.6									-24.5
				350.5
				365.5									1.43					-22.2
				403			15.9		24.8
				420.5									1.49					-14.2
				435.5									1.41					-11.3
				450.5									1.38					-18.9
				473			13.4		13.8				1.41					-15.2
				490.5									1.36					30.4
				505.5														36.4
				520.5									1.2					25.2
				543			10.2		7.5
				560.5									1.25					38.7
				575.5									1.19					38.6
				590.5									1.18					52.7
				613			7.4		7.5
				630.5									1.21					35.6
				645.5									1.28
				660.5
				690.5									1.33					44.9
				709			4.5		106.8				1.22
