# Supplementary material for: Quantifying key drivers of marine pyrite burial flux and isotopic composition
Source: Research Square preprint supplement (doi:10.21203/rs.3.rs-4788953/v1), 2024-11-01
Supplement: Supplementary file 316 [file HS217.xlsx]

## Sheet: Sheet1
reference	latitude_dd	longitude_dd	water_depth_m	depth_cm	age_yr	porosity_vol_	SO4_mM	H2S_mM	CH4_mM	S_py_wt_	S_AVS_wt_	S0_wt_	TOC_wt_	Fe_HR_wt_	Fe_tot_wt_	d34S_SO4	d34S_H2S	d34S_py	lnSRR_molL_1d_1	sed_rate_cmky
Lin2016	19.9498	115.295	1182	12.5			22.9		15.8
				62.5									0.95
				85			21.7		16.4
				122.5									0.74
				160			20.9		13.3
				182.5
				212.5									1.05
				235			21.2		20.3
				280									0.89					-30.5
				310			23.3		14.8
				332.5									0.96
				362.5
				385			20.9		16.9
				407.5
				422.5									1.27					-42
				460			16.7		17.4
				497.5									1.3					-26.2
				535			18.6		13.8
				557.5									1.39
				589
				610			14.5		16.9
				632.5									1.32					-31.1
				647.5									1.27					-32.3
				662.5									1.28					-27.7
				685			10.6		36
				707.5									1.39					27.9
				722.5									1.25					27.7
				737.5									1.25					29.5
				760			7.5		63.2
				782.5									1.3					15.5
				797.5									1.27					26.1
				827.5									1.35					24.8
				842.5														18.9
				857.5
				872.5			5.5		210.5
