# Supplementary material for: Quantifying key drivers of marine pyrite burial flux and isotopic composition
Source: Research Square preprint supplement (doi:10.21203/rs.3.rs-4788953/v1), 2024-11-01
Supplement: Supplementary file 319 [file HS373.xlsx]

## Sheet: Sheet1
reference	latitude_dd	longitude_dd	water_depth_m	depth_cm	age_yr	porosity_vol_	SO4_mM	H2S_mM	CH4_mM	S_py_wt_	S_AVS_wt_	S0_wt_	TOC_wt_	Fe_HR_wt_	Fe_tot_wt_	d34S_SO4	d34S_H2S	d34S_py	lnSRR_molL_1d_1	lnMOR_molL_1d_1	sed_rate_cmky
Lin 2016b	19.88	115.2	1415	5						0.00103776
				5.1008
				8.55466					10.1056
				9.65266						0.00166616
				13.1683									0.850416
				14.496			28.3172
				21.7831						0.00670234
				35.2132						0.00156382
				36.5738									0.8119
				61.7071									0.851234
				75.5833						0.00394456
				76.0891									0.851476
				78.8513
				79.6266					8.62697
				84.0612			25.9542
				92.3386									0.773929
				93.0493						0.00121012
				106.514						0.00127834
				108.518									0.774201
				123.991						0.001334
				131.819									0.852415
				144.305									0.961575
				147.23
				148.212						0.00016
				150.616					8.79324
				155.261			23.843
				163.027						0.00359445
				165.801									1.04754
				173.006									1.0321
				189.172									1.04793
				193.952						0.000343
				216.033									1.16512
				217.439
				218.224						0.0122718
				220					10.8392
				223.292			23.0768
				227.596						0.00206474
				234.038									1.13429
				245.119						0.0096217
				255.555									1.19691
				259.877						0.000664
				275.288									1.24394
				284.116									1.42307
				289.417
				289.47					11.1619
				289.485						0.00308814
				294.491			20.9656
				300.275									1.44669
				301.627						0.0106666
				314.587									1.52475
				316.373						0.000833
				328.51						0.00547426
				330.675									1.62619
				341.413									1.68085
				354.354									1.28418
				356.744						0.00154766
				359.553
				360.593					8.66501
				365.691			18.8545
				370.316									1.52569
				371.622						0.0192847
				385.029						0.00906153
				388.371									1.44039
				402.478						9.34e-05
				402.878									1.30056
				411.678									1.51083
				425.348						1.8e-06
				425.927									1.65892
				427.91
				430.143					7.42116
				433.626			16.3236
				437.592						0.0304612
				440.26									1.71364
				452.781									1.78389
				456.415						0.0278435
				462.5														-37.6
				470.752									1.79198
				472.547						0.0252365
				479.706									1.83104
				494.241									1.66008
				495.348						0.00989102
				503.498
				505.632					8.21467
				508.036			13.6237
				510.155									1.95606
				511.424						0.00542758
				526.517									1.754
				527.613						0.00467709
				540.773									1.89432
				553.293						0.0312692
				553.42									1.8245
				557.465
				558.542					7.43854
				559.759			11.0111
				567.9									1.71579
				569.322						0.00578128
				583.939									1.8717
				585.449						0.00190315
				596.542						0.0755876
				600.035									1.96536
				614.361									2.02786
				618														-18.5
				622.005						0.0538754
				624.938									2.2615
				629.464					8.9364
				629.464
				630.927			8.31173
				637.277						0.159323
				639.613									1.9349
				645.5														16
				653.82									2.12969
				654.184						0.0295941
				668														24
				669.056						0.0460599
				670.091									2.0288
				684.375									2.13799
				693.559									1.92024
				693.625						0.124775
				697.82
				700.51			6.28482
				700.528					7.61442
				708														37.1
				709.389									2.30961
				712.402						0.111988
				723.946						0.286094
				727.688									1.95195
				730.5														37.9
				739.291						0.108067
				740.293									1.92881
				754.598									2.01466
				763.215						0.0431406
				765.014									2.42728
				765.5														29.2
				769.783
				770.058					6.76222
				771.696			3.92154
				777.955									2.03061
				781.947						0.0201842
				794.323									1.82077
				795.474						0.0366555
				807.519						0.0226242
				810.58									1.73544
				815.882									1.8367
				828														18.1
				830.947						0.147107
				835.706									1.78256
				838.219
				839.339					10.8447
				841.348			3.15512
				848.284									1.79055
				849.075						0.010593
				861.541						0.0694418
				864.708									1.51846
				878.614									2.04787
				880.056						0.00181877
				893.038									2.00142
				907.7									1.69039
				908.399						0.318407
				915.608
				917.837					11.8736
				918														31.2
				919.121			2.72366
