# Supplementary material for: Quantifying key drivers of marine pyrite burial flux and isotopic composition
Source: Research Square preprint supplement (doi:10.21203/rs.3.rs-4788953/v1), 2024-11-01
Supplement: Supplementary file 322 [file HU.xlsx]

## Sheet: Sheet1
reference	latitude_dd	longitude_dd	water_depth_m	depth_cm	age_yr	porosity_vol_	SO4_mM	H2S_mM	CH4_mM	S_py_wt_	S_AVS_wt_	S0_wt_	TOC_wt_	Fe_HR_wt_	Fe_tot_wt_	d34S_SO4	d34S_H2S	d34S_py	lnSRR_molL_1d_1	sed_rate_cmky
Antler2013	32.8978	34.9132	66	0.423347			31.7995
				30.5981			30.6327
				60.6918			27.1586
				90.8395			25.2227
				120.285			23.2901
				151.162			22.12
				181.346			21.2095
				210.043			17.9984
				235.318			17.3673
				0.423347												19.2233
				30.5134												21.2253
				59.2745												22.4548
				90.1247												22.9
				119.587												24.1278
				150.46												25.8717
				180.623												27.0979
				210.767												27.2851
				233.939												29.567
