# Supplementary material for: Quantifying key drivers of marine pyrite burial flux and isotopic composition
Source: Research Square preprint supplement (doi:10.21203/rs.3.rs-4788953/v1), 2024-11-01
Supplement: Supplementary file 325 [file K11.xlsx]

## Sheet: Sheet1
reference	latitude_dd	longitude_dd	water_depth_m	depth_cm	age_yr	porosity_vol_	SO4_mM	H2S_mM	CH4_mM	S_py_wt_	S_AVS_wt_	S0_wt_	TOC_wt_	Fe_HR_wt_	Fe_tot_wt_	d34S_SO4	d34S_H2S	d34S_py	lnSRR_molL_1d_1	lnMOR_molL_1d_1	sed_rate_cmky
Middelburg1990	1.05827	127.93	260	3.46122						0.981546	0.342671		4.01918
				6.62161			22.2367
				39.7964			12.8883
				75.3494						1.01095	0.381336		3.24667
				78.0843			7.79725
				103.289			1.95629
				146.677			1.229
				176.874			0.602807
				177.512						1.05956	0.429946		2.02332
				194	2530
				216.404			0.61865
				242.757			0.629212
				274.757			0.642038
				275.916						1.19138	0.450693		2.61429
				297	4210
				312.417			0.550749
				338.77			0.561312
				367.005			0.572628
				381	5520
				415.933			0.698622
				447.933			0.711448
				448.057						0.556444	0.556444		3.56744
				466.77			0.612614
				487	6260
				502.535			0.626949
				511	6410
				530.757			0.744643
				562.757			0.757469
				609	7610
				615.463			0.778594
				643.698			0.78991
				673.816			0.801982
