# Supplementary material for: Quantifying key drivers of marine pyrite burial flux and isotopic composition
Source: Research Square preprint supplement (doi:10.21203/rs.3.rs-4788953/v1), 2024-11-01
Supplement: Supplementary file 328 [file K3.xlsx]

## Sheet: Sheet1
reference	latitude_dd	longitude_dd	water_depth_m	depth_cm	age_yr	porosity_vol_	SO4_mM	H2S_mM	CH4_mM	S_py_wt_	S_AVS_wt_	S0_wt_	TOC_wt_	Fe_HR_wt_	Fe_tot_wt_	d34S_SO4	d34S_H2S	d34S_py	lnSRR_molL_1d_1	lnMOR_molL_1d_1	sed_rate_cmky
Middelburg1990	0.955289	127.848	457	5.66802			22.0023
				8.26446									3.91525
				18.9179			16.5532
				27	780
				39.8601			3.10718
				45.4545									3.03082
				45.7583						1.55202	0.439898
				78.7633			0.941245
				100.975			1.22304
				139.418			1.32964
				152	650
				169.594						1.32009	0.441645
				169.856			0.978432
				173.554									3.91525
				204.306			0.810677
				235.907			0.714486
				271.461			1.09264
				305.484			1.0338
				337.887			0.9743
				371.901									2.49153
				373.485			1.13429
				376.975						1.72483	0.472607
				407.538			0.930006
				436.717			0.796463
				499.875			0.822246
				543	1180
				553.272			1.06223
				574.38									2.98767
				575.285						1.55953	0.363255
				577.578			0.999422
				603.489			1.01
				622.922			1.01793
				651	2340
				661.789			1.0338
				687.7			1.04438
				708.767			0.98025
				729.339									4.00154
				729.79			1.13429
				733.103						1.18798	0.41221
				763.798			1.14817
				781	1820
				801.045			1.16337
				830.195			1.17527
				859.345			1.18717
				877	1940
				888.495			1.19907
				912.852						1.43346	0.293251
				913.223									2.40524
				914.465			0.918767
