# Supplementary material for: Quantifying key drivers of marine pyrite burial flux and isotopic composition
Source: Research Square preprint supplement (doi:10.21203/rs.3.rs-4788953/v1), 2024-11-01
Supplement: Supplementary file 331 [file K4.xlsx]

## Sheet: Sheet1
reference	latitude_dd	longitude_dd	water_depth_m	depth_cm	age_yr	porosity_vol_	SO4_mM	H2S_mM	CH4_mM	S_py_wt_	S_AVS_wt_	S0_wt_	TOC_wt_	Fe_HR_wt_	Fe_tot_wt_	d34S_SO4	d34S_H2S	d34S_py	lnSRR_molL_1d_1	lnMOR_molL_1d_1	sed_rate_cmky
Middelburg1990	0.957692	127.749	414	4.84603												-17.2147
				6.9411			26.7517
				10.867						1.3275	0.516628		4.66732
				35.2508			23.7894
				36	780
				43.6647			22.1205
				62.1386			18.7833
				63.9596						1.58743	0.444426		3.47142
				75	1480
				79.566												-22.3022
				83.8538			15.9116
				110.64			11.8343
				153.846			8.13424
				170.601												-23.1766
				188.744						1.48099	0.46719		5.16407
				188.791			4.70992
				203	2710
				207.051			3.32311
				231.606												-20.4909
				232.007			0.916968
				255.062			0.832143
				273.22			0.374091
				276.644						1.61291	0.525547		4.81285
				303	3790
				312.737			0.295017
				328.281												-22.1399
				344.794						1.91021	1.13604		3.58544
				347.305			0.307094
				386.801			0.413771
				391.171												-19.7642
				417	5960
				421.379			0.332972
				434.435						1.65547	0.789212		5.37321
				447.716			0.342174
				474.054			0.351375
				505	7600
				516.852			0.366327
				556.348			0.473005
				565.18												-14.6701
				587.634			0.391056
				604.072												-13.7109
				606	9900
				611.308												-11.6828
				612.325			0.399682
				628	9920
				641.049												-12.1303
				641.975			0.224282
				659	9670
				681.984												-13.1931
				697.942			0.243835
				701.476												-3.21931
				707.77						2.88112	0.853515		1.43346
				717.574												3.32816
				717.685			0.343611
				734.156			0.256486
				746	9940
				748.059												14.8656
				751	10400
				756	9890
				758.32						4.32315	4.32315		4.32315
				758.837			0.357988
				761	10030
