# Supplementary material for: Quantifying key drivers of marine pyrite burial flux and isotopic composition
Source: Research Square preprint supplement (doi:10.21203/rs.3.rs-4788953/v1), 2024-11-01
Supplement: Supplementary file 337 [file KFIN.xlsx]

## Sheet: Sheet1
reference	latitude_dd	longitude_dd	water_depth_m	depth_cm	age_yr	porosity_vol_	SO4_mM	H2S_mM	CH4_mM	S_py_wt_	S_AVS_wt_	S0_wt_	TOC_wt_	Fe_HR_wt_	Fe_tot_wt_	d34S_SO4	d34S_H2S	d34S_py	lnSRR_molL_1d_1	lnMOR_molL_1d_1	sed_rate_cmky
Wehrmann2017	78.9905	12.2978	51	0.920836												21.2778
				1.00404						0.0099		4.88e-05
				1.00465							0.00150943
				3.85919												20.505
				4.02504						0.010055		0.000556695
				5.14308						0.0131426		0.000401739
				5.1907							0
				6.9561												20.6604
				6.98925						0.0132373		0.000249652
				7.03256							0
				9.94055												20.7968
				10.0109						0.0111196		0.000323652
				10.0465							0.000755
				12.7562												20.914
				12.9755						0.0127868		0.00066
				13.0605							0.00150943
				15.9133												20.7287
				16.0186							0.000755
				16.0521						0.0144597		5.45e-05
