# Supplementary material for: Quantifying key drivers of marine pyrite burial flux and isotopic composition
Source: Research Square preprint supplement (doi:10.21203/rs.3.rs-4788953/v1), 2024-11-01
Supplement: Supplementary file 340 [file KFMID1.xlsx]

## Sheet: Sheet1
reference	latitude_dd	longitude_dd	water_depth_m	depth_cm	age_yr	porosity_vol_	SO4_mM	H2S_mM	CH4_mM	S_py_wt_	S_AVS_wt_	S0_wt_	TOC_wt_	Fe_HR_wt_	Fe_tot_wt_	d34S_SO4	d34S_H2S	d34S_py	lnSRR_molL_1d_1	lnMOR_molL_1d_1	sed_rate_cmky
Wehrmann2017	78.9645	12.2523	88	0.0506468						0.0181844		0.00150939
				0.111628							0.00150943
				1.33953							0.00226415
				2.84318												20.6741
				2.9551						0.0350001		0.00136878
				3.06977							0.00226415
				4.13023							0.00226415
				5.93454												21.322
				5.97209							0.00150943
				6.03693						0.0177339		0.00120522
				7.08837							0.000755
				8.86329												21.4015
				8.93023							0.00226415
				9.05242						0.0375855		0.00105887
				11.8467												21.6326
				11.9442							0.000755
				12.0238						0.0150107		0.00166148
				14.8258												22.2424
				15.014							0.00226415
				15.211						0.0212348		5.74e-06
				17.8706												20.7287
				18.0279							0.00226415
				18.2337						0.0153292		0.000160696
