# Supplementary material for: Quantifying key drivers of marine pyrite burial flux and isotopic composition
Source: Research Square preprint supplement (doi:10.21203/rs.3.rs-4788953/v1), 2024-11-01
Supplement: Supplementary file 343 [file KFMID2.xlsx]

## Sheet: Sheet1
reference	latitude_dd	longitude_dd	water_depth_m	depth_cm	age_yr	porosity_vol_	SO4_mM	H2S_mM	CH4_mM	S_py_wt_	S_AVS_wt_	S0_wt_	TOC_wt_	Fe_HR_wt_	Fe_tot_wt_	d34S_SO4	d34S_H2S	d34S_py	lnSRR_molL_1d_1	lnMOR_molL_1d_1	sed_rate_cmky
Wehrmann2017	78.957	12.161	83	0.913706												20.1653		-13.3884
				1.05828						0.0159634		0.000708782
				1.06047							0
				3.80711												20.1653		-4.32507
				3.96279							0.000754717
				4.07526						0.0305121		0.00131426
				6.92893												19.9725		-15.7025
				7.03256							0
				7.10008						0.0170309		0.00116504
				9.89848												20.7438		-18.0165
				10.0084						0.0202103		0.00252235
				10.1023							0.00301887
				13.0203												20.3581		-22.0661
				13.0304						0.0165775		0.0144942
				13.0605							0.0113208
				15.9389						0.0189994		0.015091
				16.0186							0.0158491
				16.066												21.1295		-24.1873
				18.8071												22.2865		-26.3085
				19.0326							0.0226415
				19.0709						0.0221903		0.021757
				21.9756						0.0382484		0.0178085
				22.0812												22.6722		-27.3213
				22.1023							0.0249057
