# Supplementary material for: Quantifying key drivers of marine pyrite burial flux and isotopic composition
Source: Research Square preprint supplement (doi:10.21203/rs.3.rs-4788953/v1), 2024-11-01
Supplement: Supplementary file 349 [file KS00-17.xlsx]

## Sheet: Sheet1
reference	latitude_dd	longitude_dd	water_depth_m	depth_cm	age_yr	porosity_vol_	SO4_mM	H2S_mM	CH4_mM	S_py_wt_	S_AVS_wt_	S0_wt_	TOC_wt_	Fe_HR_wt_	Fe_tot_wt_	d34S_SO4	d34S_H2S	d34S_py	lnSRR_molL_1d_1	sed_rate_cmky
Aller2010	5.52796	-52.8356		0.0565986												7.62567
				4.9502												7.02024
				14.745												6.83604
				24.948												6.65026
				34.948												6.61194
				45.1576												7.30614
				55.1815												10.4944
				65.452												19.4017
				75.5543												33.1496
				85.6805												50.1242
