# Supplementary material for: Quantifying key drivers of marine pyrite burial flux and isotopic composition
Source: Research Square preprint supplement (doi:10.21203/rs.3.rs-4788953/v1), 2024-11-01
Supplement: Supplementary file 352 [file L201_1225.xlsx]

## Sheet: Sheet1
reference	latitude_dd	longitude_dd	water_depth_m	depth_cm	age_yr	porosity_vol_	SO4_mM	H2S_mM	CH4_mM	S_py_wt_	S_AVS_wt_	S0_wt_	TOC_wt_	Fe_HR_wt_	Fe_tot_wt_	d34S_SO4	d34S_H2S	d34S_py	lnSRR_molL_1d_1	sed_rate_cmky
Boettcher2006	2.77278	-110.575	3760	0			28.7593
				2			28.3623
				6			28.4864
				14			28.6104
				24			28.0645
				34			28.1141
				42			27.5682
				44			27.9156
				51			27.9156
				62			27.9156
				72			27.1712
				82			27.0471
				90			27.3449
				101			27.3201
				109			27.3449
				120			26.8486
				129			26.8734
				139			26.9727
				149			27.2457
				169			27.0223
				169			27.072
				185			26.6501
				196			26.5012
