# Supplementary material for: Quantifying key drivers of marine pyrite burial flux and isotopic composition
Source: Research Square preprint supplement (doi:10.21203/rs.3.rs-4788953/v1), 2024-11-01
Supplement: Supplementary file 355 [file L201_1226.xlsx]

## Sheet: Sheet1
reference	latitude_dd	longitude_dd	water_depth_m	depth_cm	age_yr	porosity_vol_	SO4_mM	H2S_mM	CH4_mM	S_py_wt_	S_AVS_wt_	S0_wt_	TOC_wt_	Fe_HR_wt_	Fe_tot_wt_	d34S_SO4	d34S_H2S	d34S_py	lnSRR_molL_1d_1	sed_rate_cmky
Boettcher2006	-3.10278	-90.8189	3297	-3.38983			30
				-1.69492			29
				10.1695			28.5
				20.339			27.4167
				22.0339			26.5
				25.4237			25.6667
				25.4237			25
				32.2034			25.5
				33.8983			24.4167
				45.7627			24.75
				47.4576			24.0833
				59.322			24.0833
				67.7966			24.6667
				67.7966			23.6667
				79.661			23.1667
				88.1356			22.9167
				94.9153			22.75
				108.475			22.75
				122.034			21.75
				130.508			22.3333
				140.678			21.6667
				145.763			21.6667
				154.237			21.6667
				161.017			21.6667
				174.576			21.25
				181.356			21.9167
				191.525			20.9167
				6.66148				4.41e-05
				8.30602				0.0166663
				9.85055				0.0930885
				11.4784				0.119677
				7.97822				0.212677
				12.8618				0.292444
				16.1287				0.338977
				39.5689				0.32252
				17.7399				0.375533
				22.7179				0.398821
				15.9953				0.41871
				25.9237				0.481899
				44.0358				0.651454
				50.7806				0.618275
				67.6593				0.525364
				72.3873				0.698152
				82.5046				0.648385
				92.6607				0.575363
				102.872				0.469118
				109.295				0.628629
				115.912				0.671862
				124.312				0.648661
				129.341				0.64205
				121.101				0.568906
				132.874				0.529116
				141.297				0.492627
				151.258				0.535882
				159.592				0.552548
				164.692				0.502748
				153.053				0.462804
				171.471				0.449637
				178.115				0.476259
				189.866				0.449758
				183.238				0.41317
				206.784				0.333591
				198.467				0.306958
				191.788				0.300269
