# Supplementary material for: Quantifying key drivers of marine pyrite burial flux and isotopic composition
Source: Research Square preprint supplement (doi:10.21203/rs.3.rs-4788953/v1), 2024-11-01
Supplement: Supplementary file 358 [file L201_1227.xlsx]

## Sheet: Sheet1
reference	latitude_dd	longitude_dd	water_depth_m	depth_cm	age_yr	porosity_vol_	SO4_mM	H2S_mM	CH4_mM	S_py_wt_	S_AVS_wt_	S0_wt_	TOC_wt_	Fe_HR_wt_	Fe_tot_wt_	d34S_SO4	d34S_H2S	d34S_py	lnSRR_molL_1d_1	sed_rate_cmky
Boettcher2006	-8.99694	-79.9097	427	-0.544218			29.6393
				0			28.5902
				0.544218			26.7541
				1.63265			24.3934
				2.72109			22.2951
				3.80952			18.8852
				7.07483			13.1148
				7.07483			11.0164
				8.16327			9.96721
				9.79592			8.39344
				9.79592			8.13115
				13.0612			6.03279
				14.1497			6.03279
				15.7823			3.93443
				17.9592			4.19672
				22.3129			4.19672
				26.6667			3.67213
				22.3129			2.09836
				31.0204			2.36066
				34.8299			1.83607
				39.1837			1.57377
				45.7143			0.786885
				65.8503			1.04918
				73.4694			1.04918
				75.6463			0.52459
				83.2653			0.52459
				88.1633			1.04918
				94.6939			1.31148
				102.857			1.31148
				106.122			1.04918
				110.476			1.04918
				117.007			0.786885
				120.816			0.786885
				132.245			0.786885
				143.673			0.262295
				0				0.100334
				2.14047				0.83612
				2.14047				0.936455
				2.67559				1.17057
				3.74582				1.83946
				4.81605				2.44147
				6.95652				3.24415
				7.49164				3.64548
				9.09699				3.77926
				15.5184				3.91304
				10.7023				4.58194
				12.8428				4.64883
				19.7993				4.78261
				21.4047				5.41806
				15.5184				5.65217
				17.1237				5.95318
				21.9398				5.91973
				23.5451				6.25418
				25.1505				7.32441
				29.4314				7.19064
				31.0368				6.75585
				35.3177				6.92308
				33.7124				7.29097
				29.9666				7.7592
				32.107				7.72575
				40.6689				6.32107
				34.7826				8.16053
				36.388				8.12709
				36.9231				8.46154
				40.6689				8.46154
				36.9231				8.69565
				39.5987				9.09699
				42.2742				7.95987
				43.3445				7.35786
				47.6254				0.262295
				42.2742				6.98997
				45.4849				6.92308
				50.301				6.15385
				66.3545				5.68562
				56.7224				4.28094
				46.5552				3.91304
				55.1171				1.9398
				73.8461				3.67893
				76.5217				2.44147
				85.6187				3.17726
				87.2241				2.64214
				93.1104				2.77592
				94.7157				2.40803
				103.813				1.9398
				111.304				1.2709
				116.12				1.40468
				120.401				0.83612
				132.709				0.267559
				143.946				0.0334448
				145.017				0.668896
