# Supplementary material for: Quantifying key drivers of marine pyrite burial flux and isotopic composition
Source: Research Square preprint supplement (doi:10.21203/rs.3.rs-4788953/v1), 2024-11-01
Supplement: Supplementary file 361 [file L201_1228.xlsx]

## Sheet: Sheet1
reference	latitude_dd	longitude_dd	water_depth_m	depth_cm	age_yr	porosity_vol_	SO4_mM	H2S_mM	CH4_mM	S_py_wt_	S_AVS_wt_	S0_wt_	TOC_wt_	Fe_HR_wt_	Fe_tot_wt_	d34S_SO4	d34S_H2S	d34S_py	lnSRR_molL_1d_1	sed_rate_cmky
Boettcher2006	-11.075	-78.0853	252	-1.33779			29.6667
				-1.33779			25.6667
				-1.33779			21
				-0.668896			18
				4.01338			15.6667
				9.36455			13.6667
				12.709			10.6667
				14.7157			9
				19.398			7
				23.4114			5.33333
				28.7625			4
				35.4515			2.33333
				0.668896				0.234114
				0.668896				0.602007
				0.668896				1.13712
				0.668896				1.6388
				0				2.17391
				0.668896				2.40803
				0.668896				2.9097
				0.668896				3.37793
				10.0334				3.37793
				4.01338				3.5786
				1.33779				3.71237
				4.68227				4.08027
				8.02676				4.28094
				11.3712				4.54849
				6.68896				4.71572
				16.0535				5.25084
				17.3913				5.61873
				20.7358				5.48495
				24.7492				6.1204
				27.4247				6.42141
