# Supplementary material for: Quantifying key drivers of marine pyrite burial flux and isotopic composition
Source: Research Square preprint supplement (doi:10.21203/rs.3.rs-4788953/v1), 2024-11-01
Supplement: Supplementary file 364 [file L201_1229.xlsx]

## Sheet: Sheet1
reference	latitude_dd	longitude_dd	water_depth_m	depth_cm	age_yr	porosity_vol_	SO4_mM	H2S_mM	CH4_mM	S_py_wt_	S_AVS_wt_	S0_wt_	TOC_wt_	Fe_HR_wt_	Fe_tot_wt_	d34S_SO4	d34S_H2S	d34S_py	lnSRR_molL_1d_1	Sed_rate_mmy	sed_rate_cmky
Boettcher2006	-10.9833	-77.9628	151	0			22.53	2.34							0.9
				0.12			20.84	3.09							0.6
				0.25			20.7	3.36							2.7
				0.4			19.3	3.82							0.6
				0.5			18.37	4.65							1.2
				0.97			16.47	5.84							1.3
				1.42			15.3								1.5
				1.8			14.7	6.15							0.9
				2.34			14.13	6.37							0.7
				3.25			14.13	5.78							1
				3.5			14.27	5.2							1
				5			15.06	4.22							1.2
				6			15.29	4.84							0.9
				8.15			15.18	5.01							0.4
				9.65			15.13	4.64							0.3
				11.15			14.33	4.88							0.7
				12.65			13.31	4.91
				14.15			12.28	4.45							0.5
				15.65			12.23	5.02							0.2
				16.06			12.71	4.44							3.9
				17.65			8.43	5.17							0.4
				19.15			7.22	5.7							0.9
				20.65			6.14	5.88							0.5
				22.15			5.58	5.99
				23.65			4.02	5.56							0.7
				24.65			3.5	5.3							0.4
				25.32			2.88	5.9							0.3
				27.15			1.88	5.68							0.4
				28.65			1.35	5.75							0.4
				30.15			0.96	6.25							0.9
				30.98			0.73	5.48							0.9
				31.65			0.62	5.72							0.2
				33.08			0.29	5.58							0.3
				36.65			0.64	5.38							1.2
				38.15			0.02	5.59							0.6
				39.65			0	5.39							0.5
				40.7			0	5.26							0.2
