# Supplementary material for: Quantifying key drivers of marine pyrite burial flux and isotopic composition
Source: Research Square preprint supplement (doi:10.21203/rs.3.rs-4788953/v1), 2024-11-01
Supplement: Supplementary file 367 [file L201_1231.xlsx]

## Sheet: Sheet1
reference	latitude_dd	longitude_dd	water_depth_m	depth_cm	age_yr	porosity_vol_	SO4_mM	H2S_mM	CH4_mM	S_py_wt_	S_AVS_wt_	S0_wt_	TOC_wt_	Fe_HR_wt_	Fe_tot_wt_	d34S_SO4	d34S_H2S	d34S_py	lnSRR_molL_1d_1	sed_rate_cmky
Boettcher2006	-12.0247	-81.9067	4827	-0.848295			28.6711
				0.991381			28.4311
				3.09883			28.9162
				6.48792			28.1541
				9.18816			28.9619
				12.2236			29.1659
				15.5759			29.1286
				19.243			28.8903
				22.305			28.5709
				25.6819			28.0504
				31.7548			28.4182
				34.496			28.4206
				39.3834			28.143
				41.1883			28.5876
				44.5426			28.51
				47.9031			28.3117
				51.284			27.7107
				54.6731			26.9486
				57.3631			27.9577
				59.816			27.6377
				64.0841			27.5609
				67.5202			25.8727
				70.7907			27.4461
				72.9472			26.9648
				76.6082			26.8472
				80.2569			26.9713
				83.5887			27.3366
				86.3503			26.9364
				89.9724			27.5839
				92.7135			27.5863
				94.543			27.5477
				98.8069			27.5515
				102.18			27.1115
				105.211			27.3961
				106.141			27.0748
				110.462			25.9511
				111.652			26.5159
				113.465			26.7994
