# Supplementary material for: Quantifying key drivers of marine pyrite burial flux and isotopic composition
Source: Research Square preprint supplement (doi:10.21203/rs.3.rs-4788953/v1), 2024-11-01
Supplement: Supplementary file 370 [file LB2002_D.xlsx]

## Sheet: Sheet1
reference	latitude_dd	longitude_dd	water_depth_m	depth_cm	age_yr	porosity_vol_	SO4_mM	H2S_mM	CH4_mM	S_py_wt_	S_AVS_wt_	S0_wt_	TOC_wt_	Fe_HR_wt_	Fe_tot_wt_	d34S_SO4	d34S_H2S	d34S_py	lnSRR_molL_1d_1	lnMOR_molL_1d_1	sed_rate_cmky
Llobet-Brossa2002	53.4758	8.2231		0.178971			22.6458									20.6931
				0.394275															0.00303
				0.479139			22.4361
				0.626398												21.2871
				0.705257			22.7968
				1.42211			22.0223
				1.43177												21.0891
				1.48496			22.6662
				1.57446															0.0221621
				2.41611												21.4852
				2.4277			22.3239
				2.43048			21.4668
				2.4778															0.0109227
				3.43051			23.4825
				3.44519												22.0792
				3.48001															0.0248162
				4.34542			21.7111
				4.42953												21.4852
				4.43957			22.7126
				4.45322															0.0193373
				5.32439												22.0792
				5.48157			21.8004
				5.49715															0.017263
				5.87305			21.2351
				6.4665															0.022517
				6.4877												22.0792
				6.48879			21.602
				7.4313			21.3311
				7.47204												21.8812
				7.50911															0.0241076
				8.36689												23.4653
				8.4072			20.775
				8.4826															0.0178434
				9.30649												23.0693
				9.45496															0.0147206
				9.47657			21.4346
				10.3945			18.7348
				10.4607															0.0189282
				10.8725												24.4554
				11.0088			19.5301
				11.5001															0.0294192
				12.4031			20.1235
				12.4421															0.010589
				12.9599			18.6322
				12.9754												24.4554
				13.4866															0.00694
				14.3844			19.9403
				14.4951															0.0033
				14.8098												24.8515
				14.9721			18.9495
				16.8233												25.6436
				16.9835			19.4811
				18.8814												25.8416
				19.0042			17.1558
