# Supplementary material for: Quantifying key drivers of marine pyrite burial flux and isotopic composition
Source: Research Square preprint supplement (doi:10.21203/rs.3.rs-4788953/v1), 2024-11-01
Supplement: Supplementary file 373 [file M1.xlsx]

## Sheet: Sheet1
reference	latitude_dd	longitude_dd	water_depth_m	depth_cm	age_yr	porosity_vol_	SO4_mM	H2S_mM	CH4_mM	S_py_wt_	S_AVS_wt_	S0_wt_	TOC_wt_	Fe_HR_wt_	Fe_tot_wt_	d34S_SO4	d34S_H2S	d34S_py	lnSRR_molL_1d_1	lnMOR_molL_1d_1	sed_rate_cmky
Pellerin2018	56.1132	10.33		0			27.1709
				1.5															0.002267
				2.7			24.721
				4.5															0.00383096
				7.5															0.0028522
				10.5															0.00222467
				13.5															0.00173354
				15															2.75e-05
				16.5															0.000783918
				19.5															0.000655
				22.5															0.000578978
				23.5			21.1208
				25															1.65e-05
				25.5															0.000149575
				28.5															0.00010731
				31.5															0.000108825
				34.5															0.000113326
				35															8.77e-06
				38															5.31e-05
				41															3.4856e-05
				44															3.24e-05
				45															5.49e-06
				47															2.37e-05
				48.5			20.1188
				50															2.01e-05
				53															1.35e-05
				56															1.27e-05
				65															3.65e-06
				73.5			17.0803
				75															7.85e-06
				85															1.76e-06
				95															5.13e-07
				98.5			15.0816
				105															1.46e-05
				115															5.74e-06
				123.5			13.0123
				125															8.86e-07
				135															1.29e-06
				145															6.59e-07
				148.5			10.8908
				165															1.74e-07
				173.5			8.75466
				175															5.82e-08
				185															4.81e-08
				195															3.73e-08
				198.5			6.35508
				205															3.13e-08
				215															2.67e-08
				223.5			4.16219
				225															2.47e-08
				235															6.47e-08
				245															1.32e-07
				248.5			2.10571
				265															9.31e-08
				273.5			0.794567
				275															9.96e-08
				285															5.05e-08
				295															4.44e-08
				298.5			0.203979
				305															9.92e-08
				315															7.03e-08
				323.5			0.0305267
				325															3.51e-08
				335															5.28e-08
				345															3.72e-08
				348.5			0.00426208
				365															3.12e-08
				373.5			0.0184962
				375															4.13e-08
				385															3.95e-08
				395															7.55e-08
				398.5			0.0480364
				405															5.11e-08
				415															4.74e-08
				423.5			0.010456
				425															1.86e-08
				435															3.64e-08
				445															6.61e-08
				448.5			0.0114089
				465															1.01e-07
				473.5			0.00670391
				475															2.8e-08
				485															3.11e-07
				495															2.05e-07
				498.5			0.0127787
				523.5			0.00604879
				548.5			0.00378562
				573.5			0.00307094
				598.5			0.0222483
