# Supplementary material for: Quantifying key drivers of marine pyrite burial flux and isotopic composition
Source: Research Square preprint supplement (doi:10.21203/rs.3.rs-4788953/v1), 2024-11-01
Supplement: Supplementary file 376 [file M2018_AB.xlsx]

## Sheet: Sheet1
reference	latitude_dd	longitude_dd	water_depth_m	depth_cm	age_yr	porosity_vol_	SO4_mM	H2S_mM	CH4_mM	S_py_wt_	S_AVS_wt_	S0_wt_	TOC_wt_	Fe_HR_wt_	Fe_tot_wt_	d34S_SO4	d34S_H2S	d34S_py	lnSRR_molL_1d_1	lnMOR_molL_1d_1	sed_rate_cmky
Masterson2018	24.6363	-110.601	408	1		0.93	27.1		0.00047							21.7
				5.25509															0.167066
				6.5					0.00138							22.7
				9.03551															0.144922
				9.25		0.93	26.65
				12					0.002225							23.9
				12.8177															0.121925
				14.75		0.92	26.19
				17.5					0.00278							25.7
				20.25		0.91	23.94
				20.9744															0.0904225
				23					0.00376							26.6
				25.75		0.91	23.26
				28.5					0.004625
				29.7217															0.0742633
				31.25		0.9	23.48
				33		0.9	22.58
				34					0.005035							29.2
				34.5					0.00501							29.6
				36.75		0.89	23.03
				39.5					0.00647							31.5
				42.25		0.89	21.9
				45					0.00689							33
				47.75		0.88	23.48
				50.2841															0.0632638
				70		0.87	16.03
				73.5					0.0152
				77.0812															0.0471749
				103.871															0.034495
				113		0.85	10.84
				114.5					0.0222
				131.892															0.0286381
				155		0.84	4.29
				156.5					0.0873
				163.631															0.0304661
				192.241															0.0408046
				193		0.83	3.16
				194.5					1.172
				202.16															0.0595932
				213.935															0.084355
				223.235															0.101437
				228.284															0.0682176
				232.732															0.0239167
				234		0.83	1.35
				235.5					1.95
				244.593															0.00692
				268.878															0.0019
				273		0.83	2.26
				274.5					4.235
				298.131															0.00201
