# Supplementary material for: Quantifying key drivers of marine pyrite burial flux and isotopic composition
Source: Research Square preprint supplement (doi:10.21203/rs.3.rs-4788953/v1), 2024-11-01
Supplement: Supplementary file 379 [file M2020_AC.xlsx]

## Sheet: Sheet1
reference	latitude_dd	longitude_dd	water_depth_m	depth_cm	age_yr	porosity_vol_	SO4_mM	H2S_mM	CH4_mM	S_py_wt_	S_AVS_wt_	S0_wt_	TOC_wt_	Fe_HR_wt_	Fe_tot_wt_	d34S_SO4	d34S_H2S	d34S_py	lnSRR_molL_1d_1	lnMOR_molL_1d_1	sed_rate_cmky
Michaud2020	77.538	15.657	56	0.438597															0.000121212
				0.5		0.71
				0.768792			29.6873
				1.5		0.81
				1.53509															0.000161616
				2.14983			28.6726
				2.5		0.64
				2.5															0.00020202
				3.4		0.77
				3.53856			28.9041
				3.55263															8.08081e-05
				4.00963			30.3052
				4.5		0.67
				4.51754															0.000525253
				4.76978			28.5906
				5.52632															0.000161616
				5.68983			27.8104
				6		0.64
				6.57895															0.000121212
				6.77027			28.0423
				7.45614															0.000161616
				8		0.62
				8.31314			28.2735
				8.42105															0.000282828
				9.23175			27.2596
				9.47368															0.000323232
				9.70042			28.2713
				10		0.71
				10.4825															0.000363636
				11.4474															0.000444444
				11.8579			28.1901
				12.5		0.54													0.000242424
				13.5088															0.000525253
				14.0159			28.1867
				14.5175															0.000686869
				15.5702															0.000444444
				16		0.53
				16.3596															0.000484849
				17.5															0.00040404
				18.0212			27.7909
				18.4211															0.000525253
				19.4298															0.000727273
				19.8729			28.0996
				20.4825															0.00113131
				21.4474															0.000525253
				24.647			27.3911
				30.0458			28.0057
				39.9109			27.9901
				49.9316			28.208
				60.1065			28.4256
				69.8184			28.5661
				79.9938			28.8616
