# Supplementary material for: Quantifying key drivers of marine pyrite burial flux and isotopic composition
Source: Research Square preprint supplement (doi:10.21203/rs.3.rs-4788953/v1), 2024-11-01
Supplement: Supplementary file 382 [file M2020_J.xlsx]

## Sheet: Sheet1
reference	latitude_dd	longitude_dd	water_depth_m	depth_cm	age_yr	porosity_vol_	SO4_mM	H2S_mM	CH4_mM	S_py_wt_	S_AVS_wt_	S0_wt_	TOC_wt_	Fe_HR_wt_	Fe_tot_wt_	d34S_SO4	d34S_H2S	d34S_py	lnSRR_molL_1d_1	lnMOR_molL_1d_1	sed_rate_cmky
Michaud2020	79.715	11.077	211	0.395604															0.042973
				0.5		0.81
				0.703527			27.9567
				1.45055															0.0283784
				1.5		0.69
				1.85658			27.7249
				2.46154															0.0425676
				2.5		0.68
				3.24211			27.143
				3.38462															0.0664865
				3.4		0.67
				4.27641			27.4951
				4.43956															0.0912162
				4.5		0.72
				5.08649			26.8538
				5.45055															0.111486
				6		0.66
				6.12546			26.4466
				6.46154															0.0968919
				7.51648															0.0502703
				8		0.61
				8.08321			26.4497
				8.48352															0.045
				9.49451															0.0567568
				9.80956			26.6276
				10		0.67
				10.4615															0.0604054
				11.5604															0.0381081
				11.8857			26.1052
				12.5		0.62													0.0316216
				13.4945															0.0218919
				14.1943			25.2327
				14.5055															0.0332432
				15.5165															0.0283784
				16		0.64	24.2425
				16.4835															0.0275676
				17.4505															0.0190541
				17.8877			23.8951
				19.618			23.4305
				24.9194			22.7964
				29.8897			19.8253
				40.0451			16.3951
				49.9608			14.4831
				59.9935			12.2794
				69.9096			10.3091
				80.055			8.51434
