# Supplementary material for: Quantifying key drivers of marine pyrite burial flux and isotopic composition
Source: Research Square preprint supplement (doi:10.21203/rs.3.rs-4788953/v1), 2024-11-01
Supplement: Supplementary file 385 [file M2020_P.xlsx]

## Sheet: Sheet1
reference	latitude_dd	longitude_dd	water_depth_m	depth_cm	age_yr	porosity_vol_	SO4_mM	H2S_mM	CH4_mM	S_py_wt_	S_AVS_wt_	S0_wt_	TOC_wt_	Fe_HR_wt_	Fe_tot_wt_	d34S_SO4	d34S_H2S	d34S_py	lnSRR_molL_1d_1	lnMOR_molL_1d_1	sed_rate_cmky
Michaud2020	78.966	12.256	90	0.43956															0.0247297
				0.5		0.77
				0.808081			29.186
				1.45055															0.0077027
				1.5		0.64
				2.19336			29.3605
				2.46154															0.00121622
				2.5		0.48
				3.23232			29.1279
				3.4		0.64
				3.42857															0.00364865
				4.48352															0.00283784
				4.5		0.52
				4.6176			29.186
				5.36264															0.00851351
				5.88745			29.3023
				6		0.55
				6.54945															0.0101351
				6.92641			29.3605
				6.92641			29.3605
				7.38462															0.0077027
				8		0.63
				8.31169			29.2442
				8.43956															0.00810811
				9.49451															0.00689189
				10		0.56
				10.0433			29.3605
				10.4615															0.00567568
				11.5165															0.00486487
				12.0058			29.3023
				12.5		0.58
				12.6593															0.00324324
				13.4945															0.00445946
				13.9683			29.2442
				14.5055															0.00283784
				15.4725															0.00283784
				15.9307			29.1279
				16.5275															0.00324324
				17.5824															0.00324324
				18.0087			28.7209
				18.3736															0.00324324
				19.3846															0.00405405
				20		0.6
				20.0866			29.0698
				25.0505			28.7791
				29.899			28.4302
				39.9423			28.4884
				49.9856			27.7907
				60.1443			26.9767
				69.8413			26.3372
				80			26.2209
