# Supplementary material for: Quantifying key drivers of marine pyrite burial flux and isotopic composition
Source: Research Square preprint supplement (doi:10.21203/rs.3.rs-4788953/v1), 2024-11-01
Supplement: Supplementary file 388 [file M24.xlsx]

## Sheet: Sheet1
reference	latitude_dd	longitude_dd	water_depth_m	depth_cm	age_yr	porosity_vol_	SO4_mM	H2S_mM	CH4_mM	S_py_wt_	S_AVS_wt_	S0_wt_	TOC_wt_	Fe_HR_wt_	Fe_tot_wt_	d34S_SO4	d34S_H2S	d34S_py	lnSRR_molL_1d_1	lnMOR_molL_1d_1	sed_rate_cmky
Pellerin2018	56.1015	10.4148		0												21.4
				0			25.8643	0	1							21
				1															0.00618233
				1															0.00901524
				1.25			25.1984	0.000101457								21.5
				2															0.00792235
				2															0.00758605
				2.5			24.8409	0.000312177								21.8			0.00532571
				3															0.00702782
				3															0.00810633
				4															0.00632815
				4															0.00356811
				4															0.00693954
				5															0.00416434
				5			25.0931	0.00818684								22			0.00453064
				6															0.00494151
				6															0.00483263
				7															0.00641435
				7															0.00289047
				7															0.00480411
				7.5			25.2232	0.00671961								22.5	-30.5		0.00261901
				8															0.00287631
				8															0.00344447
				9															0.00429473
				9					2										0.00334488
				10															0.00472321
				10															0.00182892
				11															0.00482149
				11															0.00296903
				12															0.00250346
				12															0.0027559
				12															0.0026798
				12.5			22.7995	0.324274								27.2	-34.3		0.000806479
				13															0.00245351
				14															0.0040815
				14															0.00223076
				14															0.00198985
				15			22.0202	0.65284								28.6	-34.9		0.0029525
				16															0.00224622
				16															0.00236634
				17															0.00210829
				17															0.00128443
				17.5			22.1223	0.641133								28.8	-35.3		0.00165142
				18															0.00151321
				18															0.000907592
				18					2										0.000716469
				19					3										0.00102967
				20															0.000816183
				20															0.0006427
				20			21.5571	0.938092								29.4	-36.2		0.000836383
				21															0.000378352
				21															0.000893286
				21															0.000687144
				22															0.000585177
				22.5			20.9764	1.25495								30.9	-37.7		0.000566199
				22.5			21.1142	0.950188								30.4	-37
				23															0.000546712
				23															0.000597759
				24															0.000739404
				24															0.000961541
				25			20.5027	1.13554								31.7	-37.5		0.00167572
				26															0.000675768
				26															0.000639464
				27.5			20.0618	0.930677								32.1	-37.2		0.000292746
				29					3
				30			20.316	0.957993								32.1	-36.2
				32.5			20.2079	0.960724								32.3	-35.7		0.000207933
				35			20.3108	1.02199								32.7	-36.4
				36
				37.5			20.0222	1.07311								33.2	-36.6		0.000373702
				38					4
				39					0
				40			19.3129	1.05828								33.6	-36.4		0.000320728
				42.5			19.3262	1.24637								33.8	-36.5		0.000278809
				42.5			19.3753	1.12618								33.8	-37.5
				45			19.0091	1.10237								34	-36
				46												35.3	-31.5
				47.5			19.1426	1.40753								34.4	-35.9		0.000161233
				49					4
				50			17.5672	1.30022								34.8	-34.6
				52.5			17.7164	1.45045								35.4	-35.3		8.73244e-05
				55			17.8805	1.1492								35.9	-34.4
				57.5			18.0443	1.57493								36.2	-33.8		0.000109815
				58					6
				59					5
				60			17.4915	1.53006								36.8	-33.1		7.30115e-05
				62.5															3.44618e-05
				62.5			18.1543	1.43406								36.4	-34.7
				62.5			17.1483	1.48011								37.2	-32.5
				69					6
				76
				78					6
				80															3.63911e-05
				82.5			15.5352	1.77824								38.7	-31.7
				86												39.8	-37.2
				98					8
				100															3.37424e-05
				102.5			15.1503	1.73219								41	-28.1
				116
				118					8
				120															2.90333e-05
				122.5			14.2429	1.676								43.5	-24.4
				126												44.5	-26.2
				138					8
				140															1.91283e-05
				142.5			12.9344	1.76302								46.2	-21.8
				158					10
				160															9.34133e-06
				162.5			11.7466	1.72829								49.1	-18.5
				176
				178					15
				180															1.81141e-05
				182.5			10.4644	1.72283								50.2	-15
				186												52.3	-17
				198					13
				200															1.56768e-05
				202.5			9.27233	2.00105								54.9	-13
				218					21
				220															1.34566e-05
				222.5			8.10895	2.63907								58	-10
				226												58.2	-11.4
				238					12
				240															1.24479e-05
				242.5			6.7892	2.41586								61.9	-7.7
				254												64.9	-4.7
				258					14
				260															6.50132e-06
				262.5			5.80686	1.57376								65.4	-3.8
				273												67.2	-3
				278					21
				279												70
				280															7.3401e-06
				282.5			4.9199	2.6578								69.2	-0.4
				298					34								1.9
				300															7.35803e-06
				302.5			3.80936	2.16104								75.2	3.1
				304												73.7	5.3
				318					21
				320															5.5072e-06
				322.5			2.78984	2.45761								81	7.5
				323												76.8	7.5
				328					33
				329												80.9	11.4
				338					52
				340															1.63308e-05
				342.5			1.6754	2.71204									13
				348					90							87.4	15
				354												94.3	17.7
				358					104
				360															1.2678e-05
				362.5			0.869506	2.27928									16.8
				368					141
				373												99.7	20.7
				378					322
				380															6.24737e-08
				383					399
				393					426
				398					689
				400															5.8137e-09
				402.5				1.8434									23.5
				403					597
				408					912
				413					846
				418					1116
				420															1.17992e-08
				422.5				2.06271									23.2
				423					1151
				428					989
				433					1080
				438					1356
				440															3.74962e-08
				442.5
				443					1117
				448					1516
				453					1367
				458					1917
				460															2.28257e-08
				462.5				1.25144									22.7
				463					1998
				468					1600
				473					1660
				478					1655
				480															3.8512e-08
				482.5				1.18744									21.6
