# Supplementary material for: Quantifying key drivers of marine pyrite burial flux and isotopic composition
Source: Research Square preprint supplement (doi:10.21203/rs.3.rs-4788953/v1), 2024-11-01
Supplement: Supplementary file 391 [file M5.xlsx]

## Sheet: Sheet1
reference	latitude_dd	longitude_dd	water_depth_m	depth_cm	age_yr	porosity_vol_	SO4_mM	H2S_mM	CH4_mM	S_py_wt_	S_AVS_wt_	S0_wt_	TOC_wt_	Fe_HR_wt_	Fe_tot_wt_	d34S_SO4	d34S_H2S	d34S_py	lnSRR_molL_1d_1	lnMOR_molL_1d_1	sed_rate_cmky
Pellerin2018	56.1015	10.4466		0			27.9582	0.000603215
				0.5			26.5405	0.000150804
				0.6															0.0121173
				1.8															0.00865933
				3															0.00751893
				4.2															0.00729545
				4.5			25.5483	0.0456935
				5.4															0.00610308
				6.6															0.0047346
				7				2.86527
				7.8															0.00323172
				8.5			20.6472	0.339308
				10.2															0.00195897
				11.4															0.00161466
				12.5			20.7826	0.527813
				13.8															0.00127103
				15															0.00121722
				16.5			21.0323	0.429791
				17.4															0.00109351
				18.6															0.000977579
				20				5.6853
				20.5			19.2413	1.11595
				21															0.000805825
				22.2															0.000732535
				24.5			17.3617	2.57874
				24.6															0.000664534
				25.8															0.000645448
				28.2															0.00046658
				28.5			14.4927	2.82003
				29.4															0.000471791
				30				4.59197
				30				5.70038
				32.5			14.89	4.00384
				35			10.0549
				35.4															0.000339497
				36.5			12.9901	3.3026
				36.6															0.00040772
				37.8															0.000416299
				38															7.18e-05
				39			7.82965
				39															0.00054295
				40				7.81163											0.000144584
				40.5			9.92586	4.13202
				42															0.000101967
				42.6															0.000333622
				43			6.06529
				43.8															0.000433967
				44															9.4e-05
				44.5			7.85716	3.46849
				46															0.000136255
				46.2															0.00049302
				47			4.78486
				47.4															0.000110146
				48															0.000121096
				48.5			7.56192	5.48926
				49.8															8.0158e-05
				50				6.95205											0.000103019
				51			4.62753												0.000192431
				52															0.000216824
				52.5			5.82872	5.79086
				53.4															0.000205456
				54															0.000114611
				54.6															1.43e-05
				55			2.84052	7.23858
				56															6.32e-05
				56.5			3.2342	6.33376
				57															2.48e-05
				58															0.000319126
				58.2															5.6e-05
				59			1.6338
				60				6.83141											0.000252842
				60.5			0.988601	6.80125
				60.6															5.6e-05
				61.8															6.01e-05
				62															0.000182567
				64.2															6.01e-05
				64.5			0.171206	6.379
				65															0.000462535
				65				7.49495
				65.4															0.000194051
				68															0.000313451
				68			0.365886
				70				6.28852
				71															0.00019877
				74															0.000153415
				77															0.000345068
				77			0.0163504
				80															6.6126e-05
				80				6.36392
				83															6.95e-05
				86															6.06e-06
				86			0.00617773
				89															7.36e-06
				90				6.06231
				95															5.94e-06
				98															3.71e-06
				100			0.0149501
				101															3.87e-06
				105															2.54e-06
				108															3.83e-07
				111															7.95e-07
				114															1.93e-06
				114			0.00893711
				120				5.00668
				123															2.23e-06
				126															9.52e-07
				129															9.09e-07
