# Supplementary material for: Quantifying key drivers of marine pyrite burial flux and isotopic composition
Source: Research Square preprint supplement (doi:10.21203/rs.3.rs-4788953/v1), 2024-11-01
Supplement: Supplementary file 394 [file MD161-13.xlsx]

## Sheet: Sheet1
reference	latitude_dd	longitude_dd	water_depth_m	depth_cm	age_yr	porosity_vol_	SO4_mM	H2S_mM	CH4_mM	S_py_wt_	S_AVS_wt_	S0_wt_	TOC_wt_	Fe_HR_wt_	Fe_tot_wt_	d34S_SO4	d34S_H2S	d34S_py	lnSRR_molL_1d_1	lnMOR_molL_1d_1	ExtraVar1	ExtraVar2	ExtraVar3	ExtraVar4	ExtraVar5	ExtraVar6	ExtraVar7	ExtraVar8	ExtraVar9	ExtraVar10	ExtraVar11	ExtraVar12	ExtraVar13	ExtraVar14	ExtraVar15	ExtraVar16	ExtraVar17	sed_rate_cmky
Peketi2015	16.0328	81.7132	647	5			26.5		0.0043							27.7
				15	250					0.0054								0.005
				25	260					0.0367			0.7	1.74	7.8			0.032
				55	300					0.027			0.99	1.76	7.7			0.024
				85	340					0.0401			1.09	1.7	8			0.035
				130	400					0.0682			1.19	1.73	7.9			0.059
				155			16.1		0.0036							53.8
				205	500					0.0734			1.2	1.61	7.7			0.064
				235	540					0.1961			1.01	1.83	7.9			0.171
				265	580					0.0604			1.07	1.67	7.7			0.053
				295	620					0.0786			1.18	1.56	7.7			0.068
				305.5			10.7									71.4
				325	660					0.1309			1.02	1.63	7.9			0.114
				340	680					0.0871			1.22		7.8			0.076
				400	770					0.0679			1	1.72	7.9			0.059
				455			6.9		0.0018							92.4
				465	850					0.0332			0.96					0.029
				475	870					0.0472				1.61	7.8			0.041
				520	930					0.0935				1.8	7.8			0.081
				535	950					0.0636			0.98	1.61	7.7			0.055
				595	1030					0.0679			1	1.71	7.7			0.059
				605.5			0.2
				623	1060					0.0913			1.23	1.61	7.7			0.08
				650	1100					0.093			1.34	1.66	7.9			0.081
				710	1180					0.1113				1.65	7.8			0.097
				740	1220					0.1167			1.34	1.78	7.9			0.102
				755					0.006
				765	1250					0.1364			1.15	1.72	7.8			0.119
				825	1330					0.1309			1.38	1.68	7.9			0.114
				870	1390					0.124			1.36	1.73	7.6			0.108
				900	1420					0.1651			1.34	1.85	7.9			0.144
				905.5					0.0448
				915	1460					0.0781			1.35					0.068
				940	1520					0.1152			1.01	1.8	8.1			0.1
				970	1600					0.1191			1.38		7.6			0.104
				1015	1710					0.0752			1.39	1.68	7.9			0.065
				1035	1790					0.0888			1.61	1.74	7.8			0.077
				1055					0.0901
				1065	1820					0.1154			1.51	1.68	7.9			0.1
				1095	1850					0.1387			1.72	1.52	8			0.121
				1140	1890					0.1478			1.69	1.67	7.8			0.129
				1185	1930					0.135			1.25	1.67	7.7			0.118
				1205.5
				1255	2000					0.1331			1.44	1.65	7.7			0.116
				1270	2020					0.087			1.57	1.66	7.9			0.076
				1315	2060					0.1451			1.71	1.73	7.6			0.126
				1330	2070					0.1464			1.69	1.56	7.8			0.127
				1355					0.2832
				1365	2150					0.2052			1.72	1.64	7.7			0.179
				1380	2200					0.2568			1.73	1.84	7.7			0.224
				1410	2300					0.2061			1.64	1.7	7.6			0.18
				1470	2510					0.179			1.64	1.77	7.4			0.156
				1505.5
				1525	2620					0.1681			1.7	1.64	7.3			0.146
				1540	2650					0.1832			1.58	1.54	7.6			0.16
				1585	2740					0.1941			1.76	1.68	7.2			0.169
				1600	2770					0.2271			1.74	1.65	7.53			0.198
				1615	2800					0.2233			1.59	1.75	7.6			0.194
				1645	2860					0.1852			1.28	1.63	7.7			0.161
				1655					0.8395
				1680	2930					0.1543			1.49	1.59	7.3			0.134
				1710	2990					0.1395			1.9	1.65	7.2			0.122
				1740	3050					0.2266			2.36	1.57	7.2			0.197
				1755	3080					0.2575			1.76	1.74	7.1			0.224
				1770	3110					0.2243				1.47	7.1			0.195
				1805.5
				1815	3200					0.2431			1.74		7.4			0.212
				1823	3220					0.2076				1.56	7.7			0.181
				1840	3250					0.1222			1.73	1.4	7.6			0.106
				1870	3310					0.1698				1.51	7			0.148
				1915	3400					0.1866			1.59	1.52	7.1			0.162
				1950	3480					0.2427			1.74	1.4	6.5			0.211
				1955					1.93
				1965	3510					0.2195			1.72	1.56	7.1			0.191
				2010	3600					0.216			1.73	1.47	6.9			0.188
				2055	3690					0.268			1.76	1.33	6.5			0.233
				2100	3780					0.2534				1.43	6.9			0.221
				2105.5
				2115	3810					0.1211			1.67					0.105
				2140	3860					0.231			1.72	1.51	6.7			0.201
				2155	3890					0.191			1.67	1.52	7			0.166
				2170	3920					0.14			1.76	1.46	6.8			0.122
				2215	4010					0.1902				1.64	6.9			0.166
				2255					2.4407
				2265	4107					0.16				1.46	6.9			0.139
				2405.5
				2555					4.941
