# Supplementary material for: Quantifying key drivers of marine pyrite burial flux and isotopic composition
Source: Research Square preprint supplement (doi:10.21203/rs.3.rs-4788953/v1), 2024-11-01
Supplement: Supplementary file 397 [file N2004_7.xlsx]

## Sheet: Sheet1
reference	latitude_dd	longitude_dd	water_depth_m	depth_cm	age_yr	porosity_vol_	SO4_mM	H2S_mM	CH4_mM	S_py_wt_	S_AVS_wt_	S0_wt_	TOC_wt_	Fe_HR_wt_	Fe_tot_wt_	d34S_SO4	d34S_H2S	d34S_py	lnSRR_molL_1d_1	lnMOR_molL_1d_1	sed_rate_cmky
Neretin2004	43.5219	30.2306	1176	0.26978									5.10545
				2.0855										0.381746
				2.63677						1.80248	0.00424388	0.0310992
				7.51196						1.23286		0.0198391
				9.375				0.25876	0.0109585
				10.8007									5.19279
				17.441									6.36022
				17.767										0.120082
				18.5685						0.959901	0.0105813	0.0214477
				30.6224									6.80663
				31.0511										0.319202
				32.9935						1.65746	0.0254121	0.033244
				35.8239									5.63628
				36.8823						1.16807	0.00832847	0.0230563
				37.5624										0.771168
				44.2146										0.84362
				44.3807						2.3631		0.0294906
				44.4444														-37.0552
				45.9714						1.07162		0.0230563
				46.6521										0.274402
				54.0866			11.8484
				56.9756									7.51957
				57.2917				0.653369	0.0149806
				57.551						2.34678	0.00396513	0.0337802
				58.6723										0.880118
				62.4551			10.9491
				63.7627									11.4747
				63.9899										1.54892
				66.2201						1.00702	0.0145805	0.0380697
				66.6667														-33.9264
				70.8333				0.595148	0.0146923
				74.3267									12.1916
				75.0762			11.2231
				77.3824						1.04689	0.0081123	0.0504021
				77.7938										0.347453
				81.25				0.669542	0.00889429
				83.7028									15.3367
				84.4174						0.870272	0.00164977	0.0509383
				86.4583				0.81186	0.0196403
				86.6262			11.0138
				87.715										0.609744
				87.7193														-29.5092
				94.5553						0.878079	0.0314593	0.0428954
				94.9947			10.1145
				95.6015									16.413
				96.875				0.802156	0.0193215
				101.14										0.429349
				104.355										0.763765
				104.642						0.73348	0.059164	0.0428954
				105.006									20.0977
				105.263														-30.4294
				105.479			9.56007
				107.292				0.656604	0.0245883
				114.155									18.9264
				114.583				0.692183	0.0297488
				116.817						0.773329	0.00361242	0.0922252
				116.959														-36.6871
				119.128			9.28135
				120.044										0.484028
				124.298										1.01726
				126.03									19.553
				126.137						1.35869	0.212649	0.123861
				132.282										0.5024
				132.748			8.31203
				134.014									21.2596
				134.503														-22.8834
				136.118						0.901263	0.178459	0.0761394
				136.458				0.640431	0.0292024
				136.589									20.1799
				139.181														-26.3804
				141.223						1.01345	0.139997	0.111528
				141.279									9.2974
				142.27										0.583969
				143.163									20.0883
				144.645									23.2354
				146.292									4.52999
				146.353									5.69904
				149.708														-20.3068
				150.213										0.177537
				151.356						1.00522	0.016236	0.0632708
				155.161										0.342567
				156.25						0.491746	0.00762875	0.0546917
				156.25				0.750404	0.0286863
				156.756									3.35835
				156.895			7.82422
				160.208										0.241034
				160.234														-11.4724
				164.377										0.25469
				165.981									3.62587
				171.909										0.207435
				172.564									3.71417
				173.099														-30.4294
				173.905						1.75073	0.0352879	0.0782842
				173.958				0.737466	0.0336951
				175.778			7.06112
				176.479									3.08372
				183.572										0.275491
				187.021						1.57398	0.018136	0.160322
				188.304														-25.4601
				188.355			6.29917
				188.561										0.32983
				196.087										0.296128
				197.661														-19.2025
				198.958				0.750404	0.121166
				202.221						1.56564	0.0265897	0.180161
				202.751										0.336954
				204.678														-15.8896
				205.445									3.43631
				205.862										0.953747
				206.278						1.57358	0.0458237	0.166756
				208.294			5.67401
				210.293										0.26259
				212.5				0.601617	0.368612
				214.035														-26.3804
				215.335						1.38087	0.0606659	0.0986595
				218.636										0.276348
				219.88									2.71333
				221.168										0.201862
				222.204						0.71495	0.0137044	0.0262735
				225.731														-32.0859
				226.149			5.46358
				230.337										0.242749
				230.349									1.63162
				232.292				0.672776	0.593898
				233.242						0.385839	0.00509721	0.016622
				236.224										0.127682
				237.427														-29.5092
				239.527									0.999871
				243.275														-18.4663
				244.358						0.289347	0.00502894	0.00375335
				245.412										0.114352
				248.189			4.83803
				249.577										0.141563
				255.208				0.68248	0.742126
				256.14														14.2945
				259.688						0.666028	0.0198541	0.00160858
				260.435										0.128274
				260.56									0.634987
				267.069										0.250424
				270.247			4.62685
				270.833				0.575741	0.917872
				272.515														10.0613
				274.943						0.818112	0.00274202	0.00589812
				275.425										0.230297
				278.981									0.630459
				280.477										0.11521
				280.702														7.48466
				284.194						1.20294	0.00693471	0.00214477
				284.619										0.203413
				291.667				0.459299	1.21477
				292.302			4.3466
				292.99										0.142624
				294.789									0.986285
				298.246														13.0061
				299.308						0.937917	0.0110933	0.00482574
				301.308										0.224153
				304.094														7.30061
				307.292				0.355795	1.73766
				308.365										1.45776
				308.772														4.90798
				310.67						1.57137	0.20522	0.00268096
				312.144										0.271858
				312.255			4.06673
				314.399						0.608721	0.0558417	0.0847185
				316.959														6.93252
				318.013										0.20423
				318.473									0.980462
				320.8						1.55511	0.0216916	0.00375335
				321.704			3.85784
				322.807														17.6074
				323.731									0.889241
				324.228						2.7021	0.24986	0.013941
				324.549										0.590685
				325.146														4.17178
				326.042				0.126146	2.0401
				329.671										0.28584
				329.825														-0.245399
				335.541										0.218213
				336.136						1.94783	0.057884	0.00428954
				338.111						1.79538	0.0322501	0.0160858
				339.181														3.25153
				339.979										1.75672
				340.351														-0.797546
				343.1						1.56266	0.247681	0.00428954
				344.204										1.62129
				346.199														4.72393
				347.396									0.523711
				348.056										0.23885
				349.087						1.28178	0.0833701	0.0772118
				350				0.071159	1.92385
				351.013						0.984951	0.271074	0.0621984
				351.105			3.36907
				353.767						0.134625		0.153351
				353.873										0.31354
				354.282										1.45888
				355.556														1.41104
				356.043										1.21495
				356.905						0.423329	0.642265	0.141019
				359.064														-1.16564
				360.234														-3.92638
				360.808										1.87244
				360.831						0.0462406	0.665675	0.0552279
				363.343										1.79118
				365.098										1.5608
				365.277										1.07963
				366.667				0.025876	2.22082
				368.45										1.527
				369.031										2.2115
				370.76														-4.66258
				370.76														-3.00614
				373.532										1.33059
				373.994						0.00585514	0.558952	0.0809651
				375.982										1.47974
				378.947														-5.03067
				378.947														-0.981595
				379.957										2.01523
				380.077						0.0137478	0.430942	0.0455764
				380.251										1.22232
				381.816										1.50699
				386.118										1.16147
				386.869									0.514007
				386.996										1.04628
				387.135														-4.84663
				388.721										0.897224
				389.508										1.02601
				390.207						-0.00250935	0.499179	0.0386059
				391.667				0.006469	2.60039
				393.383										1.83258
				396.491														-4.47853
				396.491														-3.00614
				397.661														-13.681
				398.641										1.16177
				399.334						0.0133403	0.554646	0.0230563
				400														-2.08589
				401.923										1.31773
				402.011										1.08053
				405.208				0.0097035	2.62187
				406.97										1.21619
				408.884			3.01328
				409.357														-7.97546
				410.526														-5.76687
				411.499						0.0211043	0.373331	0.00911528
				413.616										1.30446
				417.013										1.14867
				417.58						0.0209756	0.0831539	0.00268096
				421.053														-8.71166
				423.587			2.80343
				426.042					2.50565
				426.169										1.22344
				426.901														-7.97546
				428.729						0.0207396	0.115182	0.0477212
				428.969									0.413728
				430.366										1.16255
				436.226										1.12203
				439.766														-8.34356
				441.944										1.46103
				443.934						0.0284393	0.0276706	0.00214477
				445.653			2.79942
				450				0.006469	3.10008
				455.272										1.54268
				460.148						0.0200748	0.550311	0.00321716
				460.364			2.79675
				461.988														-11.2883
				463.65										1.46156
				467.708				0.006469	3.43008
				474.514										1.43471
				480.289									0.49104
				481.435						0.0276457	0.0233755	0.00107239
				482.943										1.21805
				483.041														-12.0245
				492.919										1.33351
				497.394									0.486834
				501.71						0.0432594	0.016509	0
				502.105										1.32695
				514.653										1.25949
				522.807														-0.797546
				523.014										1.22581
				525.019						0.0347448	0.0141425	0.00214477
				528.972									0.479071
				534.619										1.44974
				540.501										1.34822
				549.338						0.0181874		0.00482574
				550.029									0.563822
				554.694										1.34857
				562.246										1.2471
				562.513						0.0179086		0.00107239
				562.573														-9.07976
				568.445									0.469367
				573.931										1.25416
				582.298										1.20693
				583.797						0.0174582		0.00214477
				588.182									0.464514
				593.988										1.20044
				603.237										1.02446
				603.509														-7.60736
				606.607									0.549913
				608.124						0.0249648		0.00321716
				613.97										1.35002
				617.133									0.547325
