# Supplementary material for: Quantifying key drivers of marine pyrite burial flux and isotopic composition
Source: Research Square preprint supplement (doi:10.21203/rs.3.rs-4788953/v1), 2024-11-01
Supplement: Supplementary file 400 [file NAST1.xlsx]

## Sheet: Sheet1
reference	latitude_dd	longitude_dd	water_depth_m	depth_cm	age_yr	porosity_vol_	SO4_mM	H2S_mM	CH4_mM	S_py_wt_	S_AVS_wt_	S0_wt_	TOC_wt_	Fe_HR_wt_	Fe_tot_wt_	d34S_SO4	d34S_H2S	d34S_py	lnSRR_molL_1d_1	sed_rate_cmky
Boettcher2000c	20	65.5833	3186	0.638298									0.54067
				1.77305									0.461722
				2.76596									0.461722
				3.75887									0.411483
				4.53901									0.421053
				7.44681									0.447368
				10.4255									0.430622
				13.4752									0.330144
				16.383									0.370813
				19.4326									0.191388
				22.3404									0.169856
				25.3191									0.272727
				28.2979									0.241627
				-0.0232978												20.6029
				1.26661												20.4987
				3.30204												20.6025
				5.42385												20.5017
				14.3634												20.7049
				18.8917												20.8012
				29.1206												20.6957
				0.25			27.8
				0.75			27.1
				1.5			27.9
				2.5			27.9
				3.5			26.5
				4.5			27.5
				5.5			26.5
				6.5			27.8
				7.5			27.1
				8.5			27.6
				9.5
				11.5			23.8
				14.5			27.8
				17.5			27.4
				19
				20.5			27.8
				23.5			27.2
				26.5			26.6
				29
