# Supplementary material for: Quantifying key drivers of marine pyrite burial flux and isotopic composition
Source: Research Square preprint supplement (doi:10.21203/rs.3.rs-4788953/v1), 2024-11-01
Supplement: Supplementary file 403 [file ODP1002.xlsx]

## Sheet: Sheet1
reference	latitude_dd	longitude_dd	water_depth_m	depth_cm	age_yr	porosity_vol_	SO4_mM	H2S_mM	CH4_mM	S_py_wt_	S_AVS_wt_	S0_wt_	TOC_wt_	Fe_HR_wt_	Fe_tot_wt_	d34S_SO4	d34S_H2S	d34S_py	lnSRR_molL_1d_1	sed_rate_cmky
Donahue2008	10.7247	-65.2005	900	0.779221			27.8652
				3.8961			27.4438
				9.35065			27.7809
				14.026			27.2753
				18.7013			25.6742
				24.9351			26.5169
				28.0519			25.7584
				32.7273			25.5899
				38.1818			24.8315
				44.4156			25.6742
				54.5455			23.9888
				62.3377			23.4831
				74.026			23.2303
				84.9351			22.3034
				93.5065			21.1236
				104.416			20.0281
				115.325			21.2079
				124.675			19.6067
				134.026			18.764
				145.714			18.5112
				155.065			17.5843
				169.87			17.6685
				184.675			16.9101
				200.26			15.7303
				215.844			15.5618
				229.87			14.8876
				244.675			13.6236
				261.039			13.3708
				274.286			12.1067
				291.429			12.0225
				300			11.5169
				320.26			10.927
				339.74			10
				360.779			10.2528
				380.26			8.82023
				399.74			8.56742
				3.87733				0.0799972
				8.37686				2.14937
				19.2404				2.28298
				23.9295				1.91205
				34.1564				0.241891
				38.6435				2.47041
				45.8193				0.0837965
				52.4099				5.23028
				62.6369				3.56012
				73.4304				4.59558
				81.0697				6.24084
				91.206				5.73778
				103.72				4.62485
				112.165				5.89883
				122.19				6.82812
				133.846				6.7496
				143.375				4.07141
				154.193				4.78857
				167.982				7.25667
				183.496				7.52332
				199.116				6.41068
				213.672				9.01147
				229.457				5.77682
				242.568				6.97165
				258.191				5.83248
				287.708				5.80863
				299.572				3.05108
				318.568				8.49047
				338.259				4.9644
				358.396				5.70893
				378.66				4.80891
				398.803				5.47386
				-1.06642												22.4342
				7.46914												23.5072
				18.3324												24.8483
				26.8679												25.9214
				37.7249												26.4517
				54.0208												28.5985
				74.1885												30.2011
				94.3563												31.8037
				116.076												33.6751
				134.685												34.1981
				156.401												35.529
				183.535												35.7737
				214.562												38.1769
				245.589												40.5801
				275.065												42.9848
				300.659												44.5823
				339.442												47.5187
				380.536												48.5611
				8.61308													-28.9263
				20.2473													-28.1265
				38.8521													-28.144
				53.5662													-30.0497
				75.2969													-26.827
				95.4478													-27.3865
				114.834													-26.594
				135.004													-24.7211
				155.186													-21.2266
				185.411													-22.3361
				214.099													-21.5524
				243.527													-25.3639
				339.606													-31.4004
				377.729													-13.5984
				7.5		0.849
				22.5		0.786
				37.5		0.793
				52.5		0.737
				67.5		0.607
				78.4		0.552
				91.2		0.71
				105.9		0.651
				120.5		0.627
				135.2		0.64
				149.8		0.664
				164.5		0.625
				174		0.656
				186.3		0.629
				200.5		0.652
				214.9		0.651
				229.6		0.704
				244		0.641
				258.7		0.618
				268.1		0.614
				281.2		0.591
				295.8		0.599
				310.7		0.599
				326		0.59
				341.4		0.635
				0						1.93
				5						1.87								-32.6
				10						1.66					2.78			-33.2
				15						1.87					2.73			-31.9
				20						1.98								-33.8
				25						1.81					2.7			-33.3
				30						2.44					2.82			-32.7
				35						2.06								-32.9
				40						1.84								-32.7
				45						1.78					2.89
				55						2.14					2.83			-32.3
				65						2.08
				75						2.23								-32.9
				85						1.86					3.07
				95						2.45								-31.3
				105						2.13								-31.7
				115						2.09					3.16
				125						2.2					2.77			-33.2
				135						2.4
				145						2.21								-33.8
				155						2.33					3.15
				170						2.44								-32.8
				185						2.24
				200						2.26
				215						2.2					3.13
				230						2.08								-33.8
				245						2.28
				260						2.41					3.24
				275						2.31								-17.5
				290						2.16					3.37
				300						2.17								-30.5
				320						2.08
				340						2.07					3.4
				360						2.11
				380						1.89					3.1			-27.8
				400						1.58
				420						1.67
				138						1.37
				440						1.46					1.97			-27.4
				445						1.32								-26.2
				450						1.46					1.91
				470						1.72					2.04
				490						1.76					2.35			-28.2
				510						1.74					2.56
				530						1.64					2.83
				550						2.36					2.62
				570						2.15					3.24			-26.5
				590						2.09					2.82			-28.4
				600						2.51					3.63			-25.5
				610						1.76					4.33			-26.1
				615						2.23								-27.4
				620						2.38					3.5			-28.3
				625						2.46
				635						2.59					3.9
				640						2.86								-27.9
				648.75						3.24					3.93			-28.7
				651.25						2.57					4.87			-30.5
				660						2.56					3.65			-29.1
				665						2.36								-27.4
				670						2.41					3.7			-24.5
				675						2.55								-23
				680						2.6
				685						2.94					3.95			-12.2
				705						2.79								-12.8
				710						3.05					4.7			-13
				715						2.5								-8.8
				725						0.52					4.9			-7.8
				730						0.12					4.82			-27.2
				740						0.11					4.98			-13.4
				745						0.19
				755						0.06								-23
				760											5.18
				770						0.18								3.9
				775						0.29								19.1
				780						0.48								-8.3
				785											4.16
