# Supplementary material for: Quantifying key drivers of marine pyrite burial flux and isotopic composition
Source: Research Square preprint supplement (doi:10.21203/rs.3.rs-4788953/v1), 2024-11-01
Supplement: Supplementary file 406 [file ODP1052.xlsx]

## Sheet: Sheet1
reference	latitude_dd	longitude_dd	water_depth_m	depth_cm	age_yr	porosity_vol_	SO4_mM	H2S_mM	CH4_mM	S_py_wt_	S_AVS_wt_	S0_wt_	TOC_wt_	Fe_HR_wt_	Fe_tot_wt_	d34S_SO4	d34S_H2S	d34S_py	lnSRR_molL_1d_1	sed_rate_cmky
Antler2013	29.9869	-76.592	1345	795		0.612	28.5						0.03			21.3646
				1765			28.5						0.05			21.1249
				2715			28.8						0.09			20.8785
				3665			27.8						0			20.8885
				4615			27						0			21.1598
				5565			26.9						0			21.1798
				8415			26.7						0			21.3554
				11265			26.1									22.0438
				13265			27.3									22.3551
				15015			26.4									25.5412
				14733			25.4									28.8156
				20685			20.4									29.5938
