# Supplementary material for: Quantifying key drivers of marine pyrite burial flux and isotopic composition
Source: Research Square preprint supplement (doi:10.21203/rs.3.rs-4788953/v1), 2024-11-01
Supplement: Supplementary file 409 [file ODP1119.xlsx]

## Sheet: Sheet1
reference	latitude_dd	longitude_dd	water_depth_m	depth_cm	age_yr	porosity_vol_	SO4_mM	H2S_mM	CH4_mM	S_py_wt_	S_AVS_wt_	S0_wt_	TOC_wt_	Fe_HR_wt_	Fe_tot_wt_	d34S_SO4	d34S_H2S	d34S_py	lnSRR_molL_1d_1	sed_rate_cmky
Boettcher20002	-44.7525	172.36	396	2.95			28.6
				10.6			39.8
				20.15			0
				29.65			0
				39.05			0
				48.65			0.2
				58.05			0
				67.6			0
				77.05			0
				86.6			0
				96.1			0
				124.7			0
				153.1			0
				156.7			0
				184.2			0
				213.1			0.3
				241.9			0
				270.7			0
				299.7			0
				328.2			1.1
				357			0.9
				381.5			2.4
				414.9			1.4
				433.8			0.8
				472.3			1.6
