# Supplementary material for: Quantifying key drivers of marine pyrite burial flux and isotopic composition
Source: Research Square preprint supplement (doi:10.21203/rs.3.rs-4788953/v1), 2024-11-01
Supplement: Supplementary file 418 [file ODP1122.xlsx]

## Sheet: Sheet1
reference	latitude_dd	longitude_dd	water_depth_m	depth_cm	age_yr	porosity_vol_	SO4_mM	H2S_mM	CH4_mM	S_py_wt_	S_AVS_wt_	S0_wt_	TOC_wt_	Fe_HR_wt_	Fe_tot_wt_	d34S_SO4	d34S_H2S	d34S_py	lnSRR_molL_1d_1	sed_rate_cmky
Boettcher20002	-46.7359	-177.278	4432	5.9			3.3
				15.2			0
				24.7			0
				34.2			0
				45.1			0
				53.2			0
				62.7			0
				67.4			0
				76.9			0
				92.8			0
				96.4			2.5
				100.8			0
				107.6			1.6
				117.2			1.1
				122			0
