# Supplementary material for: Quantifying key drivers of marine pyrite burial flux and isotopic composition
Source: Research Square preprint supplement (doi:10.21203/rs.3.rs-4788953/v1), 2024-11-01
Supplement: Supplementary file 421 [file ODP1123.xlsx]

## Sheet: Sheet1
reference	latitude_dd	longitude_dd	water_depth_m	depth_cm	age_yr	porosity_vol_	SO4_mM	H2S_mM	CH4_mM	S_py_wt_	S_AVS_wt_	S0_wt_	TOC_wt_	Fe_HR_wt_	Fe_tot_wt_	d34S_SO4	d34S_H2S	d34S_py	lnSRR_molL_1d_1	sed_rate_cmky
Boettcher20002	-41.964	-171.241	3290	1.4			27.9
				4.35			27.2
				7.5			26.6
				10.5			26.1
				13.5			25.4
				17			24.5
				20			23.3
				22.8			22.9
				26.5			22.4
				29.5			22.4
				32.5			22.9
				36			23.7
				39			21.5
				42			21.2
				45.5			20.2
				48.5			20.6
				51.5			20.2
				59.5			19.6
				69			18.1
				78.5			17.7
				88			16.5
				97.5			16.1
				107			15.4
				116.5			15
				126			14.4
				135.5			14.5
				145			13.9
				154.5			13.5
				151.8			13.8
				178.2			13.5
				205.6			12.4
				232.9			12.8
				264.7			12.7
				293.6			12.9
				322.4			13
				351			12.1
				380			11.9
				407.35			13.9
				434.65			11.9
				466.25			11.2
				483.65			11.9
				494.4			11.9
				532.9			11.4
				552.1			12.1
				581			11.1
				609.8			11.7
				624.4
