# Supplementary material for: Quantifying key drivers of marine pyrite burial flux and isotopic composition
Source: Research Square preprint supplement (doi:10.21203/rs.3.rs-4788953/v1), 2024-11-01
Supplement: Supplementary file 424 [file ODP1124.xlsx]

## Sheet: Sheet1
reference	latitude_dd	longitude_dd	water_depth_m	depth_cm	age_yr	porosity_vol_	SO4_mM	H2S_mM	CH4_mM	S_py_wt_	S_AVS_wt_	S0_wt_	TOC_wt_	Fe_HR_wt_	Fe_tot_wt_	d34S_SO4	d34S_H2S	d34S_py	lnSRR_molL_1d_1	sed_rate_cmky
Boettcher2004	-39.7336	-176.765	3978	3.06122			27.3984
				9.18367			26.748
				22.449			25.1626
				31.6327			24.7967
				40.8163			24.3496
				51.0204			24.3902
				60.2041			23.9431
				68.3674			23.5366
				78.5714			23.6179
				84.6939			24.3902
				96.9388			24.7967
				111.224			24.6748
				138.776			24.9187
				166.327			25.3252
				194.898			22.6829
				224.49			22.3171
				251.02			21.5854
				300			21.1382
				331.633			21.5041
				360.204			19.9187
				388.776			19.5935
				416.327			17.8862
				443.878			19.6341
				474.49			19.0244
				3.06122												22.9268
				8.16327												25.2033
				21.4286												28.0081
				40.8163												29.2276
				50												29.065
				59.1837												28.8618
				70.4082												29.3089
