# Supplementary material for: Quantifying key drivers of marine pyrite burial flux and isotopic composition
Source: Research Square preprint supplement (doi:10.21203/rs.3.rs-4788953/v1), 2024-11-01
Supplement: Supplementary file 427 [file ODP1125.xlsx]

## Sheet: Sheet1
reference	latitude_dd	longitude_dd	water_depth_m	depth_cm	age_yr	porosity_vol_	SO4_mM	H2S_mM	CH4_mM	S_py_wt_	S_AVS_wt_	S0_wt_	TOC_wt_	Fe_HR_wt_	Fe_tot_wt_	d34S_SO4	d34S_H2S	d34S_py	lnSRR_molL_1d_1	sed_rate_cmky
Boettcher2004	-42.5182	-177.793	1350	2.03252			26.1711
				17.2764			21.9959
				31.5041			18.0244
				48.7805			15.9878
				64.0244			13.3401
				79.2683			10.387
				92.4797			8.35031
				112.805			5.39715
				125			3.46232
				142.276			2.34216
				161.585			1.222
				161.585			0.305499
				176.829			0.203666
				196.138			0.203666
				209.35			0.203666
				223.577			0.203666
				237.805			0.101833
				256.098			0.305499
				273.374			0.407332
				290.65			0.305499
				305.894			0.305499
				320.122			0.305499
				335.366			0.305499
				349.594			0.305499
				365.854			0.305499
				386.179			0.712831
				408.537			0.916497
				433.943			0.101833
				454.268			0.916497
				1.01626												23.2179
				16.2602												27.1894
				30.4878												30.9572
				46.748												32.7902
				63.0081												34.8269
				78.252												37.4745
				91.4634												39.8167
