# Supplementary material for: Quantifying key drivers of marine pyrite burial flux and isotopic composition
Source: Research Square preprint supplement (doi:10.21203/rs.3.rs-4788953/v1), 2024-11-01
Supplement: Supplementary file 430 [file ODP1229.xlsx]

## Sheet: Sheet1
reference	latitude_dd	longitude_dd	water_depth_m	depth_cm	age_yr	porosity_vol_	SO4_mM	H2S_mM	CH4_mM	S_py_wt_	S_AVS_wt_	S0_wt_	TOC_wt_	Fe_HR_wt_	Fe_tot_wt_	d34S_SO4	d34S_H2S	d34S_py	lnSRR_molL_1d_1	lnMOR_molL_1d_1	sed_rate_cmky
Meister2019	-11.0148	-77.8731	150	0			20.9574
				35.3982			18.5106
				70.7965			19.3617
				106.195			16.7021
				113.677					0.0318302
				125.193									2.13986
				150.939									7.5156
				176.991			15.5319
				180.834									5.75758
				181.932									5.98688
				205														-31.76
				255.773					0.0488064
				315.423									1.8592
				316.643									2.11398
				318.584			14.0426
				340														-19.59
				406.328									4.8399
				454.707					0.0572944
				495.575			15
				596.803					0.0657825
				600														-17.84
				628.771									3.28529
				638.899									5.39992
				672.566			15.8511
				682.06					0.0742706
				814.159			15.3191
				900.267									3.97262
				994.671					0.0318302
				1048.03									2.82581
				1132.74			14.6809
				1222.02					0.0742706
				1238.94			13.617
				1238.94			13.1915
				1345.13			11.9149
				1584.07									2.74824
				1597.74									5.60171
				1628.32			12.3404
				1628.32			9.78723
				1648.31					0.0827586
				1659														-21.31
				1699.12			8.61702
				1700.35									3.02825
				1818.83					0.0657825
				1911.5			7.34043
				1932.5					0.0742706
				1968.07									2.92577
				1982.3			8.61702
				2013.34									4.3779
				2049.82									3.99566
				2075														-10.72
				2103.02					0.0912467
				2188.28					0.227056
				2230.09			5.74468
				2336.28			4.14894
				2358.79					0.0318302
				2430.16									3.40887
				2511.67									4.4278
				2513.27			3.61702
				2558.16									6.13471
				2654.87			2.23404
				2927.18					0.29496
				2973.45			0.851064
				2985.6									7.38221
				3059														-4.65
				3079														-7.17
				3126.11					0.235544
				3157.64									3.30541
				3230														-11.78
				3260														-6.34
				3495.56					0.286472
				3497.72									2.31106
				3580.82					0.125199
				3624.49									4.78213
				3751.33					0.625995
				3767.62									2.66718
				3836.59					0.235544
				3836.59					0.201592
				3858.41			0.106383
				3950.27					38.0851
				3978.69					0.829708
				3990														-22.4
				3996.41									2.4374
				4076.34									3.12513
				4092.36					0.532626
				4149.2					0.676923
				4149.2					0.269496
				4150.16									2.53898
				4177.62					0.447745
				4229														-26.41
				4262.88					0.396817
				4305.49									2.97177
				4319.72					1.27958
				4524.52									0.703794
				5013														-20.49
				5035.17									3.32692
				5137.3									0.651541
				5424														-29.14
				5522.12			0.106383
				5561.69									1.26211
				5599.4									1.13464
				5675.41									1.00709
				5986.44									1.94911
				6061.36									1.59226
				6081.7					1.1947
				6085														-19.59
				6103.34									2.3565
				6105.78									2.86605
				6110.12					1.23714
				6288.69									1.05675
				6309.06					1.31353
				6535														-22.91
				6535														-13.56
				6548.67			0
				6633.27									1.00506
				6650.09					1.6191
				6748.95									1.15768
				6820.6					0.651459
				6973.45			2.44681
				6991.12					2.62918
				7104.8					1.44934
				7132.09									1.15687
				7185.84			0.319149
				7284.01									0.876294
				7332.15					0.685411
				7400.17									1.13083
				7417.41					1.16923
				7475														-21.43
				7476.31									1.02875
				7552.33									0.901204
				7554.65									1.38528
				7587.92					1.27958
				7644.76					0.753316
				7668.74									1.20669
				7681.42			0.851064
				8014.21					0.727851
				8031.75									5.0021
				8140														-12.42
				8249.56									2.47935
				8269.98					0.617507
				8412.08					0.51565
				8425														-18.15
				8484.32									3.49796
				8582.59					0.0742706
				8611.01					0.142175
				8659														-18.48
				8743.36			0.425532
				8867.22									3.44619
				9065.72					0.0488064
