# Supplementary material for: Quantifying key drivers of marine pyrite burial flux and isotopic composition
Source: Research Square preprint supplement (doi:10.21203/rs.3.rs-4788953/v1), 2024-11-01
Supplement: Supplementary file 433 [file ODP807.xlsx]

## Sheet: Sheet1
reference	latitude_dd	longitude_dd	water_depth_m	depth_cm	age_yr	porosity_vol_	SO4_mM	H2S_mM	CH4_mM	S_py_wt_	S_AVS_wt_	S0_wt_	TOC_wt_	Fe_HR_wt_	Fe_tot_wt_	d34S_SO4	d34S_H2S	d34S_py	lnSRR_molL_1d_1	sed_rate_cmky
Antler2013	3.60667	156.625	2805	445		0.691	27.4						0.02			19.6841
				1335			27.4									19.8248
				2285			27.5									21.5153
				3235			26.7									21.6576
				4185			26.4									23.0933
				5135			26.1									22.9777
				7985			26									25.6478
				10835			25									26.5941
				13710			23.6									27.6695
				16535			22.9									28.3578
				19385			22.6									28.4028
				22235			22.2									28.2313
				25085			22.5									27.5005
				27970			22									27.0261
				30670			21.8									27.8434
				33530			21.6									28.7965
