# Supplementary material for: Quantifying key drivers of marine pyrite burial flux and isotopic composition
Source: Research Square preprint supplement (doi:10.21203/rs.3.rs-4788953/v1), 2024-11-01
Supplement: Supplementary file 439 [file ODP995.xlsx]

## Sheet: Sheet1
reference	latitude_dd	longitude_dd	water_depth_m	depth_cm	age_yr	porosity_vol_	SO4_mM	H2S_mM	CH4_mM	S_py_wt_	S_AVS_wt_	S0_wt_	TOC_wt_	Fe_HR_wt_	Fe_tot_wt_	d34S_SO4	d34S_H2S	d34S_py	lnSRR_molL_1d_1	sed_rate_cmky
Borowski2013	31.8035	-75.5224	2789.8	0.38
				0.85
				1.5
				2.9			27									22.5
				4.08			23.6									26.2
				5.9			21.7
				7.4			19.9									29.7
				12.7			11.2
				14.25			9.2
				14.25
				17.4			6									44.5
				18.9			3									48.1
				20.4			1.6									51.6
				20.6
				20.65
				20.65
				20.8
				21.22												26.2
				21.22
				21.42
				21.42
				21.72												19.2
				21.9			0
				23.4			0
				23.4
				23.4
				24.9			0.5
				25.15			0
				26.65			0
				28.15			0
				37.65			0
