# Supplementary material for: Quantifying key drivers of marine pyrite burial flux and isotopic composition
Source: Research Square preprint supplement (doi:10.21203/rs.3.rs-4788953/v1), 2024-11-01
Supplement: Supplementary file 442 [file OST-2_Low.xlsx]

## Sheet: Sheet1
reference	latitude_dd	longitude_dd	water_depth_m	depth_cm	age_yr	porosity_vol_	SO4_mM	H2S_mM	CH4_mM	S_py_wt_	S_AVS_wt_	S0_wt_	TOC_wt_	Fe_HR_wt_	Fe_tot_wt_	d34S_SO4	d34S_H2S	d34S_py	lnSRR_molL_1d_1	sed_rate_cmky
Aller2010	3.34894	-49.8104		16.0194			30
				24.0291			27.5121
				44.4175			26.6626
				64.0777			26.1772
				85.1942			24.3568
				104.854			23.2039
				125.243			20.2913
				144.903			17.7427
				164.563			14.3447
				184.951			11.3107
