# Supplementary material for: Quantifying key drivers of marine pyrite burial flux and isotopic composition
Source: Research Square preprint supplement (doi:10.21203/rs.3.rs-4788953/v1), 2024-11-01
Supplement: Supplementary file 445 [file OST-2_Rising.xlsx]

## Sheet: Sheet1
reference	latitude_dd	longitude_dd	water_depth_m	depth_cm	age_yr	porosity_vol_	SO4_mM	H2S_mM	CH4_mM	S_py_wt_	S_AVS_wt_	S0_wt_	TOC_wt_	Fe_HR_wt_	Fe_tot_wt_	d34S_SO4	d34S_H2S	d34S_py	lnSRR_molL_1d_1	sed_rate_cmky
Aller2010	3.34894	-49.8104		7.29927			27.3908
				16.7883			28.6044
				27.7372			28.9684
				37.2263			28.483
				57.6642			27.8762
				77.3723			28.1796
				108.029			27.0874
				137.956			24.8422
				167.883			21.6262
				197.81			11.3107
				227.737			12.6456
				258.394			9.42961
