# Supplementary material for: Quantifying key drivers of marine pyrite burial flux and isotopic composition
Source: Research Square preprint supplement (doi:10.21203/rs.3.rs-4788953/v1), 2024-11-01
Supplement: Supplementary file 451 [file PB1.xlsx]

## Sheet: Sheet1
reference	latitude_dd	longitude_dd	water_depth_m	depth_cm	age_yr	porosity_vol_	SO4_mM	H2S_mM	CH4_mM	S_py_wt_	S_AVS_wt_	S0_wt_	TOC_wt_	Fe_HR_wt_	Fe_tot_wt_	d34S_SO4	d34S_H2S	d34S_py	lnSRR_molL_1d_1	sed_rate_cmky
Ku2008	13.8711	-60.8962	0.6	0.833333						0.0333333
				8.75						0.0833333
				17.9167						0.283333
				27.5						0.0666667
				37.5						0.1
				47.0833						0.9
				57.9167						0.116667
				10.2308									0.635667
				18.4904									3.04315
				29.3764									0.426162
				39.1837									0.300625
				48.3742									2.74954
				58.5044									1.08764
