# Supplementary material for: Quantifying key drivers of marine pyrite burial flux and isotopic composition
Source: Research Square preprint supplement (doi:10.21203/rs.3.rs-4788953/v1), 2024-11-01
Supplement: Supplementary file 454 [file PB3.xlsx]

## Sheet: Sheet1
reference	latitude_dd	longitude_dd	water_depth_m	depth_cm	age_yr	porosity_vol_	SO4_mM	H2S_mM	CH4_mM	S_py_wt_	S_AVS_wt_	S0_wt_	TOC_wt_	Fe_HR_wt_	Fe_tot_wt_	d34S_SO4	d34S_H2S	d34S_py	lnSRR_molL_1d_1	ExtraVar1	sed_rate_cmky
Ku2008	13.8713	-60.896	0.6	10						0.85
				20						0.883333
				29.5833						0.95
				44.1667						0.833333
				54.1667						1.03333
				8.36775									0.573567
				10.2074									1.03705
				20.9137									1.49966
				30.279									0.952024
				45.2088									1.01283
				54.9753									1.58626
