# Supplementary material for: Quantifying key drivers of marine pyrite burial flux and isotopic composition
Source: Research Square preprint supplement (doi:10.21203/rs.3.rs-4788953/v1), 2024-11-01
Supplement: Supplementary file 457 [file PB4.xlsx]

## Sheet: Sheet1
reference	latitude_dd	longitude_dd	water_depth_m	depth_cm	age_yr	porosity_vol_	SO4_mM	H2S_mM	CH4_mM	S_py_wt_	S_AVS_wt_	S0_wt_	TOC_wt_	Fe_HR_wt_	Fe_tot_wt_	d34S_SO4	d34S_H2S	d34S_py	lnSRR_molL_1d_1	sed_rate_cmky
Ku2008	13.8754	-60.8917	2.4	1.9635						0.0581293
				8.41183						0.0774426
				22.3962						1.32997
				37.1838						0.155832
				57.8731						0.652487
				0.496454														-23.4615
				5.95745														-23.4615
				22.3404														-18.8462
				37.7305														-28.9423
				57.5887														-29.2091
				1.36364									1.09271
				7.72727									1.27152
				13.1818									1.30463
				17.9545									1.61589
				22.9545									3.13907
				27.2727									1.62914
				32.7273									2.15894
				38.1818									0.735098
				43.1818									0.754966
				58.8636									0.953641
