# Supplementary material for: Quantifying key drivers of marine pyrite burial flux and isotopic composition
Source: Research Square preprint supplement (doi:10.21203/rs.3.rs-4788953/v1), 2024-11-01
Supplement: Supplementary file 460 [file PB5.xlsx]

## Sheet: Sheet1
reference	latitude_dd	longitude_dd	water_depth_m	depth_cm	age_yr	porosity_vol_	SO4_mM	H2S_mM	CH4_mM	S_py_wt_	S_AVS_wt_	S0_wt_	TOC_wt_	Fe_HR_wt_	Fe_tot_wt_	d34S_SO4	d34S_H2S	d34S_py	lnSRR_molL_1d_1	sed_rate_cmky
Ku2008	13.8726	-60.8915	2.1	2.43764						0.125726
				7.87632						0.195216
				27.199						0.320563
				42.0647						0.410502
				62.8879						0.502714
				1.444														-30.8238
				7.09695														-28.8417
				17.5031														-30.6937
				27.3294														-34.2875
				37.2159														-29.2091
				0.909091									1.17881
				8.18182									1.31126
				13.1818									1.10596
				16.8182									1.10596
				22.5									0.920529
				28.1818									1.19205
				32.7273									0.748343
				43.4091									0.953641
				53.6364									0.735098
