# Supplementary material for: Quantifying key drivers of marine pyrite burial flux and isotopic composition
Source: Research Square preprint supplement (doi:10.21203/rs.3.rs-4788953/v1), 2024-11-01
Supplement: Supplementary file 463 [file PB6.xlsx]

## Sheet: Sheet1
reference	latitude_dd	longitude_dd	water_depth_m	depth_cm	age_yr	porosity_vol_	SO4_mM	H2S_mM	CH4_mM	S_py_wt_	S_AVS_wt_	S0_wt_	TOC_wt_	Fe_HR_wt_	Fe_tot_wt_	d34S_SO4	d34S_H2S	d34S_py	lnSRR_molL_1d_1	sed_rate_cmky
Ku2008	13.8713	-60.8951	0.8	1.66667						0.0666667
				7.91667						0.1
				22.5						0.583333
				37.0833						0.283333
				57.5						0.633333
				0.702823														-14.7069
				6.89011														-25.4206
				22.0516														-28.9817
				37.2984														-26.4856
				56.6971														-29.2091
				1.63496
				5.10147									0.56697
				8.3734									0.476681
				18.6337									0.586393
				23.3351
				38.0057									0.494513
				48.0302									0.645771
				57.5784									0.963166
