# Supplementary material for: Quantifying key drivers of marine pyrite burial flux and isotopic composition
Source: Research Square preprint supplement (doi:10.21203/rs.3.rs-4788953/v1), 2024-11-01
Supplement: Supplementary file 469 [file Profiles_Additional_Info.xlsx]

## Sheet: Sheet1
Core	Lat	Long	SteadyState	CH4	z0 (depth at which SO4 consumtion starts)	Comment	Sed.rate [cm/ky]	min	max	Source	Based on	Porosity [%]	min	max	Source	Good OC Profiles	OC(0) wt%	min	max	Source	bottom Seawater T [°C]	Source	Water depth [m]	Source	C14 age (ka)	Source	Method
Aharon2003 GC-185_2646-3.csv	27.7667	-91.5		1	3	Mexico Margin Gas hydrates	6			Aharon2003						1	0.73			Lin&Morse1991	6.9	Aharon2003	590	Aharon2003	0.27	Chapman2018
Aharon2003 GC-185_2647-1.csv	27.7667	-91.5		1	0	Mexico Margin Gas hydrates	6			Aharon2003							0.73			Lin&Morse1991	6.9	Aharon2003	590	Aharon2003	0.27	Chapman2018
Aharon2003 GC-185_2647-2.csv	27.7667	-91.5		1	2	Mexico Margin Gas hydrates	6			Aharon2003						1	0.73			Lin&Morse1991	6.9	Aharon2003	590	Aharon2003	0.27	Chapman2018
Aharon2003 GC-185_2647-3.csv	27.7667	-91.5		1	0	Mexico Margin Gas hydrates	6			Aharon2003						1	0.73			Lin&Morse1991	6.9	Aharon2003	590	Aharon2003	0.27	Chapman2018
Aharon2003 GC-185_2647-4.csv	27.7667	-91.5		1	6	Mexico Margin Gas hydrates	6			Aharon2003						1	0.73			Lin&Morse1991	6.9	Aharon2003	590	Aharon2003	0.27	Chapman2018
Aharon2003 GC-232_2635-1.csv	27.7333	-91.3		1	0	Mexico Margin Gas hydrates	6			Aharon2003						1	0.73			Lin&Morse1991	6.6	Aharon2003	630	Aharon2003	0.27	Chapman2018
Aharon2003 GC-232_2635-2.csv	27.7333	-91.3		1	0	Mexico Margin Gas hydrates	6			Aharon2003						1	0.73			Lin&Morse1991	6.6	Aharon2003	630	Aharon2003	0.27	Chapman2018
Aharon2003 GC-232_2635-3.csv	27.7333	-91.3		1	0.5	Mexico Margin Gas hydrates	6			Aharon2003						1	0.73			Lin&Morse1991	6.6	Aharon2003	630	Aharon2003	0.27	Chapman2018
Aharon2003 GC-232_2639-2.csv	27.7333	-91.3		1	0	Mexico Margin Gas hydrates	6			Aharon2003						1	0.73			Lin&Morse1991	6.6	Aharon2003	630	Aharon2003	0.27	Chapman2018
Aharon2003 GC-232_2639-3.csv	27.7333	-91.3		1	0	Mexico Margin Gas hydrates	6			Aharon2003							0.73			Lin&Morse1991	6.6	Aharon2003	630	Aharon2003	0.27	Chapman2018
Aharon2003 GC-232_2639-4.csv	27.7333	-91.3			5	Mexico Margin Gas hydrates	6			Aharon2003						1	0.73			Lin&Morse1991	6.6	Aharon2003	630	Aharon2003	0.27	Chapman2018
Aharon2003 GC-232_2643-2.csv	27.7333	-91.3			0	Mexico Margin Gas hydrates	6			Aharon2003						1	0.73			Lin&Morse1991	6.6	Aharon2003	630	Aharon2003	0.27	Chapman2018
Aharon2003 GC-232_2643-3.csv	27.7333	-91.3			5	Mexico Margin Gas hydrates	6			Aharon2003						1	0.73			Lin&Morse1991	6.6	Aharon2003	630	Aharon2003	0.27	Chapman2018
Aller2010 GS_4221.csv	3.78637	-50.646			30		2550	100	5000	Kuehl1986											26	Aller2010			2.65	Kuehl1986
Aller2010 KS00-16.csv	5.4352	-52.5576			0		740			Allison&Tee2004											26	Aller2010			0.048	Marchand2017
Aller2010 KS00-17.csv	5.52796	-52.8356			0		740			Allison&Tee2004											26	Aller2010			0.048	Marchand2017
Aller2010 OST-2_Low.csv	3.34894	-49.8104			16.0194		7500	5000	10000	Kuehl1986											26	Aller2010			2.65	Kuehl1986
Aller2010 OST-2_Rising.csv	3.34894	-49.8104			108.029		7500	5000	10000	Kuehl1986											26	Aller2010			2.65	Kuehl1986
Aller2010 RMT-2.csv	2.31417	-48.8548			116.424		2000			Kuehl1986											26	Aller2010			2.65	Kuehl1986
Aller2010 SJ96-22.csv	4.2226	-51.0538			68.5665		100			Kuehl1986											26	Aller2010			2.65	Kuehl1986
Antler2013 BA1.csv	33.1299	34.9027			3.87318							80			Keller & Lambert 1975			0.5	1	Antler2013
Antler2013 HU.csv	32.8978	34.9132			30.5981							80			Keller & Lambert 1976			0.5	1	Antler2013
Antler2013 ODP1052.csv	29.9869	-76.592			0		2.7	2.6	2.8	Norris1998		61			ODP initial reports		0.9			Antler2013
Antler2013 ODP807.csv	3.60667	156.625			0		2.9			Risig1993		69.1			ODP initial reports			0.02	0.6	Antler2013
Antler2013 P130.csv	32.8978	34.9132			0							80			Keller & Lambert 1974					Antler2013
Antler2013 Y1.csv	32.1021	34.8094			0							80			Keller & Lambert 1975		2.5			Antler2013
Antler2013 Y2.csv	32.1021	34.8094			0							80			Keller & Lambert 1976		2.5			Antler2013
Boening2004 14MC.csv	-11.0303	-78.0805			0		100			Boening2004													654		2.1	Reimers&Suess1983PeruOM	Interpolated
Boening2004 18MC.csv	-10.0547	-78.285			0		200			Boening2004						1							255		1.325	Reimers&Suess1983PeruOM	Interpolated
Boening2004 29MC.csv	-9.74267	-79.737			0		300			Boening2004						1							102		0.57	Reimers&Suess1983PeruOM	Interpolated
Beoning2004 33MC.csv	-11.1333	-78.3555			0		100			Boening2004						1							1357		2.1	Reimers&Suess1983PeruOM	Interpolated
Boening2004 45MC.csv	-9.69117	-78.6832			0		180			Boening2004													153		0.57	Reimers&Suess1983PeruOM	Interpolated
Boettcher1998 963.csv	37.0323	13.1816			0		15			Boettcher1998		65			Keller & Lambert 1974
Boettcher1998 964.csv	36.2604	17.7498			0		3			Boettcher1998		65			Keller & Lambert 1975
Boettcher1998 965.csv	33.918	32.7131			0		0.8025	0.005	1.6	Emeis1996		65			Keller & Lambert 1976
Boettcher1998 966.csv	33.7966	32.7015			0		15			Boettcher1998		75			Keller & Lambert 1977
Boettcher1998 967.csv	34.0683	32.7254	0		0		3.14	0.53	5.75	Emeis1996		75			Keller & Lambert 1978
Boettcher1998 968.csv	34.3317	32.7511			0		7			Boettcher1998		75			Keller & Lambert 1979
Boettcher1998 969.csv	33.84	24.8844	0		0		1.95	0.6	3.3	Emeis1996		65			Keller & Lambert 1980
Boettcher1998 970.csv	33.7366	24.802			0							65			Keller & Lambert 1981
Boettcher1998 970B.csv	33.7369	24.8116	0		0							65			Keller & Lambert 1982
Boettcher1998 970C.csv	33.7356	24.7909			0							65			Keller & Lambert 1983
Boettcher1998 970D.csv	33.734	24.7769			0							65			Keller & Lambert 1984
Boettcher1998 971A.csv	33.7032	24.7136	0		0							65			Keller & Lambert 1985
Boettcher1998 971B.csv	33.7136	24.7018			0							65			Keller & Lambert 1986
Boettcher1998 971C.csv	33.7136	24.7018	0		0							65			Keller & Lambert 1987
Boettcher1998 971D.csv	33.724	24.6879	0		0							65			Keller & Lambert 1988
Boettcher1998 972.csv	35.7799	18.7252			0							65			Keller & Lambert 1989
Boettcher1998 973.csv	35.7803	18.9481			0							65			Keller & Lambert 1990
Boettcher1998b BAS3.csv	7.37776	53.0117	0		0
Boettcher1998b RP47.csv	7.753	53.012			0
Boettcher1998b RP63.csv	7.76211	53.7224			0
Boettcher1999 974.csv	40.3561	12.1418			10.95		5			Boettcher1998
Boettcher1999 975.csv	38.8966	4.50978			1.45		7			Boettcher1998
Boettcher1999 976.csv	36.2052	-4.31333			1.28		20			Boettcher1998
Boettcher1999 977.csv	36.0318	-1.95532			0		15			Boettcher1998
Boettcher1999 978.csv	36.2311	-2.05707	0		0
Boettcher1999 979.csv	35.7238	-3.20588			0		20			Boettcher1998
Boettcher2000 B2000_LD.csv	19.1467	58.3267			0		31	10	52	Boettcher200
Boettcher20002 ODP1119.csv	-44.7525	172.36			0		20			Boettcher2002		56			ODP initial reports
Boettcher20002 ODP1120.csv	-50.1894	173.234			0		0.4			Boettcher2002		62			ODP initial reports
Boettcher20002 ODP1121.csv	-50.7894	176.719			15.4		0.4			Boettcher2002		72			ODP initial reports
Boettcher20002 ODP1122.csv	-46.7359	-177.278			0		20			Boettcher2002		64			ODP initial reports
Boettcher20002 ODP1123.csv	-41.964	-171.241			0		2			Boettcher2002		71			ODP initial reports
Boettcher2000b B2000b_DT.csv	53.4519	8.09439			0		900	660	1140	Esselink 2000						1									5	vanHeemst2000	Age is only for ultrafiltered fraction
Boettcher2000c BIOTRANS1.csv	47.1861	-19.575			0
Boettcher2000c CAST1.csv	14.4167	64.5667			0			1	1.8	Paropkari1991
Boettcher2000c NAST1.csv	20	65.5833			0		21	9	33	Prins 2000,Paropkari1991						1							3186
Boettcher2000c SAST1.csv	10.0333	65			0		1			Paropkari1991						1
Boettcher2000c WAST-T1.csv	16.2167	60.2667			8.5		1.4	1	1.8	Paropkari1991						1
Boettcher2000c WAST1.csv	16.1686	59.7519			0		4.57			Paropkari1991
Boettcher2004 ODP1124.csv	-39.7336	-176.765			0							78.5			ODP initial reports
Boettcher2004 ODP1125.csv	-42.5182	-177.793			0		20			Boettcher2002
Boettcher2006 L201_1225.csv	2.77278	-110.575			14		3.9	1	6.8	Boettcher2006							0.45	0	0.9	Boettcher2002
Boettcher2006 L201_1226.csv	-3.10278	-90.8189			10.1695		3	1	5	Boettcher2006							1	0	2	Boettcher2003
Boettcher2006 L201_1227.csv	-8.99694	-79.9097			0		2.9	0.8	5	Boettcher2006							5.6	0.6	10.6	Boettcher2004
Boettcher2006 L201_1228.csv	-11.075	-78.0853			0		3.85	2.2	5.5	Boettcher2006							6.55	0.1	13	Boettcher2005
Boettcher2006 L201_1229.csv	-10.9833	-77.9628			0		8										2.4	0.8	4	Boettcher2006
Boettcher2006 L201_1231.csv	-12.0247	-81.9067			15.5759												0.3	0	0.6	Boettcher2007
Borowski2013 ODP994.csv	31.7857	-75.5459			0		11			Paul1996		79.2			ODP initial reports
Borowski2013 ODP995.csv	31.8035	-75.5224			0		10.5	7	14	Paul1996		69.3			OPD initial reports
Borowski2013 PC11-8.csv	31.0085	-74.7521			0
Bruechert1999 B1999_CB.csv	30.1389	-85.5689			0		380			Bruechert1999	210Pb+radiocarbon					1
Bruechert1999 B1999_WB.csv	30.1519	-85.6398			0		520			Bruechert1999	210Pb+radiocarbon					1
Bruechert2001 B2001_D.csv	78.2788	15.1888			0																1	Bruechert2001
Bruechert2001 B2001_F.csv	79.1999	11.8185			0																1	Bruechert2001
Bruechert2001 B2001_G.csv	79.2821	11.6465			0																1	Bruechert2001
Calvert1996 BS4-14GC.csv	43.0783	34.0267			0
Chanton1987 C1987_Oct80.csv	34.6179	-76.548			0
Cremiere2017 C2017_C1.csv	16.2758	-61.555			0	Mangrove Guadalupe	910			Cremiere2017	210Pb
Cremiere2017 C2017_C2.csv	16.2758	-61.555			0	Mangrove Guadalupe	1000			Cremiere2017	210Pb					1
Cremiere2017 C2017_C3.csv	16.2758	-61.555			0	Mangrove Guadalupe	1000			Cremiere2017	210Pb					1
Dale2009 22680.csv	-23.7753	14.2993			0		340			Dale2009		95			Dale2009						12.85	Dale2009
Diaz2012 BCCF10–01.csv	-23.4277	-41.7205			0		1.5			Mendoza et al 2014															1.03
Diaz2012 BCCF10–04.csv	-23.2787	-41.7929			0		4.8			Mendoza et al 2014						1									2.2
Diaz2012 BCCF10–09.csv	-23.1921	-41.8561			0		1.1			Mendoza et al 2014						1									1.36
Diaz2012 BCCF10–15.csv	-23.0546	-41.9298			0		5.23			Mendoza et al 2014															1.09
Donahue2008 ODP1002.csv	10.7247	-65.2005			0		30			Donahue2008		84			Paul2002		4			ODP initial reports			900	Donahue2008
Hardisty2018 FOAM-1.csv	41.2408	-72.7458			0		165	30	300	Hardisty2018
Henneke1997 ABC15.csv	33.8783	26.04			32.3285	Hypersaline																	3350	Henneke1997
Henneke1997 ABC45.csv	34.3733	20.0517			48.0919	Hypersaline	50			Henneke1997		63			Henneke1997								3370	Henneke1997
Hu2017 H2017_D-8.csv	22.0763	118.937		1	0		32	13	51	Hu2017
Hu2017 H2017_D-F.csv	22.0488	118.454		1	0		32	13	51	Hu2017						1
Hu2017 H2017_D7.csv	22.0345	118.486		1	0		32	13	51	Hu2017	14C
Jorgensen2004 RSB4.csv	43.8012	29.7222			0	Black Sea
Jorgensen2004 RSB5.csv	43.7019	29.809			0	Black Sea																	181
Jorgensen2004 RSB6.csv	43.6149	29.8958			0	Black Sea	17			Jorgensen2004													396
Jorgensen2004 RSB7.csv	43.3043	30.0174			0	Black Sea	19			Jorgensen2004
Ku2008 PB1.csv	13.8711	-60.8962			0												1.3			Ku2008
Ku2008 PB3.csv	13.8713	-60.896			0												1.3			Ku2008
Ku2008 PB4.csv	13.8754	-60.8917			0		1750			Ku2008	210Pb						1.4			Ku2008
Ku2008 PB5.csv	13.8726	-60.8915			0		1080			Ku2008	210Pb					1	1			Ku2008
Ku2008 PB6.csv	13.8713	-60.8951			0		1170			Ku2008	210Pb						0.5			Ku2008
Ku2008 SB1.csv	13.7647	-60.9156			0												0.7			Ku2008
Ku2008 SB3.csv	13.7674	-60.9233			0		170			Ku2008	210Pb					1	2.2			Ku2008
Ku2008 SB4.csv	13.7641	-60.9169			0		1740			Ku2008	210Pb						1.1			Ku2008
Ku2008 SB5.csv	13.7613	-60.9285			0		180			Ku2008	210Pb						2.3			Ku2008
Lein1983 AB2656.csv	54.9752	13.3904			0		625			Lein1983
Lein1983 GB2618.csv	57.3424	19.5435			0		625			Lein1984
Lein1983 GB2622.csv	57.2654	19.8569			0		625			Lein1985
Lein1983 GB2682.csv	54.9872	19.0733			0		625			Lein1986
Lein1983 GR2601.csv	57.9709	23.3769			0		625			Lein1987
Lein1983 SS2611.csv	57.9561	20.6579			0		625			Lein1988
Lein1983 SS2631.csv	57.617	19.2583			0		625			Lein1989
Lein2009 Vy20-3205_EXAMPLE.csv	-17.1	9.685			0
Lin 2016b HS373.csv	19.88	115.2		1	0
Lin 2016c 2A.csv	20.05	117.417		1	0
Lin2016 HS148.csv	19.7926	114.993		1	0													0.46	1.9	Lin2016
Lin2016 HS217.csv	19.9498	115.295		1	0													0.46	1.9	Lin2016
Lin2016c DHCL11_2016.csv	21.9333	118.9		1	0
Lin2016c XHCL27A.csv	18.4167	112.067		1	0
Lin2016d 973-4_2016.csv	22.0567	118.833		1	0
Lin2017 DHCL11_2017.csv	21.9333	118.9			81.5		32	13	51	Hu2017						1
Lin2017 HD109.csv	21.3492	119.086			28.48
Lin2018 GMGS2-16.csv	21.9889	118.658			0
Liu2020 973-4_2020.csv	21.9054	118.818			0		32			Liu2020							0.38			Liu2020
Liu2020b BB01.csv	55.382	15.4612			0	Bornholm Basin	65			Liu2020b
Liu2020b BB02.csv	55.388	15.4667			0	Bornholm Basin
Liu2020b BB05.csv	55.407	15.4758			0	Bornholm Basin	49			Liu2020b
Llobet-Brossa2002 LB2002_D.csv	53.4758	8.2231			0	Dangast Wattenmeer
Masterson2018 M2018_AB.csv	24.6363	-110.601			0		51.1			Masterson 2018		89	0.835	0.945	Masterson 2018		7.79			Masterson 2018	9	Masterson2018	408	Masterson2018
Mazumdar2012 SASU973.csv	15.1155	73.879			0		550	260	840	Mazumadar2012													17	Mazumadar2012
Meister2019 ODP1229.csv	-11.0148	-77.8731			0	Peru Margin	40.5	1	80	Meister2019		76			ODP initial reports
Michaud2020 M2020_AC.csv	77.538	15.657			0
Michaud2020 M2020_J.csv	79.715	11.077			0
Michaud2020 M2020_P.csv	78.966	12.256			15.9307
Middelburg1990 K11.csv	1.05827	127.93			0		85	79	91							1
Middelburg1990 K3.csv	0.955289	127.848			0		600	400	800
Middelburg1990 K4.csv	0.957692	127.749			0		71	66	76
Middelburg1990 K9.csv	0.992363	127.89			0		1000	700	1300
Mossmann1991 680.csv	-11.065	-78.0778			0		2.6	2.2	3	Mossmann1991		72			http://www-odp.tamu.edu/publications/112_IR/VOLUME/CHAPTERS/ir112_12.pdf	1									1.325	Reimers&Suess1983PeruOM
Mossmann1991 686.csv	-13.4802	-76.8915			0		5.75	5.5	6	Mossmann1991		72			http://www-odp.tamu.edu/publications/112_IR/VOLUME/CHAPTERS/ir112_18.pdf										1.8	Reimers&Suess1983PeruOM
Neretin2004 N2004_7.csv	43.5219	30.2306			0	Black Sea																	1176	Neretin2004
Peketi2015 MD161-13.csv	16.0328	81.7132			0		573			Peketi2015
Pellerin2018 M1.csv	56.1132	10.33			0		30			Holmkvist2009
Pellerin2018 M24.csv	56.1015	10.4148			0		86			Flury2016
Pellerin2018 M5.csv	56.1015	10.4466			0		140			Langerhuus2012	14C of bivalves
Raven2016 R2016_GC.csv	34.2482	-120.072			10		100			Schimmelmann1990							4			Raven2016			590	Raven2016
Raven2016 R2016_MC.csv	34.2482	-120.072			0		100			Schimmelmann1990							4			Raven2016			590	Raven2016
Riedinger2014 C0004.csv	33.1964	136.714			0		14.1	1.7	26.5	Kinoshita2009		68			Kinoshita2009
Riedinger2014 C0006.csv	33.0355	136.718			0		5			Kinoshita2009b		65			Kinoshita2009b						1.55	Kinoshita2009b
Riedinger2014 C0007.csv	33.0355	136.718			0		1.7			Kinoshita2009d
Riedinger2014 C0008.csv	33.1968	136.718			0		8.3	2.5		Kinoshita2009c
Riedinger2017 13824-1.csv	-38.219	-53.3548			0		360			Warratz2017						1							3821
Riedinger2017 13863-1.csv	-39.3117	-53.9527			0		100			Riedinger2014													3687
Sweeney1980 26.csv	10.8925	-44.0428			0
Sweeney1980 27.csv	15.8565	-56.8793			0
Sweeney1980 38G.csv	26.3867	-110.745			0
Sweeney1980 50G.csv	24.6967	-109.165			0		100			Sweeney 1980						1
Sweeney1980 7G.csv	21.771	-107.65			0		45			Sweeney 1980
Sweeney1980 SanPedroMartir	28.2025	-112.477			0
Turchyn2016 U1385.csv	37.5714	-10.126			0		10.9			Tuchyn2016		70			Tuchyn2016		0.9			Tuchyn2016
Walter1999 W1999_CK.csv	25.0404	-80.6417			0																17.4	Walter1999	1	Walter1999
Walter1999 W1999_SK.csv	24.9174	-80.6654			0																18.5	Walter1999	1	Walter1999
Walter1999 W1999_TK.csv	24.9994	-80.5054			0																21	Walter1999	1	Walter1999
Wehrmann2014 W2014_AB.csv	77.5862	15.0767	0		0		80			Wehrmann2014		77			Kostka et al 1999		1.6			Wehrmann2014			178	Wehrmann2014
Wehrmann2014 W2014_AC.csv	77.5527	15.654	0		0		60			Wehrmann2014							1.6			Wehrmann2014			214	Wehrmann2014
Wehrmann2014 W2014_GK.csv	79.6415	11.3493	0		0		440			Wehrmann2014							0.75			Wehrmann2014			198	Wehrmann2014
Wehrmann2014 W2014_GN.csv	79.7502	11.0998	0		0		30			Wehrmann2014							1.4			Wehrmann2014			48	Wehrmann2014
Wehrmann2014 W2014_HA.csv	77.534	15.8377	0		0												1.48			Wehrmann2014			57	Wehrmann2014
Wehrmann2014 W2014_HB.csv	79.0345	11.702	0		2.83843												0.9			Wehrmann2014			330	Wehrmann2014
Wehrmann2014 W2014_IA.csv	78.8958	12.337	0		0		3600			Wehrmann2014							0.48			Wehrmann2014			170	Wehrmann2014
Wehrmann2014 W2014_J.csv	79.7138	11.085	0		0		190			Wehrmann2014							1.3			Wehrmann2014			28	Wehrmann2014
Wehrmann2014 W2014_Q.csv	79.9072	11.2978	0		0												0.45			Wehrmann2014			66	Wehrmann2014
Wehrmann2014 W2014_T.csv	78.9677	11.882	0		0		357			Wehrmann2014							1.2			Wehrmann2014			101	Wehrmann2014
Wehrmann2015 U1317.csv	51.4099	-11.5556			0		31			Wehrmann2015
Wehrmann2017 KFIN.csv	78.9905	12.2978			0												0.48			Wehrmann2017	1.9	Wehrmann2017	175	Wehrmann2017
Wehrmann2017 KFMID1.csv	78.9645	12.2523			0												0.62			Wehrmann2017	2.1	Wehrmann2017	132	Wehrmann2017
Wehrmann2017 KFMID2.csv	78.957	12.161			0												0.82			Wehrmann2017	3.3	Wehrmann2017	214	Wehrmann2017
Wehrmann2017 SBFIN.csv	79.6497	11.2333			0												0.85			Wehrmann2017	1.8	Wehrmann2017	51	Wehrmann2017
Wehrmann2017 SBFMID.csv	79.6644	11.1917			0												1.09			Wehrmann2017	1.1	Wehrmann2017	88	Wehrmann2017
Wehrmann2017 SBFOUT.csv	79.7049	11.1097			0												1.6			Wehrmann2017	2.3	Wehrmann2017	83	Wehrmann2017
Wehrmann2017 VMFIN.csv	77.8337	16.566			0												2.07			Wehrmann2017	−0.8	Wehrmann2017	67	Wehrmann2017
Wehrmann2017 VMFMID.csv	77.8293	15.9926			0												1.85			Wehrmann2017	2.7	Wehrmann2017	31	Wehrmann2017
Wehrmann2017 VMFOUT.csv	77.7637	15.0637			0												1.88			Wehrmann2017	−0.7	Wehrmann2017	117	Wehrmann2017
Werne2003 1002.csv	10.7234	-65.1885			0		30			Werne2003							4			http://www-odp.tamu.edu/publications/165_IR/VOLUME/CHAPTERS/ir165_07.pdf
Wijsman2001 W2001_10.csv	44.1797	30.0922	0		0	Black Sea											2.93			Wijsmann2001	6.6	Wijsmann2001	72	Wijsmann2001
Wijsman2001 W2001_13.csv	46.0608	30.5348			0	Black Sea											0.64			Wijsmann2001	8.4	Wijsmann2001	13	Wijsmann2001
Wijsman2001 W2001_16.csv	45.2287	30.9226			0	Black Sea											2.78			Wijsmann2001	5.5	Wijsmann2001	54	Wijsmann2001
Wijsman2001 W2001_19.csv	44.3619	30.8376			0	Black Sea											2.53			Wijsmann2001	7.7	Wijsmann2001	120	Wijsmann2001
Wijsman2001 W2001_2.csv	44.0432	28.7985			0	Black Sea											2.15			Wijsmann2001	6.5	Wijsmann2001	26	Wijsmann2001
Wijsman2001 W2001_22.csv	43.2987	30.9046	0		0	Black Sea											4.64			Wijsmann2001	9	Wijsmann2001	1494	Wijsmann2001
Wijsman2001 W2001_24.csv	44.0334	30.4168	0		0	Black Sea											1.56			Wijsmann2001	7.5	Wijsmann2001	137	Wijsmann2001
Wijsman2001 W2001_6.csv	43.6509	28.7679			0	Black Sea											0.84			Wijsmann2001	6.8	Wijsmann2001	52	Wijsmann2001
Wijsman2001 W2001_9.csv	44.5667	29.7667	0		0	Black Sea											1.71			Wijsmann2001	6.6	Wijsmann2001	57	Wijsmann2001
Yucel2012 8-19.csv	41.4997	40.7522			0	Black Sea	740	710	770	Yucel2012	137Cs												1741	Yucel2012
Yucel2012 8-23.csv	42.034	39.5337			0	Black Sea	48			Yucel2012	210Pb					1							2002	Yucel2012
Yucel2012 8-30.csv	42.5147	30.9967			0	Black Sea	1240	1210	1270	Yucel2012	137Cs												2159	Yucel2012
Yucel2012 8-7.csv	42.7837	37.493			0	Black Sea	47			Yucel2012	210Pb					1							2145	Yucel2012
Zhu2016 DH5-1.csv	27.7333	121.3			0		1100			Zhu2016													33	Zhu2016
Zhu2016 DH7-1.csv	27.6333	121.283			0		550			Zhu2016													20	Zhu2016
Zindorf2019 U1417.csv	56.96	-147.11			-57.8035		90	2	140	Zindorf2019						1
Zopfi2008 Z2008_14.csv	-36.5336	-73.05			0
Zopfi2008 Z2008_18.csv	-36.5049	-73.1234			2.91005
Zopfi2008 Z2008_4.csv	-36.6356	-73.0342	0		0
Zopfi2008 Z2008_7.csv	-36.1014	-73.0017			1.78571
