# Supplementary material for: Quantifying key drivers of marine pyrite burial flux and isotopic composition
Source: Research Square preprint supplement (doi:10.21203/rs.3.rs-4788953/v1), 2024-11-01
Supplement: Supplementary file 472 [file R2016_GC.xlsx]

## Sheet: Sheet1
reference	latitude_dd	longitude_dd	water_depth_m	depth_cm	age_yr	porosity_vol_	SO4_mM	H2S_mM	CH4_mM	S_py_wt_	S_AVS_wt_	S0_wt_	TOC_wt_	Fe_HR_wt_	Fe_tot_wt_	d34S_SO4	d34S_H2S	d34S_py	lnSRR_molL_1d_1	lnMOR_molL_1d_1	sed_rate_cmky
Raven2016	34.2482	-120.072	475	10			28.1	0.2								12.4	-24.5
				12.5			27.3	0.08									-14.1
				15			25.7	0.01
				17.5			27.8	0.07									-13.2
				20			24.6	0.05
				22.5			24.3	0								31		-36.6
				25			23.9	0
				27.5			21.5	0.08									-18.1
				30			22.7	0.5									-14.3
				32.5			23.1	0.36								34	-14.2
				35			20.4	0.26									-14.8
				37.5			25.4	0.43									-16.7
				40			25.1	0.42								33.9	-16.7
				42.5			20.1	0.26								39	-11	-37.9
				45			21.1	0.18								40.3	-6.4
				47.5			18.8	0.11								41.6	-15.3
				50			21.5	0.37								37	-14.5
				52.5			22.7	0.48								42.4	-13	-34.8
				55			18.6	0.45								43.1	-13.7
				57.5			19.4	0.47								38.6	-13.7	-33.8
				60			18.9	0.78								45.1
				62.5				0.89										-31.3
				65			16.8	0.67								44.6
				67.5			15.8	0.69								49.4	-12.6
				70
				72.5			19.6	0.44								45.9		-27.8
				75			17	0.47								48.8
				77.5			17.4	0.5									-8.5	-26.9
				80			17.8	0.9								48.8
				82.5			15	0.31								49.2
				85			14.9	0.65								44.7	-6.3	-31.2
				87.5			13.8									50.3
				90			16	1.09								50.9		-29.3
				92.5			13.8									51.7
				95			16	1.3								47.3	-5.4	-33.8
				97.5			12.1
				100			11	1.35									-0.5	-32.6
				102.5			12	1.33
				105			10.5	1.38								50	-3.1
				107.5
				110			13.9	1.33								52.5		-35.9
				112.5			10.9	1.24									-0.7
				115			10.6	1.48										-35
				117.5			10.1										-4.7
				120			7.7	1.8									-3.9	-33.9
				122.5			9.7	1.88								51.2
				125			11.8	1.92									1.9	-35.9
				127.5			9	1.16									2.1
				130			9.2	1.31										-36.2
				132.5			8.5	1.23								55.2	7.1	-37.3
				135			9.2	1.81
				137.5			9.5	1.99									5.3
				140			8.1	1.1								51.9	7.9	-34.7
				142.5			7.9	1.61									4
				145			8.5									49.4		-34.9
				147.5
				147.5			3.9	1.33
				150			3.5	2.03										-32
				152.5
				152.5			7.4	2.14								51.3	12.2
				155			5.1	2.19										-34
				157.5			3.1	2.45									12.8
				160				2.12								46.6
				162.5				2.15									11.1
				165			5.1	1.84								44.4	15.6	-27.3
				167.5			3.3	1.34
				170			4.9	1.77								45.8	17.7	-26.1
				172.5			3.4	1.99								61.75
				175			3.9	2.15								41.9	19.3	-28.4
				177.5			1.9	1.93								49.84
				180			1.2	2.11								33.18	22.6	-25.9
				182.5			2.9	2.44								31
				185			2	2.49								35.23
				187.5			3.4	2.3								53.05
				190			1.6	2.7								22.6	22.9	-26.1
				192.5			2.5	1.42								31.24
				195			2	1.49								25.03
				197.5			1	1.57								24.7	21.7	-25.3
				200			1.2	1.82								29.66
				202.5			2.5	1.45								25.8
				205			1.3	1.52									22
				207.5			1.5	1.04								28.56		-24.7
				212.5
				10									4.47911
				12.5						0.811931			4.55909
				15						0.689256			4.20796
				17.5									3.58075
				20
				22.5						0.680078
				25						0.520092			4.36678
				27.5						0.739826			4.02589
				30									4.15976
				32.5						0.764241
				35									4.89715
				37.5						0.791235			4.69284
				40
				42.5						0.899812			3.12132
				45									4.38192
				47.5									3.96634
				50						1.21919			3.78746
				52.5									3.4044
				55						0.941804
				57.5						0.689856			4.30927
				60									4.01594
				62.5						0.67006
				67.5						0.96022
				70						0.775038			3.76846
				72.5
				75									4.11768
				77.5						0.881996			3.44728
				80									3.36165
				82.5									3.45395
				85									3.50899
				90						0.824828			4.16121
				92.5									3.95828
				95						1.22638			3.87359
				97.5
				100						0.830227			3.32726
				102.5									3.53996
				105									4.04459
				107.5						1.16358			4.10817
				110
				112.5
				115						0.703653
				120						0.847503
				122.5
				125						0.902812
				130									3.12572
				132.5						0.91421
				135						1.26574
				140						0.789196
				142.5
				145						1.12489
				147.5									4.47436
				150						0.469942
				152.5
				155						0.701494
				160
				162.5									3.67704
				165						0.736287			3.81351
				167.5									3.67163
				170						0.667061			3.72681
				172.5									4.26974
				175									3.63061
				177.5									3.95428
				180						0.655064			4.103
				182.5									3.9052
				185						0.91025			4.1537
				190						0.693755
				192.5									3.51505
				197.5									3.09209
				200									3.12902
				202						0.647265
				207						0.71745
				45										0.153996
				47.5
				50
				52.5
				55
				57.5
				60										0.125749
				62.5										0.106146
				67.5
				70
				72.5
				75										0.12333
				77.5
				80										0.11866
				82.5
				85
				90
				92.5
				95
				97.5										0.102359
				100
				102.5
				105
				107.5
				110
				112.5										0.0830531
				115
				120
				122.5										0.0834637
				125
				130
				132.5										0.0747702
				135
				140
				142.5										0.0713413
				145
				147.5
				150
				152.5										0.0825474
				155
				160
				162.5
				165
				167.5										0.0789149
				170
				172.5
				175
				177.5										0.0802103
				180
				182.5
				185
				190
				192.5										0.0796706
				197.5
				200										0.0816354
