# Supplementary material for: Quantifying key drivers of marine pyrite burial flux and isotopic composition
Source: Research Square preprint supplement (doi:10.21203/rs.3.rs-4788953/v1), 2024-11-01
Supplement: Supplementary file 475 [file R2016_MC.xlsx]

## Sheet: Sheet1
reference	latitude_dd	longitude_dd	water_depth_m	depth_cm	age_yr	porosity_vol_	SO4_mM	H2S_mM	CH4_mM	S_py_wt_	S_AVS_wt_	S0_wt_	TOC_wt_	Fe_HR_wt_	Fe_tot_wt_	d34S_SO4	d34S_H2S	d34S_py	lnSRR_molL_1d_1	lnMOR_molL_1d_1	sed_rate_cmky
Raven2016	34.2482	-120.072	475	0.436364
				1														-25.7
				1.16613												22.9784
				1.84091													6.10267
				2.18182
				3.5														-20.9
				3.60206													1.65311
				3.92727
				5.34856													-10.2528
				5.41879												25.4593
				6
				6.10909
				7.82334													-11.8253
				8.29091
				8.5														-21.6
				9.81818
				9.84458												25.9778
				9.95262													-9.08046
				11														-25.8
				11.3455
				12.6039													-10.9147
				13.3091
				13.5
				13.6802													-3.59028
				15.9875													-0.322408
				16														-28.3
				16.1455
				17.2828												28.3245
				18.4657													-0.194256
				18.5455
				19.5829												27.9295
				20.0727
				21														-32.1
				21.1205													-0.197108
				21.819													-5.03797
				22.0364
				22.0605												27.7961
				23.5
				23.932													-10.5344
				24.4364
				26														-32.2
				26.0523													-12.3681
				26.1336												28.969
				27.0545
				28.1839													-8.44598
				28.3636
				28.5
				30.1231													-12.3725
				30.3273
				31														-33.1
				32.0727
				32.4258													-11.4593
				33.5
				33.8182
				33.9227												29.7455
				34.8975													-14.6014
				36														-35.3
				36.327													-7.66984
				36.8727
				38.5
				38.6182
				38.6194													-11.9892
				40.3636
				40.7569													-5.05832
				41														-35.6
				42.1602													-11.4697
				42.3273
				42.4214												31.3062
				43.5
				44.6373													-11.8648
				44.7273
				46														-36.7
				46.2323													-10.82
				46.6909
				47.6338													-18.1471
				48.2182
				48.5
				50.6416													-18.6736
				50.7391												30.9048
				50.8364
				51														-33.8
				52.3636
				52.7743													-14.2282
				53.5
				54.3273
				55.0744													-14.6231
				56														-35.5
				56.3043													-19.2029
				56.5091
				58.5
				58.6358													-3.63857
				58.9091
				59.236												31.5497
				60.1973													-19.5996
				60.6545
				61														-35.7
				62.8625													-14.3699
				63.2727
				63.5
				64.806													-16.0725
				65.6727
				66														-37.7
				66.1091
				66.932													-15.0283
				69.2279													22.0262
				1									4.40633
				3.5
				6									5.41979
				8.5
				11									3.87511
				13.5
				16
				21
				23.5
				26									4.06791
				28.5									3.56559
				31									4.20573
				33.5
				36									3.41375
				38.5									3.96942
				41
				43.5									3.84135
				46									3.37506
				48.5									4.08154
				51
				53.5									3.91716
				56									4.58394
				58.5									5.04326
				61									4.27577
				63.5									3.81694
				66									4.03407
				1						0.475281				0.482472
				3.5										0.566464
				6										0.617706
				8.5
				11						0.52741				0.562047
				13.5
				16						1.09771				0.368854
				21
				23.5
				26										0.248475
				28.5
				31						0.798794
				33.5
				36										0.208894
				38.5
				41
				43.5
				46										0.196596
				48.5
				51
				53.5
				56										0.16424
				58.5
				61						0.819909				0.13979
				1			26.9	1
				3			27.5	1.3
				5			23.9	1.1
				7			28.2	0.7
				9			20.7	0.8
				11			20.2	0.5
				13			23.2	0.7
				15			25.6	0.7
				17			22.5	0.8
				19			20.4	0.7
				21			23.9	0.7
				23			24.8	0.6
				25			24.5	0.6
				27			23.4	0.6
				29			23.4	0.5
				31			21.4	0.7
				33			23.3	0.4
				35			23.4	0.6
				37			27	0.7
				39			22.1	0.6
				41			17.9	0.8
				43			19.2	0.7
				45			22.7	0.7
				47			21.3	0.5
				49			23.2	0.6
				51			22.1	0.6
				53			23.9	0.7
				55			23.1	0.7
				57			22.9	0.8
				59			22.4	0.9
				61			21.8	0.8
				63			22.1	0.6
				65			22.7	0.8
				67			19.3	0.8
