# Supplementary material for: Quantifying key drivers of marine pyrite burial flux and isotopic composition
Source: Research Square preprint supplement (doi:10.21203/rs.3.rs-4788953/v1), 2024-11-01
Supplement: Supplementary file 478 [file RMT-2.xlsx]

## Sheet: Sheet1
reference	latitude_dd	longitude_dd	water_depth_m	depth_cm	age_yr	porosity_vol_	SO4_mM	H2S_mM	CH4_mM	S_py_wt_	S_AVS_wt_	S0_wt_	TOC_wt_	Fe_HR_wt_	Fe_tot_wt_	d34S_SO4	d34S_H2S	d34S_py	lnSRR_molL_1d_1	sed_rate_cmky
Aller2010	2.31417	-48.8548		7.27651			32.0652
				42.2037			30.5435
				85.8628			30.6522
				116.424			30.6522
				148.441			29.3478
				189.189			24.2391
				221.206			21.087
				253.222			16.413
				295.426			10.9783
				325.988			7.06522
				356.549			4.02174
				382.744			2.28261
				432.225			1.41304
				461.331			0.652174
				503.534			0.108696
				534.096			0.108696
				569.023			0.108696
				608.316			0.434783
				640.333			0.217391
				679.626			0.108696
