# Supplementary material for: Quantifying key drivers of marine pyrite burial flux and isotopic composition
Source: Research Square preprint supplement (doi:10.21203/rs.3.rs-4788953/v1), 2024-11-01
Supplement: Supplementary file 481 [file RP47.xlsx]

## Sheet: Sheet1
reference	latitude_dd	longitude_dd	water_depth_m	depth_cm	age_yr	porosity_vol_	SO4_mM	H2S_mM	CH4_mM	S_py_wt_	S_AVS_wt_	S0_wt_	TOC_wt_	Fe_HR_wt_	Fe_tot_wt_	d34S_SO4	d34S_H2S	d34S_py	lnSRR_molL_1d_1	sed_rate_cmky
Boettcher1998b	7.753	53.012		0.191388			24.6415
				1.24402			21.2075
				3.15789			19.7547
				5.16746			19.3585
				7.08134			18.8302
				9.2823			18.3019
				11.2919			17.5094
				13.2057			16.8491
				15.1196			16.8491
				17.1292			16.8491
				19.0431			16.8491
				21.0526			16.8491
				22.9665			16.0566
				26.9856			16.1887
				28.9952			16.1887
				0.0956938												20.5472
				1.05263												26.2264
				3.15789												31.3774
				5.16746												34.283
				7.17703												36.3962
				9.09091												38.5094
				11.1005												41.0189
				13.0144												44.1887
				15.1196												44.8491
				16.9378												45.3774
				18.9474												45.6415
				20.8612												45.5094
				22.8708												44.9811
				26.89												47.0943
				1.15663									0.0848485
				2.89157									0.142424
				5.10843									0.0606061
				6.93976									0.0333333
				8.77108									0.145455
				10.8916									0.127273
				13.3012									0.139394
				15.6145									0.172727
				18.3133									0.257576
				20.8193									0.378788
				24.2892									0.39697
				27.2771									0.463636
				29.8795									0.324242
				32.5783									0.460606
				35.759									0.412121
