# Supplementary material for: Quantifying key drivers of marine pyrite burial flux and isotopic composition
Source: Research Square preprint supplement (doi:10.21203/rs.3.rs-4788953/v1), 2024-11-01
Supplement: Supplementary file 484 [file RP63.xlsx]

## Sheet: Sheet1
reference	latitude_dd	longitude_dd	water_depth_m	depth_cm	age_yr	porosity_vol_	SO4_mM	H2S_mM	CH4_mM	S_py_wt_	S_AVS_wt_	S0_wt_	TOC_wt_	Fe_HR_wt_	Fe_tot_wt_	d34S_SO4	d34S_H2S	d34S_py	lnSRR_molL_1d_1	sed_rate_cmky
Boettcher1998b	7.76211	53.7224		0.135176			29.8046
				0.995285			16.0013
				3.0807			12.479
				4.80637			12.2965
				7.01278			12.2569
				9.02734			12.2208
				10.8511			12.3396
				12.9605			12.1502
				14.878			11.9643
				16.7018			12.0831
				19.002			11.7388
				20.7277			11.5563
				22.933			11.3652
				24.8516			11.3308
				26.8651			11.1431
				28.7837			11.1087
				30.7982			11.0725
				32.8139			11.1879
				34.8252			10.6972
				0.0268237												21.7543
				1.21214												37.2017
				3.05501												47.4937
				4.97037												48.0883
				6.97707												46.8641
				8.98632												46.7006
				11.0945												47.9001
				12.9098												46.677
				14.9213												47.4226
				16.8344												47.1081
				18.9408												47.55
				20.9515												47.9925
				24.8736												47.3629
				26.785												46.2908
				28.7993												48.2484
				30.9039												47.9328
				32.8156												47.0122
				34.8295												48.8183
				0.984849									0.0668235
				3.12224									0.0723788
				5.25449									0.0567231
				7.88026									0.0742841
				10.9878									0.0765796
				14.0071									0.11526
				17.3088									0.117509
				20.3295									0.16225
				23.4665									0.28575
				26.0628									0.182106
				28.4804									0.142141
				31.0282									0.238508
				32.9847									0.298651
				35.0419									0.373923
				38.1781									0.0943931
