# Supplementary material for: Quantifying key drivers of marine pyrite burial flux and isotopic composition
Source: Research Square preprint supplement (doi:10.21203/rs.3.rs-4788953/v1), 2024-11-01
Supplement: Supplementary file 487 [file RSB4.xlsx]

## Sheet: Sheet1
reference	latitude_dd	longitude_dd	water_depth_m	depth_cm	age_yr	porosity_vol_	SO4_mM	H2S_mM	CH4_mM	S_py_wt_	S_AVS_wt_	S0_wt_	TOC_wt_	Fe_HR_wt_	Fe_tot_wt_	d34S_SO4	d34S_H2S	d34S_py	lnSRR_molL_1d_1	sed_rate_cmky
Jorgensen2004	43.8012	29.7222	130	0.0114274				0.00458009
				36.0134				0.0341409
				42.0471				0.0524263
				49.5435				0.0569626
				58.514				0.0523301
				67.6388				0.109529
				76.9292				0.233139
				84.477				0.258285
				99.5498				0.299419
				108.635				0.340587
				117.685				0.368015
				129.821				0.432066
				140.197				0.390784
				146.334				0.450291
				158.452				0.507472
				170.234				0.42954
				177.639				0.397436
				198.3				0.278231
				207.287				0.280469
				187.546				0.168371
				217.446				0.152165
				227.674				0.0513424
				236.541				0.00548911
				241.021				0.000882803
				250.003				0.000830359
				264.978				0.003033
				-0.249699			16.7506
				2.70129			16.2938
				5.66931			16.0651
				10.0901			15.3037
				10.0617			14.9235
				10.0447			14.6954
				18.9771			14.3895
				18.9147			13.553
				30.8662			13.7028
				39.7362			12.5604
				50.0817			11.1895
				58.9801			10.4274
				69.3596			9.51279
				78.224			8.29435
				91.5829			7.30317
				100.487			6.61703
				109.38			5.77881
				118.272			4.94058
				130.156			4.17782
				139.037			3.18751
				149.439			2.57713
				159.819			1.66257
				168.74			1.20457
				180.652			0.822033
				189.607			0.820298
				198.534			3.033
				205.996			0.436895
				21.0957					-0.0182504
				25.6081					-0.00292696
				34.6328					0.02772
				42.163					0.0280069
				55.7172					0.0285235
				61.7242					0.0742069
				73.7781					0.0595148
				84.3088					0.0902191
				91.8104					0.166263
				99.3462					0.151398
				109.883					0.166951
				120.402					0.227958
				133.951					0.243626
				145.976					0.30469
				165.52					0.396344
				177.511					0.548316
				186.416					0.897141
				195.384					1.0793
				216.223					1.73161
				238.471					2.64155
				226.354					2.8229
				23.8806												20.3053
				37.3134												28.3206
				56.7164												31.374
				80.597												34.0458
				108.955												37.0992
				141.791												47.0029
				24.0964														-4.94208
				43.6747														-15.5985
				64.759														0.849421
				87.3494														-16.0618
				106.928														2.47104
				123.494														15.444
				135.542														15.444
				144.578														9.65251
				158.133														8.72587
				165.663														11.5058
				173.193														19.3822
				186.747														31.1969
				203.313														22.8571
				215.361														21.6988
				225.904														16.6023
				234.94														14.9807
				259.036														11.5058
				268.072														0.3861
