# Supplementary material for: Quantifying key drivers of marine pyrite burial flux and isotopic composition
Source: Research Square preprint supplement (doi:10.21203/rs.3.rs-4788953/v1), 2024-11-01
Supplement: Supplementary file 490 [file RSB5.xlsx]

## Sheet: Sheet1
reference	latitude_dd	longitude_dd	water_depth_m	depth_cm	age_yr	porosity_vol_	SO4_mM	H2S_mM	CH4_mM	S_py_wt_	S_AVS_wt_	S0_wt_	TOC_wt_	Fe_HR_wt_	Fe_tot_wt_	d34S_SO4	d34S_H2S	d34S_py	lnSRR_molL_1d_1	sed_rate_cmky
Jorgensen2004	43.7019	29.809	181	-0.025526				0.0120343
				36.4288				0.170362
				49.7183				0.209962
				59.7117				0.225479
				68.582				0.246149
				79.7145				0.247917
				90.7609				0.296104
				99.695				0.282389
				107.35				0.358068
				119.535				0.392506
				127.269				0.425205
				136.168				0.430402
				157.342				0.421899
				148.347				0.468278
				167.202				0.509622
				176.123				0.502785
				188.283				0.550976
				198.292				0.557897
				208.528				0.442756
				218.573				0.430766
				228.754				0.344851
				237.912				0.210795
				248.176				0.080181
				255.991				0.0699003
				270.563				0.0183889
				-1.11857			17.192
				6.71141			16.8481
				17.8971			16.1032
				24.6085			15.8739
				40.2685			14.1547
				49.217			12.9513
				59.2841			11.404
				70.4698			11.9198
				78.2998			9.5702
				85.0112			9.51289
				98.434			8.82522
				107.383			8.13754
				117.45			7.10602
				130.872			6.1318
				136.465			5.38682
				146.532			4.58453
				154.362			3.61031
				164.43			2.06304
				173.378			2.29226
				189.038			1.43266
				194.631			0.916905
				204.698			0.458453
				212.528			0.229226
				220.358			0.0573066
				233.781
				29.5707												28.2173
				46.4148												29.0892
				66.6008												32.5423
				99.1526												35.4314
				127.159												42.9018
				161.822												57.8268
				38.4615														6.9914
				59.9547														6.9914
				79.1855														6.30373
				98.4163														4.75645
				118.778														7.16332
				138.009														57.8268
				158.371														15.0716
				168.552														15.7593
				178.733														17.6504
				188.914														17.6504
				197.964														22.4642
				207.014														21.0888
				213.801														22.6361
				228.507														23.4957
