# Supplementary material for: Quantifying key drivers of marine pyrite burial flux and isotopic composition
Source: Research Square preprint supplement (doi:10.21203/rs.3.rs-4788953/v1), 2024-11-01
Supplement: Supplementary file 493 [file RSB6.xlsx]

## Sheet: Sheet1
reference	latitude_dd	longitude_dd	water_depth_m	depth_cm	age_yr	porosity_vol_	SO4_mM	H2S_mM	CH4_mM	S_py_wt_	S_AVS_wt_	S0_wt_	TOC_wt_	Fe_HR_wt_	Fe_tot_wt_	d34S_SO4	d34S_H2S	d34S_py	lnSRR_molL_1d_1	sed_rate_cmky
Jorgensen2004	43.6149	29.8958	396	0				0.11
				34.7072				0.296667
				44.4685				0.393333
				50.9761				0.473333
				62.9067				0.506667
				72.6681				0.32
				82.4295				0.28
				92.1909				0.243333
				104.121				0.47
				112.798				0.66
				121.475				0.673333
				134.49				0.65
				143.167				0.783333
				150.759				0.79
				160.521				0.816667
				170.282				0.816667
				181.128				0.903333
				194.143				0.906667
				200.651				1.05333
				211.497				1.00333
				221.258				0.916667
				233.189				0.86
				241.866				0.8
				248.373				0.776667
				259.219				0.79
				271.15				0.67
				292.842				0.503333
				303.688				0.48
				324.295				0.283333
				312.364				0.18
				334.056				0.14
				344.902				0.0733333
				352.495				0.0333333
				361.171				0.00333333
				-1.22626			17.5021
				0.934147			17.1666
				6.36255			16.8306
				10.6834			16.1596
				16.1544			16.6058
				19.3889			15.9908
				21.5402			15.4877
				37.8771			15.4295
				44.3005			13.3615
				53.0456			13.9189
				62.7491			12.074
				72.5227			11.5139
				82.3297			11.5684
				92.0546			10.1145
				102.899			9.21905
				113.753			8.49124
				124.625			8.09862
				134.386			7.3151
				145.255			6.86662
				152.826			5.85995
				162.606			5.41162
				172.364			4.57223
				182.143			4.1239
				191.911			3.45211
				201.672			2.66859
				212.538			2.16424
				224.497			1.7156
				233.184			1.21156
				241.871			0.707525
				251.66			0.426794
				261.455			0.257793
				273.428			0.0884797
				282.137			-0.0244997
				294.119			0.00333333
				303.923			-0.0276206
				310.459			-0.0285569
				320.26			-0.0858269
				31.4534					0.0445682
				42.2993					0.0445682
				49.8915					0.0445682
				57.4837					0.0334262
				70.4989					0.0334262
				79.1757					0.0445682
				88.9371					0.0445682
				100.868					0.0445682
				109.544					0.0334262
				120.39					0.0779944
				132.321					0.111421
				140.998					0.144847
				148.59					0.211699
				159.436					0.267409
				170.282					0.356546
				181.128					0.367688
				190.889					0.467967
				210.412					0.590529
				220.174					0.579387
				232.104					0.713092
				244.035					0.913649
				249.458					1.11421
				259.219					1.33705
				268.98					1.58217
				280.911					1.91643
				289.588					2.00557
				300.434					2.50696
				310.195					2.76323
				47.7264													-30.5201
				75.9239													-24.6668
				126.935													-17.6861
				165.957													-7.65843
				206.063													2.64782
				251.591													14.069
				281.981													18.2573
				31.8508												30.0241
				44.849												34.2
				75.2506												37.2772
				125.184												43.4237
				166.431												48.7308
				206.615												51.8149
				40.1758														-35.8165
				61.8678														-35.8323
				80.3243														-34.1603
				100.99														-28.8383
				121.701														-19.3028
				141.592														51.8149
				163.296														15.7793
				180.683														18.8565
				203.441														17.1546
				211.025														16.3064
				232.762														20.504
				251.17														17.6817
				262.028														18.7974
				283.741														20.7478
				290.258														21.5858
				302.155														18.4873
				310.85														20.1663
				321.599														11.1697
				331.385														13.4098
				341.125														11.4364
				354.137														11.1461
