# Supplementary material for: Quantifying key drivers of marine pyrite burial flux and isotopic composition
Source: Research Square preprint supplement (doi:10.21203/rs.3.rs-4788953/v1), 2024-11-01
Supplement: Supplementary file 496 [file RSB7.xlsx]

## Sheet: Sheet1
reference	latitude_dd	longitude_dd	water_depth_m	depth_cm	age_yr	porosity_vol_	SO4_mM	H2S_mM	CH4_mM	S_py_wt_	S_AVS_wt_	S0_wt_	TOC_wt_	Fe_HR_wt_	Fe_tot_wt_	d34S_SO4	d34S_H2S	d34S_py	lnSRR_molL_1d_1	sed_rate_cmky
Jorgensen2004	43.3043	30.0174	1176	-0.358541				0.330576												19
				48.0833				0.667003												19
				54.6685				0.595424												19
				67.5969				0.675404												19
				80.7015				0.592851												19
				78.2874				0.81873												19
				90.2327				0.805039												19
				97.9862				0.656333												19
				107.694				0.705988												19
				128.364				0.648281												19
				146.697				0.744828												60
				167.31				0.739463												60
				188.987				0.753388												60
				205.414				0.607498												60
				230.288				0.673788												60
				247.626				0.687683												60
				267.259				0.585892												60
				286.913				0.464817												60
				308.73				0.349268												60
				328.483				0.137285												60
				348.071				0.0768157												60
				365.484				0.0218411												60
				-0.117358			17.9708													60
				2.04925			17.7495													60
				4.20383			17.3072													60
				6.37044			17.0859													60
				9.62036			16.7539													60
				12.8733			16.4772													60
				13.9476			16.2008													60
				18.2808			15.7583													60
				20.4504			15.5922													60
				24.7927			15.3154													60
				28.0336			14.8177													60
				48.6344			13.0468													60
				58.4173			12.6587													60
				69.2925			12.3257													60
				89.9174			10.9968													60
				99.6882			10.3877													60
				110.566			10.11													60
				130.123			9.16799													60
				149.701			8.61277													60
				171.43			7.56													60
				189.895			6.56294													60
				209.478			6.1182													60
				226.889			5.78427													60
				246.479			5.45004													60
				266.066			5.06055													60
				285.659			4.78156													60
				306.338			4.44717													60
				325.928			3.8338													60
				347.699			3.83364													60
				50.0096					0.0458468											60
				59.7893					0.0345225											60
				72.836					0.0452058											60
				79.3578					0.0450227											60
				88.0505					0.0337289											60
				100.007					0.0333931											60
				107.616					0.0331794											60
				130.451					0.0656874											60
				151.095					0.0319585											60
				168.495					0.064619											60
				192.43					0.141295											60
				208.821					0.461277											60
				231.717					0.714777											60
				251.333					0.902072											60
				270.962					1.13356											60
				290.62					1.47555											60
				310.291					1.86174											60
				332.126					2.21472											60
				41.7173													-25.6307
				64.2376													-24.2779
				81.3931													-22.9298
				106.047													-20.2418
				146.76													-13.54
				187.497													-9.50487
				258.292													-7.11044
				309.764													-3.73269
				42.1823												42.3697
				61.4807												44.0531
				82.9131												47.0716
				108.625												51.4271
				147.198												57.4604
				186.826												65.4946
				256.527												70.2214
				306.927												-3.73269
				37.797														-37.6602
				56.1555														-33.649
				77.7538														-29.3036
				96.1123														-30.6407
				118.79														-36.6574
				138.229														-19.9443
				157.667														-15.9331
				178.186														-3.73269
				197.624														-17.9387
				217.063														-29.9721
				238.661														-22.9526
				259.179														12.4791
				277.538														7.79944
				298.056														9.47075
				318.575														2.11699
				336.933														-3.89972
				358.531														-2.56267
				457.883														-2.56267
