# Supplementary material for: Quantifying key drivers of marine pyrite burial flux and isotopic composition
Source: Research Square preprint supplement (doi:10.21203/rs.3.rs-4788953/v1), 2024-11-01
Supplement: Supplementary file 499 [file SAST1.xlsx]

## Sheet: Sheet1
reference	latitude_dd	longitude_dd	water_depth_m	depth_cm	age_yr	porosity_vol_	SO4_mM	H2S_mM	CH4_mM	S_py_wt_	S_AVS_wt_	S0_wt_	TOC_wt_	Fe_HR_wt_	Fe_tot_wt_	d34S_SO4	d34S_H2S	d34S_py	lnSRR_molL_1d_1	ExtraVar1	sed_rate_cmky
Boettcher2000c	10.0333	65	4426	0.70922									0.368421
				1.77305									0.370813
				2.76596									0.289474
				3.75887									0.284689
				4.75177									0.330144
				5.60284									0.354067
				6.59574									0.267943
				7.44681									0.282297
				8.58156									0.325359
				9.43262									0.342105
				10.922									0.258373
				12.9787									0.210526
				14.8936									0.167464
				16.9504									0.119617
				-0.0562558												20.3948
				1.7587												20.6063
				3.28556												20.4984
				5.42385												20.5017
				9.35948												20.6052
				18.8752												20.6971
				28.8512												20.6957
				0.25			29
				1.75
				3.5			28
				5.5			27
				9.5			27.2
				19
				20.5			28.3
				29			26.1
