# Supplementary material for: Quantifying key drivers of marine pyrite burial flux and isotopic composition
Source: Research Square preprint supplement (doi:10.21203/rs.3.rs-4788953/v1), 2024-11-01
Supplement: Supplementary file 505 [file SB1.xlsx]

## Sheet: Sheet1
reference	latitude_dd	longitude_dd	water_depth_m	depth_cm	age_yr	porosity_vol_	SO4_mM	H2S_mM	CH4_mM	S_py_wt_	S_AVS_wt_	S0_wt_	TOC_wt_	Fe_HR_wt_	Fe_tot_wt_	d34S_SO4	d34S_H2S	d34S_py	lnSRR_molL_1d_1	sed_rate_cmky
Ku2008	13.7647	-60.9156	0.6	15.7746						0
				25.9155						0.303371
				40.5634						0.168539
				60.8451						0.286517
				70.4225						0.353933
				78.7313									0.316669
				72.6064									0
				64.8352									0.472779
				54.8902									0.978611
				40.2377									2.17588
				29.6596									0.857334
				20.4456									0.0880979
				10.1154									1.05018
