# Supplementary material for: Quantifying key drivers of marine pyrite burial flux and isotopic composition
Source: Research Square preprint supplement (doi:10.21203/rs.3.rs-4788953/v1), 2024-11-01
Supplement: Supplementary file 508 [file SB3.xlsx]

## Sheet: Sheet1
reference	latitude_dd	longitude_dd	water_depth_m	depth_cm	age_yr	porosity_vol_	SO4_mM	H2S_mM	CH4_mM	S_py_wt_	S_AVS_wt_	S0_wt_	TOC_wt_	Fe_HR_wt_	Fe_tot_wt_	d34S_SO4	d34S_H2S	d34S_py	lnSRR_molL_1d_1	sed_rate_cmky
Ku2008	13.7674	-60.9233	3	1.06032						0.166214
				6.97778						0.390548
				16.5651						1.4863
				26.8571						1.48297
				37.1365						1.51296
				1.15958														-31.1122
				7.09422														-29.1329
				17.2159														-31.2733
				27.6138														-33.9991
				37.4976														-29.2091
				1.52542									2.5044
				7.9661									2.46869
				12.7119									2.08119
				22.5424									1.97044
				27.9661									2.39235
