# Supplementary material for: Quantifying key drivers of marine pyrite burial flux and isotopic composition
Source: Research Square preprint supplement (doi:10.21203/rs.3.rs-4788953/v1), 2024-11-01
Supplement: Supplementary file 511 [file SB4.xlsx]

## Sheet: Sheet1
reference	latitude_dd	longitude_dd	water_depth_m	depth_cm	age_yr	porosity_vol_	SO4_mM	H2S_mM	CH4_mM	S_py_wt_	S_AVS_wt_	S0_wt_	TOC_wt_	Fe_HR_wt_	Fe_tot_wt_	d34S_SO4	d34S_H2S	d34S_py	lnSRR_molL_1d_1	sed_rate_cmky
Ku2008	13.7641	-60.9169	1	0.56338						0.0842697
				6.76056						0.337079
				62.8879						0.539326
				42.8169						0.539326
				56.9014						0.202247
				0.937098														-25.2931
				7.11219														-24.1088
				26.8292														-24.0117
				42.5973														-23.6456
				57.5096														-29.2091
