# Supplementary material for: Quantifying key drivers of marine pyrite burial flux and isotopic composition
Source: Research Square preprint supplement (doi:10.21203/rs.3.rs-4788953/v1), 2024-11-01
Supplement: Supplementary file 517 [file SBFIN.xlsx]

## Sheet: Sheet1
reference	latitude_dd	longitude_dd	water_depth_m	depth_cm	age_yr	porosity_vol_	SO4_mM	H2S_mM	CH4_mM	S_py_wt_	S_AVS_wt_	S0_wt_	TOC_wt_	Fe_HR_wt_	Fe_tot_wt_	d34S_SO4	d34S_H2S	d34S_py	lnSRR_molL_1d_1	lnMOR_molL_1d_1	sed_rate_cmky
Wehrmann2017	79.6497	11.2333	175	0												20.2381
				0.0788822						0.161134	0.127356	0.033966
				2.83186												20.2619
				3.0873						0.226562	0.121682	0.0398131
				5.80531												22.7857
				5.95709						0.268182	0.13492	0.0588675
				8.92035												21.1429
				9.03185						0.229302	0.077339	0.03454
				10.9027												21.4048
