# Supplementary material for: Quantifying key drivers of marine pyrite burial flux and isotopic composition
Source: Research Square preprint supplement (doi:10.21203/rs.3.rs-4788953/v1), 2024-11-01
Supplement: Supplementary file 520 [file SBFMID.xlsx]

## Sheet: Sheet1
reference	latitude_dd	longitude_dd	water_depth_m	depth_cm	age_yr	porosity_vol_	SO4_mM	H2S_mM	CH4_mM	S_py_wt_	S_AVS_wt_	S0_wt_	TOC_wt_	Fe_HR_wt_	Fe_tot_wt_	d34S_SO4	d34S_H2S	d34S_py	lnSRR_molL_1d_1	lnMOR_molL_1d_1	sed_rate_cmky
Wehrmann2017	79.6644	11.1917	132	0.0707965												20.5238
				0.148853						0.151633	0.127333	0.0103905
				2.90266												20.9524
				3.08598						0.141166	0.102815	0.033205
				6.0177												20.7857
				6.10529						0.187682	0.252798	0.047547
				8.84956												21.5
				9.11172						0.324177	0.077339	0.0656803
				12.0354												21.4048
