# Supplementary material for: Quantifying key drivers of marine pyrite burial flux and isotopic composition
Source: Research Square preprint supplement (doi:10.21203/rs.3.rs-4788953/v1), 2024-11-01
Supplement: Supplementary file 523 [file SBFOUT.xlsx]

## Sheet: Sheet1
reference	latitude_dd	longitude_dd	water_depth_m	depth_cm	age_yr	porosity_vol_	SO4_mM	H2S_mM	CH4_mM	S_py_wt_	S_AVS_wt_	S0_wt_	TOC_wt_	Fe_HR_wt_	Fe_tot_wt_	d34S_SO4	d34S_H2S	d34S_py	lnSRR_molL_1d_1	lnMOR_molL_1d_1	sed_rate_cmky
Wehrmann2017	79.7049	11.1097	214	0.0707965												20.7619
				0.148853						0.0947621	0.127333	0.0632106
				0.151899														-19.4231
				2.90266												20.8333
				3.09027						0.127016	0.164134	0.0652842
				5.89801						0.216095	0.2906	0.0937724
				5.9469												21.1429
				8.92035												21.4762
				9.05561						0.357329	0.33042	0.112845
				9.87342														-32.3077
				11.823												21.4048
				12.201						0.403755	0.368784	0.0234064
				14.9381												22.2619
				15.013						0.450159	0.556569	0.122657
				18.0531												22.0714
				18.2258						0.470642	0.470642	0.470642
				20.1266														-26.5385
				21.0265												22.119
				30.0759														-18.0769
