# Supplementary material for: Quantifying key drivers of marine pyrite burial flux and isotopic composition
Source: Research Square preprint supplement (doi:10.21203/rs.3.rs-4788953/v1), 2024-11-01
Supplement: Supplementary file 526 [file SJ96-22.xlsx]

## Sheet: Sheet1
reference	latitude_dd	longitude_dd	water_depth_m	depth_cm	age_yr	porosity_vol_	SO4_mM	H2S_mM	CH4_mM	S_py_wt_	S_AVS_wt_	S0_wt_	TOC_wt_	Fe_HR_wt_	Fe_tot_wt_	d34S_SO4	d34S_H2S	d34S_py	lnSRR_molL_1d_1	sed_rate_cmky
Aller2010	4.2226	-51.0538		4.24042			21.3757
				13.9408			22.448
				29.1884			28.179
				44.5218			28.8719
				68.5665			28.652
				84.0106			22.8563
				114.534			2.63891
				134.509			1.11978
				154.473			0.211331
				2.88023												20.5389
				11.1051												20.7115
				29.0803												23.2135
				44.4992												23.8895
				68.1496												23.909
				84.5876												25.7465
				114.283												41.5234
				134.717												58.1219
