# Supplementary material for: Quantifying key drivers of marine pyrite burial flux and isotopic composition
Source: Research Square preprint supplement (doi:10.21203/rs.3.rs-4788953/v1), 2024-11-01
Supplement: Supplementary file 535 [file SanPedroMatir.xlsx]

## Sheet: Sheet1
reference	latitude_dd	longitude_dd	water_depth_m	depth_cm	age_yr	porosity_vol_	SO4_mM	H2S_mM	CH4_mM	S_py_wt_	S_AVS_wt_	S0_wt_	TOC_wt_	Fe_HR_wt_	Fe_tot_wt_	d34S_SO4	d34S_H2S	d34S_py	lnSRR_molL_1d_1	lnMOR_molL_1d_1	sed_rate_cmky
Sweeney1980	28.2025	-112.477		9			23.1	0.4				0.62				28.2	-9
				19			19.9	0.6				0.837				31.1	11.7
				90			3.9	3.3				0.632				47.2	17.3
				123			2.9	2.6				0.286				24.6	23.2
				195			0.6	0.7				0.564				19.3	25.3
