# Supplementary material for: Quantifying key drivers of marine pyrite burial flux and isotopic composition
Source: Research Square preprint supplement (doi:10.21203/rs.3.rs-4788953/v1), 2024-11-01
Supplement: Supplementary file 538 [file U1317.xlsx]

## Sheet: Sheet1
reference	latitude_dd	longitude_dd	water_depth_m	depth_cm	age_yr	porosity_vol_	SO4_mM	H2S_mM	CH4_mM	S_py_wt_	S_AVS_wt_	S0_wt_	TOC_wt_	Fe_HR_wt_	Fe_tot_wt_	d34S_SO4	d34S_H2S	d34S_py	lnSRR_molL_1d_1	lnMOR_molL_1d_1	sed_rate_cmky
Wehrmann2015	51.4099	-11.5556	798	89.4569						0.0241546								-38.8034
				101.449												21.5385
				124.26			27.0667
				141.933									0.214486
				447.284						0.202899								-46.3248
				478.261												22.5641
				496.855					0.041506
				704.142			25.8667
				715.655						0.00483092								-33.3333
				739.13												22.906
				825.974									0.164993
				1057.97												23.9316
				1073.48						0.135266								-29.5726
				1103.82									0.330557
				1118.15					0.0385692
				1201.18			24.9333
				1699.68						0.352657								-17.265
				1710.77									0.905535
				1724.64												24.6154
				1739.64			23.2
				1988.17			22.6667
				2057.51						0.309179								-24.7863
				2072.46												25.2991
				2112.73									0.505116
				2153.65					0.0336746
				2623.19												26.3248
				2638.98						0.0772947								-29.9145
				2654.39									0.221625
				2775.15			21.6
				3086.26						0.120773								-30.9402
				3106.93									0.0357874
				3144.93												27.6923
				3189.33					0.073027
				3313.61			20.8
				3523.59									0.279256
				3578.27						0.241546								-34.0171
				3810.65			20.8
				3891.37						0.565217								-27.5214
				3927.54												27.6923
				3981.47									0.327559
				4536.23												28.3761
				4607.03						0.0193237								-30.9402
				4616.05									0.112264
				4721.89			19.8667
				4875.4						0.144928								-30.9402
				4887.18					0.0234939
				4893.01									0.238805
				4942.03												29.7436
				5456.87						0.0917874								15.8974
				5508.88			19.0667
				5576.6									0.1698
				5579.71												29.4017
				5798.82			17.8667
				5840.58												31.1111
				5922.85					0.0158584
				6396.17						0.425121								-4.95726
				6420.12			16.6667
				6478.26												32.8205
				6546.74									0.646838
				6792.9			15.4667
				6834.09					0.0115512
				6888.18						0.202899								9.40171
				6902.8									0.236711
				6913.04												33.8462
				7311.89									0.148479
				7335.46						0.111111								-4.95726
				7414.2			14.2667
				7434.78												34.5299
				7634.3									0.265217
				7662.49					0.00763553
				7662.72			13.2
				7738.02						0.164251								-26.1538
				7753.62												37.265
				8360.9									0.0790939
				8364.22						0.0821256								-30.9402
				8449.27												36.9231
				8449.7			12.6667
				8594.2												40.3419
				8738.12									0.595774
				8781.07			11.4667
				8811.5						0.0821256								7.69231
				8822.24					0.00215361
				9260.87												38.2906
				9296.72									1.05373
				9303.51						0.439614								-9.40171
				9370.92									0.302432
				9402.37			12.1333
				9661.34						0.21256								7.35043
				9666.67												43.7607
				9692.24					0.0422891
				9692.31			9.86667
				9736.11									0.292295
				10188.4												41.0256
				10190.4									0.184505
				10242.8						0.0821256								-11.1111
				10479.3			11.7333
				10520.7			8.53333
				10600.6						0.144928								-15.5556
				10607.3									0.437729
				10623.2												48.547
				10644.9					0.0377861
				11183.4			8
				11202.9												50.9402
				11216									1.09075
				11271.6						0.265701								-6.32479
				11584.7						0.188406								-22.735
				11637.7												54.0171
				11638.4					0.0996535
				11701.3									0.339028
				12121.4						0.207729								-14.5299
				12130.4												51.9658
				12160.6									0.445867
				12260.4			8.8
				12420.3												60.5128
				12568.7						0.140097								-14.188
				12569.9									0.367392
				12591.5					0.0156626
				12674.6			6.53333
				12942												61.1966
				13088.1					0.106506
				13130.2			6.13333
				13150.2						0.198068								-23.0769
				13323.6									1.37148
				13337.3			7.06667
				13608.7												63.2479
				13642.2						0.285024								-12.4786
				13671.2									0.590634
				13708.5					0.330677
				13792.9			5.46667
				13798.5									0.161234
				14704.1			3.73333
				14744.9					0.114337
				14768.1												69.0598
				14805.1						0.246377								-7.69231
				14859.5									0.618665
				15202.9												49.2308
				15220									0.403655
				15252.4						0.140097								-19.6581
				15284			6.13333
				15324.1					0.294066
				15789.1						0.202899								-16.9231
				15862.4									0.529815
				15943.9					0.650978
				15946.7			3.33333
				16130.4												62.5641
				16281.1						0.178744								-30.9402
				16319.4									0.539095
				16811.1					1.27455
				16817.9						0.178744								-28.2051
				16867.5									0.538524
				16899.4			1.6
				17238.1									0.762528
				17272.2			1.73333
				17309.9						0.400966								-26.4957
				17598.1					1.27827
				17643.1									0.498691
				17712.5						0.265701								-16.5812
				17852.1			2.26667
				18249.2						0.275362								-2.5641
				18266.3			2.13333
				18328.1									0.488222
				18630.5					2.03536
				18721.9			0.666667
				18741.2						0.545894								-4.95726
				18752.7									1.0829
				19705					2.61566
				19716			0.8
				19789.7									0.486699
				19814.7						0.275362								-26.4957
				20668.6			0.4
				20747.4									0.417408
				20798.7						0.502416								17.9487
				21983.1									0.523438
				22021.2					3.42307
				22185.3						0.381643								-13.8462
				22647.5					2.23134
				22677.3						0.36715								-4.61538
				22721.5									0.854376
				22863.9			1.2
				23270.4					1.83605
				23303.5						0.516908								-8.37607
				23307.1									0.49279
				24520.7			1.73333
				24633.9									0.588969
				24664.2					5.33821
				24690.1						0.545894								-3.93162
				24893.5			0.533333
				24904.9									0.452101
				24958.5						0.449275								-0.512821
				25369.5									0.79308
				25405.8						0.347826								-18.9744
				25782.8									0.890211
				25804.7			0.666667
				25808.3						0.429952								-11.7949
				26591.7			1.33333
				26605.5					6.67482
				26679.2									0.138057
				26702.9						0.391304								-17.265
				26822.2									0.401323
				26881.8						0.289855								0.289855
