# Supplementary material for: Quantifying key drivers of marine pyrite burial flux and isotopic composition
Source: Research Square preprint supplement (doi:10.21203/rs.3.rs-4788953/v1), 2024-11-01
Supplement: Supplementary file 541 [file U1385.xlsx]

## Sheet: Sheet1
reference	latitude_dd	longitude_dd	water_depth_m	depth_cm	age_yr	porosity_vol_	SO4_mM	H2S_mM	CH4_mM	S_py_wt_	S_AVS_wt_	S0_wt_	TOC_wt_	Fe_HR_wt_	Fe_tot_wt_	d34S_SO4	d34S_H2S	d34S_py	lnSRR_molL_1d_1	lnMOR_molL_1d_1	sed_rate_cmky
Turchyn2016	37.5714	-10.126	2585	37.3053		0.682499
				50.7391														-43.905
				90.3882			22.8935
				107.757					0.0384078
				128.462												21.6114
				192.241														-41.5694
				210.206		0.687025
				250.21												28.2925
				284.74			19.5898
				318.12														-44.1633
				410.561												28.3114
				426.828												31.7915
				441.418														-40.9604
				479.093			16.2861
				486.688		0.642426
				499.309			17.8566
				531.276														-42.6889
				568.717												33.2575
				601.769														-40.9415
				692.721			15.8752
				729.972												31.2476
				789.761		0.656097
				960.945												32.7241
				990.274			17.4486
				1050.16												32.4447
				1056.6					0.0214616
				1091.11		0.649831
				1137.68		0.689688
				1139.9			17.037
				1281.78												32.472
				1289.59			16.5427
				1413.37
				1524.67			15.9667
				1566.72												32.7955
				1635.66														-41.979
				1734.96
				1781.32			15.0603
				1815.12														-44.8564
				1833.45												33.9863
				1885.48														-42.8191
				1951.69			15.4754
				1970.83		0.598833
				2005.38					0.023799
				2045.19														-41.351
				2121.77		0.598767
				2190.3												32.869
				2271.52			15.7267
				2291.91														-35.235
				2401.56		0.59251
				2463.46			15.8114
				2617.91												32.9194
				2634.54			15.2347
				2664.02		0.635341
				2796.46												32.0709
				2810.41														-39.2318
				2869.5			14.824
				2954.22					0.00685285
				2955.91														-45.8813
				2960.88
				3114.97														-42.964
				3117.16												32.1087
				3177.17
				3204.57														-44.1129
				3381.45			14.9121
				3475.34
				3539.6														-36.2473
				3595.9			13.3442
				3613.71														-42.6154
				3724.72			12.1885
				3779.08		0.562768
				3808.15														-39.1142
				3812.28												31.6109
				3852.9			11.9419
				3863.92														-44.325
				3946.18					0.0099871
				4016.93
				4043.77												31.9281
				4058.87														-41.9832
				4067.82			9.71283
				4077.72														-44.2998
				4175.13			8.80489
				4238.07														-44.2809
				4240.19			7.31798
				4274.74												33.4046
				4297.12
				4326.38														-42.5314
				4354.4														14.5734
				4431.78			7.89854
				4452.78												33.7154
				4466.59														-37.2975
				4476.15			5.50231
				4487.64												35.4586
				4496.8														14.88
				4523.01												36.0425
				4553.48														-32.3597
				4576.51		0.557819
				4611.71												36.9226
				4626.96			3.43781
				4670.84														-15.8241
				4679.49														-35.2434
				4717.45												39.5437
				4718.09												38.0945
				4770.38														-39.2906
				4786.91												43.6099
				4841.82			1.29134
				4859.34
				4894.9					0.0116339
				4966.63
				5015.56												50.3035
				5162.65			0.13774
				5205.54
				5508.22
				5732.36					1.15144
				5738.59			0.226531
				5808.12
				5828.89
				6195.72
				6229.32			0.149123
				6452.23
				6675.62					2.94715
				6698.66			0.154132
				6754.64
				6864.31
				7182.46	0.00519872	0.519872
				7359.94			0.243834
				7465.69
				7636.34					6.07348
				7658.7
				7786.66			0.165743
				7814.53
