# Supplementary material for: Quantifying key drivers of marine pyrite burial flux and isotopic composition
Source: Research Square preprint supplement (doi:10.21203/rs.3.rs-4788953/v1), 2024-11-01
Supplement: Supplementary file 544 [file U1417.xlsx]

## Sheet: Sheet1
reference	latitude_dd	longitude_dd	water_depth_m	depth_cm	age_yr	porosity_vol_	SO4_mM	H2S_mM	CH4_mM	S_py_wt_	S_AVS_wt_	S0_wt_	TOC_wt_	Fe_HR_wt_	Fe_tot_wt_	d34S_SO4	d34S_H2S	d34S_py	lnSRR_molL_1d_1	lnMOR_molL_1d_1	sed_rate_cmky
Zindorf2019	56.96	-147.11	4200	57.8035			27.4101		0.00382293												14
				127								0.08	0.59	1.44	5.81						14
				387								0.19	0.61	1.39	5.91						14
				462.428			25.5755		0.00359355												14
				867.052			21.9065		0.00344759												14
				945								0.2	0.63	1.27	5.45						14
				1205								0.04	0.58	1.34	5.85						14
				1213.87			20.5576		0.00331552												14
				1387.28			19.3165		0.00433034												14
				1464								0.18	0.44	1.04	5.68						14
				1779								0.24	0.46	1.1	5.71						14
				1965.32			16.7266		0.00609583												14
				2027								0.18	0.43	1.17	5.39						14
				2196.53			15.8633		0.0039967												14
				2287								0.14	0.49	1.33	6.16						14
				2644								0.26	0.57	0.96	5.92			-40			14
				2886								0.13	0.34	1.06	6.11						14
				2890.17			14.4065		0.00388549												14
				3005.78			13.9748		0.000153												14
				3138								0.17	0.78	1.3	5.78						14
				3520								0.09	0.6	1.05	5.94						14
				3641.62			13.1115		0.00355185												14
				3759								0.16	0.57	1.25	5.85						14
				3872.83			12.7338		0.000466												14
				4019								0.15	0.56	1.28	6.15						14
				4232								0.18	0.5	1.19	6.15						14
				4455								0.22	0.6	1.09	6.01						14
				4566.47			11.6007		0.00693688												14
				4590								0.17	0.89	1.38	5.64						14
				4797.69			11.277		0.00098												14
				4839								0.18	0.39	0.99	6.05						14
				4850								0.16	0.51	0.94	5.75						14
				5214								0.15	0.6	1.27	6.01						14
				5227								0.12	0.68	1.13	5.85						14
				5375.72			11.0612		0.00104262												14
				5794								0.09	0.58	1.08	5.91						14
				5953.76			9.92806		0.00460837												14
				6039								0.16	0.61	1.19	5.41						14
				6290								0.12	0.53	0.95	5.9						14
				6693										0	5.43						14
				6941								0.79	0.66	1.44	5.79			-31.7			14
				6994.22			9.01079		0.00704809												14
				7196								0.24	0.42	0.83	5.47						14
				7834								0.03	0.49	0.85	4.89						14
				8034.68			7.66187		0.00244668												14
				8079								0.03	0.53	1.13	6.22						14
				8282								0.02	0.62	1.05	5.9						14
				8811								0.03	0.48	1.13	6.09						14
				8959.54			6.58273		0.0053938												14
				9054								0.07	0.5	1.11	6.26						14
				9302								0.03	0.56	1.1	5.91						14
				9777								0.35	0.56	0.76	5.24						14
				9942.2			5.98921		0.00414962												14
				10020								0.13	0.48	0.98	5.25						14
				10268								0.11	0.54	1.04	5.85						14
				10505								0.12	0.54	1.01	5.84						14
				10748								0.02	0.55	1.13	5.78						14
				10751.4			5.5036		0.000153												14
				10995								0.12	0.53	0.96	5.94						14
				11440								0.12	0.5	1.03	5.87						14
				11683								0.15	0.53	1.11	5.99						14
				11734.1			5.07194		0.00196707												14
				11930								0.11	0.59	1.05	5.71						14
				12312								0.1	0.45	0.99	6.45						14
				12312.1			4.42446		0.00184196												14
				12560								0.07	0.42	0.95	6.13						14
				12810								0.07	0.52	1.05	5.64						14
				13134								0.08	0.53	1	6.12						14
				13237			3.88489		0.00743038												14
				13375								0.16	0.42	0.99	5.6						14
				13627								0.2	0.51	0.94	5.87						14
				13981								0.12	0.49		5.76						14
				14324								0.2	0.55	0.98	5.91						14
				14403								0.09	0.46	0.99	5.88						14
				14663								0.03	0.22	0.55	5.04						14
				14682.1			2.91367		0.00332942												14
				14808								0.02	0.56	0.93	6.01						8
				14909								0.14	0.29	0.93	5.53						8
				15052								0.12	0.5	1.06	6						8
				15086.7			3.1295		0.00663799												8
				15203								0.08	0.37	0.81	5.38						8
				15279								0.06	0.37	0.83	5.67						8
				15527								0.11	0.31	1	6.21						8
				15780.3			2.91367		0.00320431												8
				15788								0.02	0.49	1	5.88						8
				15917								0.26	0.45	0.93	5.94						8
				16011.6			2.42806		0.00526869												8
				16029								0.15	0.31	0.9	5.65						8
				16169								0.1	0.44	0.95	5.75						8
				16294								0.13	0.5	0.96	5.87						8
				16400								0.1	0.2	0.77	5.82						8
				16504								0.14	0.51	1.12	6.25						8
				16514								0.13	0.53	1.1	5.78						8
				16531.8			2.69784		0.000341												8
				16531.8			2.10432		0.00369782												8
				16751								0.02	0.43	1.04	5.78						8
				17014								0.13	0.38	0.97	5.53						8
				17477								0.1	0.35	0.85	6.05						8
				17572.3			1.94245		6.95078e-05												8
				17724								0.18	0.28	0.92	6.12						8
				17988								0.09	0.4	0.78	5.81						8
				18354								0.12	0.46	1.1	5.83						8
				18439.3			1.56475		0.000166819												8
				18563								0.08	0.57	0.89	5.56						8
				18787								0.02	0.48	0.91	5.62						8
				19306.4			1.24101		0.000326687												8
				19310								0.12	0.25	0.92	6.01						8
				19418								0.12	0.39	1.06	5.78						8
				19638								0.26	0.38	1.02	5.97			-5			8
				19711			1.13309		0.000486555												8
				19858								0.1	0.38	0.93	5.74						8
				20082								0.02	0.42	0.9	6.01						8
				20578			1.24101		0.0012998												14
				20715								0.1	0.41	0.92	5.87						14
				20795								0.08	0.28	0.83	6.16						14
				20959								0.11	0.3	0.91	6.41						14
				21167								0.14	0.31	0.82	5.54						14
				21213.9			1.13309		0.00119553												14
				21599								0.05	0.45	1.21	5.69						14
				21686								0.09	0.33	1.14	6.25						14
				21791.9			0.917266		0.000646												14
				21802								0.12	0.48	1.17	5.93						14
				21903								0.08	0.46	0.98	5.97						14
				22165								0.12	0.48	1.08	5.99						14
				22214								0.05	0.42	1.15	6.39						14
				22254.3			1.13309		0.00148052												14
				24508.7			1.61871		0.000292												14
				24538								0.02	0.27	1.11	6.27						14
				24574								0.06	0.41	1.52	6.14			-9.5			14
				26444								0.04	0.41	1.2	6.11			-11.8			14
				26531.8			0.701439		0.0172866												14
				26560								0.02	0.44	1.07	6.25						14
				27383								0.02	0.35	1.13	6.44						14
				28262								0.02	0.36	0.92	5.57						14
				28786.1			1.56475		0.148024												14
				28800								0.05	0.3	1.06	6.62			51			8
				29385								0.07	0.23	0.9	6.32						8
				30599								0.16	0.49	1.21	5.9			-26.4			8
				30693.6			1.45683		0.236632												8
				31552								0.11	0.33	0.87	6.21			42.7			8
				31630								0.07	0.44	0.98	5.92			-32			8
				31676.3			0.809353		0.323121												8
				32580								0.18	0.39	0.9	6.2						6
				32716.8			0.755396		0.134372												6
				32745								0.11	0.19	0.53	5.27						6
				34566.5			0.755396		0.197771												6
				34651								0.13	0.23	0.56	5.34						6
				34840								0.11	0.24	1.16	6.23						6
				35631								0.31	0.33	1.01	5.6			-33.6			6
				36431								0.42	0.31	1.28	6.58			-36.1			4
				37563								0.04	0.27	0.54	3.57						4
				37572.3			1.24101		0.0302289												4
				37800								0.26	0.46	1.51	6.27			-15.9			4
				38358								0.14	0.36	1.34	6.5						4
				38713								0.38	0.37	1.57	6.93						4
				39338								0.2	0.37	1.07	5.54						4
				40126								0.04	0.33	1.15	5.85						4
				40231.2			0.917266		0.351654												6
				40332								0.03	0.26	0.67	4.49						6
				40346.8			1.78058		1.11381												6
				41083								0.07	0.55	1.47	6.34						6
				41156.1			1.02518		0.368607												6
				41290								0.11	0.5	0.79	6.22						6
				41850								0.14	0.2	0.67	6.29						6
				41882								0.07	0.19	0.3	3.64						6
				42123								0.05	0.12	0.48	5.22						6
				42125								0.03	0.15	0.49	5.19						6
				42196.5			1.83453		0.624319												6
				42312.1			1.34892		1.25406												6
				42426								0.14	0.42	1.26	5.69						6
				42436								0.19	0.46	1.29	6.16						6
				42829								0.19	0.15	0.86	6.27						6
				43095								0.27	0.7	0.81	4.88			-37.5			6
				43121.4			1.13309		0.429649												6
				43802								0.14	0.61	0.96	4.89						6
				44689								0.06	0.69	1.4	6.3			-20.6			6
