# Supplementary material for: Quantifying key drivers of marine pyrite burial flux and isotopic composition
Source: Research Square preprint supplement (doi:10.21203/rs.3.rs-4788953/v1), 2024-11-01
Supplement: Supplementary file 547 [file VMFIN.xlsx]

## Sheet: Sheet1
reference	latitude_dd	longitude_dd	water_depth_m	depth_cm	age_yr	porosity_vol_	SO4_mM	H2S_mM	CH4_mM	S_py_wt_	S_AVS_wt_	S0_wt_	TOC_wt_	Fe_HR_wt_	Fe_tot_wt_	d34S_SO4	d34S_H2S	d34S_py	lnSRR_molL_1d_1	lnMOR_molL_1d_1	sed_rate_cmky
Wehrmann2017	77.8337	16.566	67	0.912293						0.0463816	0.0001	0.0028169
				0.946904												20.0698
				2.99366												20.0427
				3.01792						0.0320426	0.0001	0.00657277
				5.89482						0.0271057	0.0001
				6.09656												19.8234
				8.77458												19.5096
				9.05276						0.033543	0.0001
				11.8886												20.076
				12.1405						0.0343111	0.0001
				14.7831												20.0952
				15.0879							0.0001
				17.895							0.0001
