# Supplementary material for: Quantifying key drivers of marine pyrite burial flux and isotopic composition
Source: Research Square preprint supplement (doi:10.21203/rs.3.rs-4788953/v1), 2024-11-01
Supplement: Supplementary file 550 [file VMFMID.xlsx]

## Sheet: Sheet1
reference	latitude_dd	longitude_dd	water_depth_m	depth_cm	age_yr	porosity_vol_	SO4_mM	H2S_mM	CH4_mM	S_py_wt_	S_AVS_wt_	S0_wt_	TOC_wt_	Fe_HR_wt_	Fe_tot_wt_	d34S_SO4	d34S_H2S	d34S_py	lnSRR_molL_1d_1	lnMOR_molL_1d_1	sed_rate_cmky
Wehrmann2017	77.8293	15.9926	31	0.0949367												20.8591		-17.8694
				0.140353						0.0255918	0.0018734	0.0028169
				2.94304												20.6186		-17.8694
				3.01759						0.038673	0.00169096	0.00187793
				6.03517						0.0271147	0.00149961	0.00187793
				6.07595												20.6186		-24.1237
				8.91174						0.0164862	0.00057	0.0028169
				9.11392												20.6186		-26.2887
				11.962												20.6186		-25.3265
				12.0703						0.0314451	0.00111692	0.0028169
				14.9479						0.0284129	0.00187785	0.00187793
				15.0949												22.0619		-28.0619
				17.895						0.0244284	0.000209	0.0244284
				17.943														-26.5292
