# Supplementary material for: Quantifying key drivers of marine pyrite burial flux and isotopic composition
Source: Research Square preprint supplement (doi:10.21203/rs.3.rs-4788953/v1), 2024-11-01
Supplement: Supplementary file 556 [file Vy20-3205_EXAMPLE.xlsx]

## Sheet: Sheet1
reference	latitude_dd	longitude_dd	water_depth_m	depth_cm	age_yr	porosity_vol_	SO4_mM	H2S_mM	CH4_mM	S_py_wt_	S_AVS_wt_	S0_wt_	TOC_wt_	Fe_HR_wt_	Fe_tot_wt_	d34S_SO4	d34S_H2S	d34S_py	lnSRR_molL_1d_1	sed_rate_cmky
Lein2009	-17.1	9.685	4180	0	0
				1	78.74		13.586						1.15					-22.8
				1.5	118.11				0.00228699				1.525
				2	157.48								1.15
				3	236.22		13.586		0.00228699				1.06
				6	472.44
				10	787.4		11.975		0.005426				0.78					-36	-5.04462
				22	1732.28								0.8
				22.5	1771.65								0.8
				27.5	2165.35
				50	3937.01
				60	4724.41		14.123		0.0229596				1.05					-41.5	-3.21203
				62.5	4921.26
				75	5905.51		13.049		0.0301345				1.7					-42.5
				97.5	7677.17		14.123		0.0331838				2.4					-42.6	-4.35147
				102	8031.5								2.4
				102.5	8070.87								2.4
				112.5	8858.27
				140	11023.6		13.586		0.0361434				1.72					-40.8	-4.485
				157.5	12401.6								5.15
				158	12440.9								5.15
				165	12992.1				0.057399				4.95					-39.1	-2.30477
				167.5	13189
				195	15354.3				0.0932733
				600	47244.1
