# Supplementary material for: Quantifying key drivers of marine pyrite burial flux and isotopic composition
Source: Research Square preprint supplement (doi:10.21203/rs.3.rs-4788953/v1), 2024-11-01
Supplement: Supplementary file 559 [file W1999_CK.xlsx]

## Sheet: Sheet1
reference	latitude_dd	longitude_dd	water_depth_m	depth_cm	age_yr	porosity_vol_	SO4_mM	H2S_mM	CH4_mM	S_py_wt_	S_AVS_wt_	S0_wt_	TOC_wt_	Fe_HR_wt_	Fe_tot_wt_	d34S_SO4	d34S_H2S	d34S_py	lnSRR_molL_1d_1	lnMOR_molL_1d_1	ExtraVar1	ExtraVar2	ExtraVar3	ExtraVar4	ExtraVar5	ExtraVar6	ExtraVar7	ExtraVar8	ExtraVar9	ExtraVar10	ExtraVar11	ExtraVar12	ExtraVar13	sed_rate_cmky
Walter1999	25.0404	-80.6417	1	0			18.3									19.6
				1			18.3									21.2
				3			18.5									22.7
				5			18.4
				7			18.4
				11			18.7	0.31								19.7
				13			19.2	0.38								22.6	-22.2
				15			19.3	0.16
				19			20.2	0.53								25.1	-20.9
				21			20.9	0.39								21.3	-19.2
				23			21.6	0.42								26.6	-19.3
