# Supplementary material for: Quantifying key drivers of marine pyrite burial flux and isotopic composition
Source: Research Square preprint supplement (doi:10.21203/rs.3.rs-4788953/v1), 2024-11-01
Supplement: Supplementary file 562 [file W1999_SK.xlsx]

## Sheet: Sheet1
reference	latitude_dd	longitude_dd	water_depth_m	depth_cm	age_yr	porosity_vol_	SO4_mM	H2S_mM	CH4_mM	S_py_wt_	S_AVS_wt_	S0_wt_	TOC_wt_	Fe_HR_wt_	Fe_tot_wt_	d34S_SO4	d34S_H2S	d34S_py	lnSRR_molL_1d_1	lnMOR_molL_1d_1	sed_rate_cmky
Walter1999	24.9174	-80.6654	1	0			25.7									19.9
				1			26.2	0.15								17.7
				3			26.5									19.6
				5			26.7	0.11
				7			26.8	0.07
				9			27	0.11								20.5
				13			27.6	0.12
				17			27.5									20.7
				19			27.7									21.7
				21			27.5	0.13								22.4
				23			28.2	0.14								23.2
