# Supplementary material for: Quantifying key drivers of marine pyrite burial flux and isotopic composition
Source: Research Square preprint supplement (doi:10.21203/rs.3.rs-4788953/v1), 2024-11-01
Supplement: Supplementary file 565 [file W1999_TK.xlsx]

## Sheet: Sheet1
reference	latitude_dd	longitude_dd	water_depth_m	depth_cm	age_yr	porosity_vol_	SO4_mM	H2S_mM	CH4_mM	S_py_wt_	S_AVS_wt_	S0_wt_	TOC_wt_	Fe_HR_wt_	Fe_tot_wt_	d34S_SO4	d34S_H2S	d34S_py	lnSRR_molL_1d_1	lnMOR_molL_1d_1	ExtraVar1	ExtraVar2	ExtraVar3	ExtraVar4	ExtraVar5	ExtraVar6	ExtraVar7	ExtraVar8	ExtraVar9	ExtraVar10	ExtraVar11	ExtraVar12	sed_rate_cmky
Walter1999	24.9994	-80.5054	10	0			27.9									20.7
				1			26.6	0.17								21.9
				3			27									21.1
				5			27.1	0.15
				7			27.4	0.04								21.3
				9			27.5
				11			27.5									21.2
				13			27.4
				15			27.5									19.9
				17			27.4
				19			27.7
				21			27.3									21.2
				23			27	0.04								21.6
