# Supplementary material for: Quantifying key drivers of marine pyrite burial flux and isotopic composition
Source: Research Square preprint supplement (doi:10.21203/rs.3.rs-4788953/v1), 2024-11-01
Supplement: Supplementary file 568 [file W2001_10.xlsx]

## Sheet: Sheet1
reference	latitude_dd	longitude_dd	water_depth_m	depth_cm	age_yr	porosity_vol_	SO4_mM	H2S_mM	CH4_mM	S_py_wt_	S_AVS_wt_	S0_wt_	TOC_wt_	Fe_HR_wt_	Fe_tot_wt_	d34S_SO4	d34S_H2S	d34S_py	lnSRR_molL_1d_1	lnMOR_molL_1d_1	sed_rate_cmky
Wijsman2001	44.1797	30.0922	72	0.219427			15.868
				0.27462			15.5041	0.00380983
				1.38477			14.9225	0.00320828
				2.07401			16.1406
				3.46985			15.7543	0.00263277
				4.367			16.4862
				5.84271			16.4407
				7.73124			15.9095	0.00268485										-45.4834
				10.0166			16.5471	0.00338796										-46.2758
				14.6937			16.7032											-45.3249
				19.7774			16.4222	0.00422389										-45.0079
				24.9668			16.4334											-44.5325
				0.25						0.001				0.28	1.47
				0.75						0.001				0.28	1.51
				1.5						0.004	0.001			0.08	1.69
				2.5						0.004	0.002			0.04	1.26
				3.5						0.008	0.001			0.03	1.22
				4.5						0.036	0.001			0.04	0.85
				6						0.059	0.001			0.06	0.71
				8						0.227	0.001			0.21	1.06
				10						0.54	0.001			0.48	1.11
				15						0.312	0.001			0.28	1.19
				20						0.432	0.002			0.39	2.55
				25						0.247	0.002			0.22	1.27
