# Supplementary material for: Quantifying key drivers of marine pyrite burial flux and isotopic composition
Source: Research Square preprint supplement (doi:10.21203/rs.3.rs-4788953/v1), 2024-11-01
Supplement: Supplementary file 577 [file W2001_19.xlsx]

## Sheet: Sheet1
reference	latitude_dd	longitude_dd	water_depth_m	depth_cm	age_yr	porosity_vol_	SO4_mM	H2S_mM	CH4_mM	S_py_wt_	S_AVS_wt_	S0_wt_	TOC_wt_	Fe_HR_wt_	Fe_tot_wt_	d34S_SO4	d34S_H2S	d34S_py	lnSRR_molL_1d_1	lnMOR_molL_1d_1	sed_rate_cmky
Wijsman2001	44.3619	30.8376	120	0.120968			15.868	0.142623
				0.604839			15.5041	0.134016
				1.45161			14.9225	0.134016
				2.54032			15	0.131557
				3.26613			15.7543	0.13709
				4.59677			15	0.137356
				5.80645			16.4407	0.144467
				8.22581			14.9	0.135246
				9.79839			14.9	0.135246
				14.879			14	0.130328
				19.8387			15	0.134016
				0.25						0.011				1.67
				0.75						0.004				1.94
				1.5						0.007				0.61
				2.5						0.004				0.4
				3.5						0.004	0.001			0.18
				4.5						0.026	0.001			0.11
				6						0.08				0.13
				8						0.392	0.001			0.38
				10						0.76	0.001			0.71
				15						0.96	0.001			0.86
				20						0.783	0.001			0.69
