# Supplementary material for: Quantifying key drivers of marine pyrite burial flux and isotopic composition
Source: Research Square preprint supplement (doi:10.21203/rs.3.rs-4788953/v1), 2024-11-01
Supplement: Supplementary file 580 [file W2001_2.xlsx]

## Sheet: Sheet1
reference	latitude_dd	longitude_dd	water_depth_m	depth_cm	age_yr	porosity_vol_	SO4_mM	H2S_mM	CH4_mM	S_py_wt_	S_AVS_wt_	S0_wt_	TOC_wt_	Fe_HR_wt_	Fe_tot_wt_	d34S_SO4	d34S_H2S	d34S_py	lnSRR_molL_1d_1	lnMOR_molL_1d_1	sed_rate_cmky
Wijsman2001	44.0432	28.7985	26	0.401759			13.9012	0.0139012										-13.3465
				1.00639			15.3281	0.0153281
				1.24727			14.4346	0.0144346										-10.906
				2.62801			13.7166	0.0137166
				3.45851			15.0822	0.0150822										-16.9374
				4.90067			13.1153	0.0131153										-21.0656
				6.03979			13.0518	0.0130518										-20.1066
				7.94698			11.9158	0.0119158										-13.2145
				10.3423			12.6245	0.0126245										-10.4538
				14.7833			10.7078	0.0107078										-10.2244
				20.0975			10.5111	0.0105111										-7.13513
				25.1743			10.0847	0.0100847
				0.25						0.052	0.001			0.64
				0.75						0.049	0.001			0.54
				1.5						0.058	0.013			0.4
				2.5						0.063	0.053			0.3
				3.5						0.087	0.118			0.29
				4.5						0.259	0.154			0.44
				6						0.366	0.153			0.51
				8						0.524	0.492			0.9
				10						0.54	0.238			0.72
				15						0.06	0.303			0.41
				20						0.073	0.166			0.41
				25						0.045	0.276			0.5
				30						0.027	0.052			0.17
