# Supplementary material for: Quantifying key drivers of marine pyrite burial flux and isotopic composition
Source: Research Square preprint supplement (doi:10.21203/rs.3.rs-4788953/v1), 2024-11-01
Supplement: Supplementary file 583 [file W2001_22.xlsx]

## Sheet: Sheet1
reference	latitude_dd	longitude_dd	water_depth_m	depth_cm	age_yr	porosity_vol_	SO4_mM	H2S_mM	CH4_mM	S_py_wt_	S_AVS_wt_	S0_wt_	TOC_wt_	Fe_HR_wt_	Fe_tot_wt_	d34S_SO4	d34S_H2S	d34S_py	lnSRR_molL_1d_1	lnMOR_molL_1d_1	sed_rate_cmky
Wijsman2001	43.2987	30.9046	1494	0.0204606			16.6527
				0.120968			17.8718	0.00245902
				0.967742				0.0497951
				1.44518			17.5874	0.119262										-37.9556
				2.33251			15.9408	0.114344										-38.2726
				3.53821			16.517	0.103893										-38.2726
				4.02377			17.4497	0.1125										-38.5895
				6.0299			17.4533	0.122951										-38.8273
				7.54604			17.4572	0.0848361										-38.4311
				9.12847			16.887	0.0461066
				14.8252			18.8346	0.039959
				20.0806			17.5	0.0387295
				25.0329			17.9959
				0.25						0.734	0.038			0.66	1.75
				0.75						1.079	0.05			0.97	1.98
				1.5						1.042	0.055			0.92	2.18
				2.5						0.946	0.016			0.83	1.86
				3.5						1.092	0.019			0.95	2.14
				4.5						1.266	0.019			1.11	2.58
				6						1.065	0.013			0.93	2.09
				8						1.226	0.018			1.07	2.05
				10						0.621	0.01			0.54	0.94
				15						0.951	0.01			0.84	1.67
				20											1.64
				25											1.35
