# Supplementary material for: Quantifying key drivers of marine pyrite burial flux and isotopic composition
Source: Research Square preprint supplement (doi:10.21203/rs.3.rs-4788953/v1), 2024-11-01
Supplement: Supplementary file 586 [file W2001_24.xlsx]

## Sheet: Sheet1
reference	latitude_dd	longitude_dd	water_depth_m	depth_cm	age_yr	porosity_vol_	SO4_mM	H2S_mM	CH4_mM	S_py_wt_	S_AVS_wt_	S0_wt_	TOC_wt_	Fe_HR_wt_	Fe_tot_wt_	d34S_SO4	d34S_H2S	d34S_py	lnSRR_molL_1d_1	lnMOR_molL_1d_1	sed_rate_cmky
Wijsman2001	44.0334	30.4168	137	0.0122829			17.8169	0
				0.963766			17.8868
				1.45161			17.6694	0
				2.67679			18.8184
				3.50806			17.4497	0.000617
				6.16936			20.1778	0.000617										-45.6418
				7.91674			18.1598											-45.8796
				9.96678			18.587	0.00123457										-40.6498
				14.9502			17.2815											-21.7908
				19.8649			17.6308											-11.8859
				20.2016			19.3906	0
				25.1163			16.8998											-5.86371
				0.25						0.018				0.05	1.05
				0.75						0.003				0.02	1.21
				1.5						0.003	0.001			0.01	1.49
				2.5						0.001				0.01	1.31
				3.5						0.006				0.01	1.97
				4.5						0.049	0.001			0.06	2.1
				6						0.22	0.001			0.2	2.63
				8						0.383	0.001			0.34	1.88
				10						0.469	0.001			0.41	1.86
				15						0.677	0.003			0.6	2.4
				20						0.587	0.004			0.52	2.9
				25						0.556	0.008			0.49	2.83
