# Supplementary material for: Quantifying key drivers of marine pyrite burial flux and isotopic composition
Source: Research Square preprint supplement (doi:10.21203/rs.3.rs-4788953/v1), 2024-11-01
Supplement: Supplementary file 592 [file W2001_9.xlsx]

## Sheet: Sheet1
reference	latitude_dd	longitude_dd	water_depth_m	depth_cm	age_yr	porosity_vol_	SO4_mM	H2S_mM	CH4_mM	S_py_wt_	S_AVS_wt_	S0_wt_	TOC_wt_	Fe_HR_wt_	Fe_tot_wt_	d34S_SO4	d34S_H2S	d34S_py	lnSRR_molL_1d_1	lnMOR_molL_1d_1	sed_rate_cmky
Wijsman2001	44.5667	29.7667	57	0.0332452			14.3546	0
				0.819161			14.7177
				1.67157			15.0808	0
				2.34219			15.6626											-38.4311
				3.8622			15.8059	0.000619835
				4.48505			16.0233											-41.2837
				5.8804			15.7279	0.000619835										-42.5515
				7.97342			15.2126											-43.5816
				9.67742				0.000619835
				10.0494			14.6245											-44.5325
				15.1495			16.2191											-44.0571
				19.7177			16.2809	0										-44.2948
				24.9668			14.0797											-42.8685
				29.6371				0										-41.8384
				0.25						0.014	0.021			0.12
				0.75						0.023	0.022			0.1	1.57
				1.5						0.032	0.041			0.2	2.41
				2.5						0.055	0.057			0.2	3.43
				3.5						0.19	0.048			0.29	3.79
				4.5						0.288	0.024			0.33	2.63
				6						0.3	0.014			0.32	2.27
				8						0.294	0.007			0.3	2
				10						0.453	0.005			0.44	2.86
				15						0.779	0.003			0.69	3.31
				20						0.436	0.002			0.39	2.02
				25						0.678	0.005			0.61	3.63
				30						0.628	0.006			0.56
