# Supplementary material for: Quantifying key drivers of marine pyrite burial flux and isotopic composition
Source: Research Square preprint supplement (doi:10.21203/rs.3.rs-4788953/v1), 2024-11-01
Supplement: Supplementary file 595 [file W2014_AB.xlsx]

## Sheet: Sheet1
reference	latitude_dd	longitude_dd	water_depth_m	depth_cm	age_yr	porosity_vol_	SO4_mM	H2S_mM	CH4_mM	S_py_wt_	S_AVS_wt_	S0_wt_	TOC_wt_	Fe_HR_wt_	Fe_tot_wt_	d34S_SO4	d34S_H2S	d34S_py	lnSRR_molL_1d_1	lnMOR_molL_1d_1	sed_rate_cmky
Wehrmann2014	77.5862	15.0767	101	0.210526										1.875
				0.398889														-16.8314
				0.5						0.04	0
				1.75265			26.5525
				2.44851														-18.1049
				2.5						0.05	0
				2.52632										1.83468
				3.74962			25.6695
				4.23582														-20.6453
				4.5						0.05	0
				4.63158										1.93548
				6.29086														-20.6513
				6.5						0.04	0.01
				6.52632										1.35081
				7.75535			25.6594
				8.5						0.06	0.02
				8.6046														-20.2354
				9.26316										1.54234
				9.87724														-22.9856
				10.1892			25.9167
				10.5						0.04	0.01
				11.1579										1.36089
				12										1.63306
				12.4705			24.7696
				12.5						0.05	0.02
				14.2442														-22.9983
				14.5						0.14	0.02
				14.7368										1.72379
				16.5						0.08	0.02
				16.8421										1.67339
				17.5719														-25.7544
				17.6254			25.4589
				18.5						0.08	0.04
				18.5263										1.66331
				20.5						0.05	0
				20.8421										1.48185
				21.6317			25.5366
				21.947														-23.8656
				30.1708														-23.0444
				30.3158										1.57258
				30.5						0.04	0.01
				33.5012														-25.1667
				34.7822			23.8353
				37.861														-26.8695
				38.3158										1.88508
				38.5						0.07	0.01
				41.9417			24.783
				45.8279														-26.0475
				50.2021														-24.37
				54.5						0.09	0.01
				54.5263										1.94556
				57.648														-25.2366
				57.8133			23.5138
				65.8528														-28.8519
				66.3158										1.49194
				66.5						0.11	0.03
				74.5						0.07	0.01
				74.5263										1.58266
				74.6058														-24.4407
				78.5						0.07	0.02
				79.5789										1.5121
