# Supplementary material for: Quantifying key drivers of marine pyrite burial flux and isotopic composition
Source: Research Square preprint supplement (doi:10.21203/rs.3.rs-4788953/v1), 2024-11-01
Supplement: Supplementary file 598 [file W2014_AC.xlsx]

## Sheet: Sheet1
reference	latitude_dd	longitude_dd	water_depth_m	depth_cm	age_yr	porosity_vol_	SO4_mM	H2S_mM	CH4_mM	S_py_wt_	S_AVS_wt_	S0_wt_	TOC_wt_	Fe_HR_wt_	Fe_tot_wt_	d34S_SO4	d34S_H2S	d34S_py	lnSRR_molL_1d_1	lnMOR_molL_1d_1	sed_rate_cmky
Wehrmann2014	77.5527	15.654	66	1.54696														-18.6316
				1.745			25.4112
				2.10526										1.48185
				2.5						0.05	0
				4.21053										1.57258
				4.5						0.03	0
				5.15654														-22
				6.46779			25.6627
				6.5						0.04	0
				6.7035														-19.2632
				6.73684										1.40121
				8.32229			24.8679
				8.5						0.05	0
				9.28177														-21.5789
				9.68421										1.42137
				10.4776			26.2671
				10.5						0.09	0.01
				10.8287														-18.4211
				12.0507			26.1753
				12.4211										0.957661
				12.5						0.09	0
				13.6648														-21.7895
				14.3158										1.39113
				14.3344			25.3794
				14.5						0.1	0
				15.7274														-18
				16.3396			25.7255
				16.5						0.1	0
				16.6316										1.35081
				18.0617			26.5113
				18.5						0.07	0
				18.9474										1.70363
				19.337														-16.1053
				19.7737			25.8047
				20.4211										1.41129
				20.5						0.11	0
				23.6352			25.6193
				24.5						0.08	0
				24.6316										1.45161
				26.4964			25.6121
				28.4211										1.29032
				28.5						0.1	0
				31.1971														-18.4211
				31.9322			25.5106
				32										1.35081
				32.5						0.1	0
				36.2105										1.48185
				36.5						0.08	0
				37.1271														-18.6316
				37.7994			25.7591
				40.4211										1.29032
				40.5						0.12	0.01
				43.3149														-17.3684
				45.9551			25.9141
				48.5						0.1	0
				48.8421										1.28024
				49.2449														-18.6316
				49.8219			26.5189
				55.175														-17.5789
				56.4211										1.60282
				56.5						0.16	0
				61.6206														-17.7895
				64.4211										1.42137
				64.5						0.14	0
				65.7017			26.4788
				68.0663														-17.7895
				72.5						0.12	0
				72.6316										1.29032
				73.9975			26.1945
				80.5						0.09	0
				81.0526										1.42137
