# Supplementary material for: Quantifying key drivers of marine pyrite burial flux and isotopic composition
Source: Research Square preprint supplement (doi:10.21203/rs.3.rs-4788953/v1), 2024-11-01
Supplement: Supplementary file 601 [file W2014_GK.xlsx]

## Sheet: Sheet1
reference	latitude_dd	longitude_dd	water_depth_m	depth_cm	age_yr	porosity_vol_	SO4_mM	H2S_mM	CH4_mM	S_py_wt_	S_AVS_wt_	S0_wt_	TOC_wt_	Fe_HR_wt_	Fe_tot_wt_	d34S_SO4	d34S_H2S	d34S_py	lnSRR_molL_1d_1	lnMOR_molL_1d_1	sed_rate_cmky
Wehrmann2014	79.6415	11.3493	178	0.258866			25.6768
				0.843882										0.543912
				0.980716														-18.3486
				1						0.01	0
				2.50702			24.6807
				2.68853														-25.2952
				3						0.02	0.01
				3.16456										0.623753
				4.85024														-26.5163
				5						0.07	0.04
				5.06329										0.803393
				6.32911										0.963074
				6.35669														-29.2404
				7						0.06	0.02
				7.36972			27.0327
				8.61427			22.4847
				8.9625														-27.4496
				9						0.07	0.01
				9.07173										0.933134
				10.2411			23.8613
				10.5485										0.603792
				10.8956														-31.9858
				11						0.06	0.02
				12.0253										0.703593
				13						0.07	0.01
				13.924										0.753493
				15						0.05	0.03
				16.2447										0.723553
				17						0.11	0.02
				18.3544										0.733533
				81.9969
