# Supplementary material for: Quantifying key drivers of marine pyrite burial flux and isotopic composition
Source: Research Square preprint supplement (doi:10.21203/rs.3.rs-4788953/v1), 2024-11-01
Supplement: Supplementary file 604 [file W2014_GN.xlsx]

## Sheet: Sheet1
reference	latitude_dd	longitude_dd	water_depth_m	depth_cm	age_yr	porosity_vol_	SO4_mM	H2S_mM	CH4_mM	S_py_wt_	S_AVS_wt_	S0_wt_	TOC_wt_	Fe_HR_wt_	Fe_tot_wt_	d34S_SO4	d34S_H2S	d34S_py	lnSRR_molL_1d_1	lnMOR_molL_1d_1	sed_rate_cmky
Wehrmann2014	79.7502	11.0998	198	0														-39.8947
				0.597704			27.4824
				0.920973										0.5855
				1						0.03	0
				2.09032			26.6916
				2.3166														-43.0526
				2.83732										0.675855
				3						0.05	0.01
				3.93822														-40.8421
				4.33678										0.816836
				4.44037			25.8975
				5						0.07	0.02
				6.36696			25.6285
				6.44681										0.76572
				6.94981														-41.7895
				7				0.0243902		0.11	0.05
				8.30539			26.5374
				8.78645										0.855953
				9						0.16	0.05
				9.26641														-42.7368
				10.6633			26.5286							0.724093
				11						0.2	0.04
				11.6129				0.0243902
				11.7259			25.6084
				11.8147														-41.7895
				12.5922										0.824549
				13						0.19	0.04
				13.8682			25.4695
				14.8972										0.642064
				15						0.19	0.03
				15.4839				0.0634146
				16.2162			25.0681											-42.1053
				17						0.17	0.03			0.590949
				18.7119										0.681365
				19						0.19	0.04
				19.7849				0.136585
				20.0661			23.614
				21.3127														-44.3158
				23						0.21	0.04
				23.3732			24.123							0.72042
				25.9459														-43.3684
				26.9494										0.547669
				27						0.16	0.01
				27.5269				0.156098
				28.4222			23.1901
				30.3511										0.667897				-42.7368
				31						0.19	0.04
				34.398										0.868747
				35						0.2	0.09
				35.444														-42.7368
				36.1443			23.6847
				36.3441				0.317073
				39						0.22	0.07
				39.2286										0.57442
				40.8549			23.1435
				45.4054														-40.5263
				47				0.365854		0.21	0.03			0.612497
				48.777			22.1977
				54.6718														-35.1579
				56.0152			17.1971
				58						0.29	0.02
				58.51										0.74056
				63.871			14.8117	1.05854
				64.4015														-39.5789
				72.0315			11.1167
				73.8996														-36.4211
