# Supplementary material for: Quantifying key drivers of marine pyrite burial flux and isotopic composition
Source: Research Square preprint supplement (doi:10.21203/rs.3.rs-4788953/v1), 2024-11-01
Supplement: Supplementary file 607 [file W2014_HA.xlsx]

## Sheet: Sheet1
reference	latitude_dd	longitude_dd	water_depth_m	depth_cm	age_yr	porosity_vol_	SO4_mM	H2S_mM	CH4_mM	S_py_wt_	S_AVS_wt_	S0_wt_	TOC_wt_	Fe_HR_wt_	Fe_tot_wt_	d34S_SO4	d34S_H2S	d34S_py	lnSRR_molL_1d_1	lnMOR_molL_1d_1	sed_rate_cmky
Wehrmann2014	77.534	15.8377	28	0.842105										2.35887
				1						0.1	0
				1.28676														-18.0986
				1.45358			24.6218
				3						0.09	0
				3.15789										2.00605
				3.60294														-18.5211
				4.24327			24.6148
				4.84211										1.62298
				5						0.06	0
				5.14706														-16.4085
				6.94737										1.49194
				7						0.09	0
				7.20588														-17.8873
				8.42105										1.59274
				9						0.05	0
				10.2554			25.1264
				10.7368										1.86492
				11						0.03	0
				11.0662														-19.1549
				11.9704			24.8587
				12.8421										1.70363
				13						0.04	0
				14.3291			24.5893
				14.7368										1.50202
				15						0.04	0
				17						0.04	0
				17.0526										1.52218
				18.0147														-20.8451
				18.7368										1.37097
				19						0.05	0
				22.9474										1.54234
				23						0.05	0
				23.7827			26.2774
				24.1912														-19.7887
				27						0.04	0
				27.1579										1.65323
				27.2223			27.1905
				30.3676														-20.8451
				30.7368										1.5625
				31						0.07	0
				31.9416			26.9152
				35						0.05	0
				35.3803			27.6967
				35.5789										1.68347
				37.8309														-20.8451
				38.9474										1.38105
				39						0.09	0
				40.4044														-19.3662
				43.5287			26.7543
				44.7794														-18.9437
				46.9474										1.45161
				47						0.12	0
				47.3993			27.9297
				47.8676														-18.9437
				51.4686			26.7342
				53.5294														-18.3099
				54.5263										1.12903
				55						0.05	0
				55.7684			27.9086
				59.4485														-17.4648
				62.7368										1.39113
				63						0.11	0
				63.7021			26.9667
				64.8529														-17.2535
				67.7864			28.0099
				70.7721														-18.5211
				71						0.1	0
				71.0062			28.1334
				71.1579										1.55242
				75.5144			28.3854
				78.2353														-17.4648
				78.5134			27.5877
				79						0.11	0
				79.3684										1.64315
				83.8971														-17.4648
				88.1709			27.695
				89.3015														-15.5634
				95.2206														-17.2535
				95.6826			27.8078
				101.912														-16.6197
				107.574														-18.9437
				113.235														-18.7324
				119.154														-17.2535
				125.331														-17.8873
				131.765														-17.8873
				137.684														-17.8873
