# Supplementary material for: Quantifying key drivers of marine pyrite burial flux and isotopic composition
Source: Research Square preprint supplement (doi:10.21203/rs.3.rs-4788953/v1), 2024-11-01
Supplement: Supplementary file 610 [file W2014_HB.xlsx]

## Sheet: Sheet1
reference	latitude_dd	longitude_dd	water_depth_m	depth_cm	age_yr	porosity_vol_	SO4_mM	H2S_mM	CH4_mM	S_py_wt_	S_AVS_wt_	S0_wt_	TOC_wt_	Fe_HR_wt_	Fe_tot_wt_	d34S_SO4	d34S_H2S	d34S_py	lnSRR_molL_1d_1	lnMOR_molL_1d_1	sed_rate_cmky
Wehrmann2014	79.0345	11.702	170	0.552486														-18.8889
				0.655022			27.4477
				1						0.03	0
				1.26489										0.828616
				2.75479										0.989615
				2.83843			27.4477
				3						0.05	0.01
				4.41989														-27.7778
				4.76616										1.0403
				5						0.05	0.01
				6.78056										1.0709
				6.90608														-25.5556
				6.9869			25.5732
				7						0.05	0.01
				8.83978														-21.4286
				8.95197			26.3766
				9						0.05	0.02
				9.55968										1.05149
				10.221														-28.4127
				11
				11.1354			26.3766
				13.1004			25.9749
				14.8472			26.7782
				15						0.08	0
				17						0.05	0.03
				17.2489			26.7782
				17.6188										1.16386
				18.1677										0.872827
				19						0.09	0.05
