# Supplementary material for: Quantifying key drivers of marine pyrite burial flux and isotopic composition
Source: Research Square preprint supplement (doi:10.21203/rs.3.rs-4788953/v1), 2024-11-01
Supplement: Supplementary file 613 [file W2014_IA.xlsx]

## Sheet: Sheet1
reference	latitude_dd	longitude_dd	water_depth_m	depth_cm	age_yr	porosity_vol_	SO4_mM	H2S_mM	CH4_mM	S_py_wt_	S_AVS_wt_	S0_wt_	TOC_wt_	Fe_HR_wt_	Fe_tot_wt_	d34S_SO4	d34S_H2S	d34S_py	lnSRR_molL_1d_1	lnMOR_molL_1d_1	sed_rate_cmky
Wehrmann2014	78.8958	12.337	57	0.5						0.04	0
				0.986678										0.999232
	0.895833	0.337		2.5						0.03	0
				4.5						0.04	0
				4.79808										0.829463
				6.5						0.05	0
				8.5						0.05	0
				9.33468										0.87071
				10.5						0.05	0
				12.3601										0.891516
				12.5						0.05	0
				14.1343										0.84174
				14.5						0.04	0
				16.5						0.04	0
				17.1734										0.772187
				18.5						0.06	0
				22.1934										0.954113
				22.5						0.07	0
				26.5						0.05	0.01
				29.0029										0.985866
				30.5						0.07	0
				34.5						0.05	0.01
				35.341										0.796622
				37.5956										0.907604
				38.5						0.05	0
				46.5						0.07	0
				46.6749										0.94994
				53.7413										0.951634
				54.5						0.05	0
				62.2991										1.10429
				62.5						0.05	0
				70.5						0.07	0.03
				71.3859										1.09642
				77.7028										1.04774
				78.5						0.05	0
