# Supplementary material for: Quantifying key drivers of marine pyrite burial flux and isotopic composition
Source: Research Square preprint supplement (doi:10.21203/rs.3.rs-4788953/v1), 2024-11-01
Supplement: Supplementary file 616 [file W2014_J.xlsx]

## Sheet: Sheet1
reference	latitude_dd	longitude_dd	water_depth_m	depth_cm	age_yr	porosity_vol_	SO4_mM	H2S_mM	CH4_mM	S_py_wt_	S_AVS_wt_	S0_wt_	TOC_wt_	Fe_HR_wt_	Fe_tot_wt_	d34S_SO4	d34S_H2S	d34S_py	lnSRR_molL_1d_1	lnMOR_molL_1d_1	sed_rate_cmky
Wehrmann2014	79.7138	11.085	214	0.696933			26.8668
				0.856712				0.0196915
				1.47601														-28.2105
				1.47679										0.61747
				1.5						0.02	0
				3.16456										0.747992
				3.29351			25.2964
				3.5						0.05	0.02
				3.98524														-28.6316
				5.06329										0.737952
				5.5						0.07	0.04
				6.34686														-33.2632
				7.173										0.888554
				7.5						0.09	0.06
				7.97048														-29.8947
				9.0297				0.0155533
				9.319			24.9241
				9.5						0.07	0.03
				10.1845														-32.4211
				10.9705										0.828313
				11.2598			24.4047
				11.5						0.09	0.04
				12.3985														-33.8947
				12.7678			24.147
				13.1158				0.0159331
				13.5						0.15	0.06
				13.5021										0.928715
				13.8745														-36
				15.5						0.09	0.08
				16.4557										0.828313
				16.5314														-38.5263
				17.5						0.11	0.06
				18.155														-35.3684
				19.5						0.13	0.05
				20.2532										0.758032
				20.369														-37.6842
				21.845														-37.8947
				22.1209				0.168607
				23.4177										0.768072
				23.5						0.12	0.06
				23.5471			21.554
				24.059														-38.3158
				24.2732				0.159011
				24.6369			20.1096
				25.9779														-36.6316
				27.2152										1.01908
				27.5						0.13	0.12
				28.1919														-40
				28.778				0.223103
				29.3681			20.1275
				30.4059														-38.1053
				30.8017										0.747992
				31.5						0.07	0.04
				31.9915				0.291973
				32.0295														-38.9474
				32.6099			18.5595
				34.2435														-38.9474
				34.5992										0.527108
				35.5						0.06	0.03
				36.31														-39.3684
				37.9336														-39.3684
				39.4515										0.828313
				39.5						0.1	0.06
				41.8545			18.8578
				42.214														-38.7368
				42.739				0.32236
				46.3469														-42.3158
				49.7417														-43.3684
				54.3173														-39.3684
