# Supplementary material for: Quantifying key drivers of marine pyrite burial flux and isotopic composition
Source: Research Square preprint supplement (doi:10.21203/rs.3.rs-4788953/v1), 2024-11-01
Supplement: Supplementary file 619 [file W2014_Q.xlsx]

## Sheet: Sheet1
reference	latitude_dd	longitude_dd	water_depth_m	depth_cm	age_yr	porosity_vol_	SO4_mM	H2S_mM	CH4_mM	S_py_wt_	S_AVS_wt_	S0_wt_	TOC_wt_	Fe_HR_wt_	Fe_tot_wt_	d34S_SO4	d34S_H2S	d34S_py	lnSRR_molL_1d_1	lnMOR_molL_1d_1	sed_rate_cmky
Wehrmann2014	79.9072	11.2978	48	0.960833										1.16991
				1						0	0
				1.52838			26.3766
				2.76848										0.899257
				3						0	0
				3.71179			27.3138
				4.43213														3.68421
				5						0.01	0
				5.24017			25.841
				6.04322										0.940203
				7						0.01	0
				8.31025														-4.52632
				8.95196			25.4393
				9						0.01	0
				10.0492										1.15201
				10.2493														-1.05263
				11						0.01	0
				13						0	0
				13.8393										1.12279
				13.9738			25.5732
				14.1274														-3.89474
				15						0	0
				16.3435														-3.89474
				16.5652										1.45477
				17						0.01	0
				17.6856			25.841
				18.0055														-7.36842
				18.8776										1.18424
				19						0.01	0
				20.2216														-2.94737
				20.3057			26.3766
				22.0524			24.3682
				22.4275										1.07465
				22.4377														2.10526
				23						0.01	0
				24.0175			24.636
				25.5459			22.7615
				26.3158														0.842105
				27						0.01	0
				27.2591										0.834845
				27.2926			26.5105
				28.5319														-5.15789
				29.476			25.9749
				30.4709														-1.36842
				30.4882										1.17698
				31						0.01	0
				32.687														0.210526
				33.6245			25.0377
				35						0.03	0
				35.1801														-0.421053
				35.3										1.0677
				36.5651														-5.78947
				37.5546			25.0377
				38.3178										1.1387
				38.5042														-2.31579
				39						0.02	0
				39.9563			25.5732
				43.4498			25.5732
				46.6612										1.0403
				46.8144														-3.26316
				47						0.02	0
				51.5284			25.1715
				54.5706														-9.57895
				55						0.02	0
				55.2373										1.07247
				59.8253			25.4393
				62.5667										1.00395
				62.6039														-9.89474
				63						0.02	0
				67.4673			25.5732
				70.6371														-9.89474
				71						0.02	0
				71.1381										1.06624
				75.7642			25.3054
				78.3933														-1.36842
				78.4675										0.99772
				79						0.03	0
				85.0292										0.999292
				86.9806														-4.52632
				87						0.01	0
				94.8716										1.00165
				95						0.02	0
				102.443										1.00347
				103						0.02	0
				110.765										1.04562
				111						0.02	0
				118.847										1.0074
				119						0.01	0
