# Supplementary material for: Quantifying key drivers of marine pyrite burial flux and isotopic composition
Source: Research Square preprint supplement (doi:10.21203/rs.3.rs-4788953/v1), 2024-11-01
Supplement: Supplementary file 622 [file W2014_T.xlsx]

## Sheet: Sheet1
reference	latitude_dd	longitude_dd	water_depth_m	depth_cm	age_yr	porosity_vol_	SO4_mM	H2S_mM	CH4_mM	S_py_wt_	S_AVS_wt_	S0_wt_	TOC_wt_	Fe_HR_wt_	Fe_tot_wt_	d34S_SO4	d34S_H2S	d34S_py	lnSRR_molL_1d_1	lnMOR_molL_1d_1	sed_rate_cmky
Wehrmann2014	78.9677	11.882	330	1						0.03	0
				1.14327										1.6318
				1.9337														-18.1053
				3						0.04	0
				3.03867														-24.1053
				3.31492														-29.4737
				4.97238														-25.0526
				4.97238														-27.5789
				5						0.04	0.02
				6.35359														-29.1579
				7						0.03	0.01
				7.05118										0.950484
				8.01105														-28.8421
				8.56354														-27.5789
				9						0.08	0.02
				9.94475														-35.4737
				10.3305										0.961311
				11						0.04	0.02
				11.0497														-34.2105
				11.8785														-35.7895
				12.5851										1.07229
				12.9834														-38
				13						0.05	0.02
				13.2597														-40.2105
				14.1176										0.952178
				15						0.05	0.01
				17						0.03	0.03
				18.6481										1.03358
				19						0.05	0.02
				21						0.07	0.02
				21.1824										0.963911
				22.4169										1.14493
				23						0.11	0.02
				25						0.08	0.01
				25.2021										1.08536
				26.9809										1.00546
				27						0.08	0.03
