# Supplementary material for: Quantifying key drivers of marine pyrite burial flux and isotopic composition
Source: Research Square preprint supplement (doi:10.21203/rs.3.rs-4788953/v1), 2024-11-01
Supplement: Supplementary file 625 [file WAST-T1.xlsx]

## Sheet: Sheet1
reference	latitude_dd	longitude_dd	water_depth_m	depth_cm	age_yr	porosity_vol_	SO4_mM	H2S_mM	CH4_mM	S_py_wt_	S_AVS_wt_	S0_wt_	TOC_wt_	Fe_HR_wt_	Fe_tot_wt_	d34S_SO4	d34S_H2S	d34S_py	lnSRR_molL_1d_1	ExtraVar1	sed_rate_cmky
Boettcher2000c	16.1686	59.7519	1918	0.283688									0.87799
				0.70922									0.662679
				1.20567									0.722488
				1.70213									0.69378
				2.19858									0.669856
				2.62411									0.751196
				3.75887									0.705742
				3.75887									0.688995
				4.1844									0.655502
				4.75177									0.784689
				5.53191									0.681818
				6.38298									0.722488
				7.44681									0.691388
				8.43972									0.631579
				9.57447									0.631579
				10.922									0.648325
				12.5532									0.382775
				15.3191									0.351675
				0.197179												20.4953
				1.14728												20.4951
				3.42024												20.5989
				5.43976												20.6022
				14.4651												20.5973
				16.9756												20.701
				0.25			29.3
				0.75			27.8
				1.5			28.3
				2.5			28.7
				3.5			28
				4.5			28.3
				5.5			27.4
				6.5			28.5
				7.5			27.5
				8.5			28.5
				9.5			29.1
				11.5			28.3
				14.5			28.7
				17
