# Supplementary material for: Quantifying key drivers of marine pyrite burial flux and isotopic composition
Source: Research Square preprint supplement (doi:10.21203/rs.3.rs-4788953/v1), 2024-11-01
Supplement: Supplementary file 628 [file WAST1.xlsx]

## Sheet: Sheet1
reference	latitude_dd	longitude_dd	water_depth_m	depth_cm	age_yr	porosity_vol_	SO4_mM	H2S_mM	CH4_mM	S_py_wt_	S_AVS_wt_	S0_wt_	TOC_wt_	Fe_HR_wt_	Fe_tot_wt_	d34S_SO4	d34S_H2S	d34S_py	lnSRR_molL_1d_1	ExtraVar1	sed_rate_cmky
Boettcher2000c	16.2167	60.2667	4045	2.26487												20.3898
				4.87895												20.3959
				10.0007												20.5041
				14.8864												20.4959
				19.7732												20.5014
				29.7656												20.4028
				40.1217												20.6054
				0.25			28.6
				0.75			28
				1.25			28.3
				1.75			27.3
				2.25			28.8
				2.75			27.8
				3.25			28.6
				3.75			27.9
				4.25			28.4
				4.75			28.7
				5.5			28.1
				6.5			27.9
				7.5			28.4
				8.5			28.7
				9.5			28.1
				11			28.9
				15			27.3
				17			28.2
				19
				21			27.6
				23			28.3
				27			27.2
				29			27
				33			27.6
				35			27.6
				39			25.2
				41			27.4
