# Supplementary material for: Quantifying key drivers of marine pyrite burial flux and isotopic composition
Source: Research Square preprint supplement (doi:10.21203/rs.3.rs-4788953/v1), 2024-11-01
Supplement: Supplementary file 634 [file Y1.xlsx]

## Sheet: Sheet1
reference	latitude_dd	longitude_dd	water_depth_m	depth_cm	age_yr	porosity_vol_	SO4_mM	H2S_mM	CH4_mM	S_py_wt_	S_AVS_wt_	S0_wt_	TOC_wt_	Fe_HR_wt_	Fe_tot_wt_	d34S_SO4	d34S_H2S	d34S_py	lnSRR_molL_1d_1	sed_rate_cmky
Antler2013	32.1021	34.8094	2	-0.387435			28.2122
				1.21144			24.33
				2.65777			16.8616
				5.49194			9.87468
				6.80351			8.56309
				8.26247			8.01742
				9.64891			7.72979
				11.0358			7.69857
				13.8077			6.61051
				15.2653			5.29564
				16.6517			5.00801
				22.2677			2.31746
				23.7266			1.77179
				26.5716			0.682089
				-0.194805												20.6897
				1.07143												24.1379
				2.62987												31.0345
				4.09091												40.5172
				5.55195												43.9655
				6.99939												51.7241
				9.64286												53.4483
				11.2013												53.4483
				13.9286												56.0345
				15.3896												59.4828
				16.8506												61.2069
				19.6753												62.069
				21.039												63.7931
				22.4026												67.2414
				23.7662												67.2414
