# Supplementary material for: Quantifying key drivers of marine pyrite burial flux and isotopic composition
Source: Research Square preprint supplement (doi:10.21203/rs.3.rs-4788953/v1), 2024-11-01
Supplement: Supplementary file 637 [file Y2.xlsx]

## Sheet: Sheet1
reference	latitude_dd	longitude_dd	water_depth_m	depth_cm	age_yr	porosity_vol_	SO4_mM	H2S_mM	CH4_mM	S_py_wt_	S_AVS_wt_	S0_wt_	TOC_wt_	Fe_HR_wt_	Fe_tot_wt_	d34S_SO4	d34S_H2S	d34S_py	lnSRR_molL_1d_1	sed_rate_cmky
Antler2013	32.1021	34.8094	2	-0.466513			24.8806
				0.479614			23.3209
				1.5708			21.245
				2.66151			18.9128
				3.75503			18.1189
				4.91874			15.785
				7.17831			13.9393
				0.487013												24.1379
				1.55844												29.3103
				2.53247												34.4828
				3.7987												36.2069
				4.96753												39.6552
				7.11039												43.1034
