# Supplementary material for: Quantifying key drivers of marine pyrite burial flux and isotopic composition
Source: Research Square preprint supplement (doi:10.21203/rs.3.rs-4788953/v1), 2024-11-01
Supplement: Supplementary file 640 [file Z2008_14.xlsx]

## Sheet: Sheet1
reference	latitude_dd	longitude_dd	water_depth_m	depth_cm	age_yr	porosity_vol_	SO4_mM	H2S_mM	CH4_mM	S_py_wt_	S_AVS_wt_	S0_wt_	TOC_wt_	Fe_HR_wt_	Fe_tot_wt_	d34S_SO4	d34S_H2S	d34S_py	lnSRR_molL_1d_1	lnMOR_molL_1d_1	sed_rate_cmky
Zopfi2008	-36.5336	-73.05	64	0.474924															0.00998094
				1.1039			29.4761	0.000746753
				1.46379															0.00902925
				2.50337															0.0105969
				3.07843			29.7929	0.000616883
				3.58658															0.0115343
				4.5781															0.0117637
				5.24671			28.729	0.000649351
				5.42225															0.00656106
				7.15525			28.9648	0.000649351
				8.1207															0.00465273
				9.13171			30.0121	0.00149351
				10.0567															0.0042457
				12.084															0.00431049
				13.1427			29.1844	0.00100649
				14.1092															0.00350915
				15.0521			29.7449	0.00149351
				16.0933															0.00444038
				17.0914			29.6556	0.00126623
				18.1186															0.00363904
				19.0651			29.6477	0.0012013
				20.0993															0.00307423
				21.0358			28.5034	0.00100649
