# Supplementary material for: Quantifying key drivers of marine pyrite burial flux and isotopic composition
Source: Research Square preprint supplement (doi:10.21203/rs.3.rs-4788953/v1), 2024-11-01
Supplement: Supplementary file 643 [file Z2008_18.xlsx]

## Sheet: Sheet1
reference	latitude_dd	longitude_dd	water_depth_m	depth_cm	age_yr	porosity_vol_	SO4_mM	H2S_mM	CH4_mM	S_py_wt_	S_AVS_wt_	S0_wt_	TOC_wt_	Fe_HR_wt_	Fe_tot_wt_	d34S_SO4	d34S_H2S	d34S_py	lnSRR_molL_1d_1	lnMOR_molL_1d_1	sed_rate_cmky
Zopfi2008	-36.5049	-73.1234	88	0.44843															0.0257647
				0.923483				0.00627063
				1.52466															0.0112941
				2.46637															0.00576471
				2.91005			31.2993	0.00858086
				3.63229															0.00552941
				4.43946															0.00482353
				4.89418			30.7237	0.0039604
				6.00897															0.00423529
				6.94444			30.2303	0.00759076
				7.93722															0.004
				8.92857			29.8191	0.00594059
				10															0.00564706
				10.9788			29.5724	0.00363036
				12.0179															0.00447059
				12.963			29.5724	0.00792079
				13.9462															0.00376471
				15.0794			29.3257	0.0039604
				16.0538															0.00341176
				16.9974			29.3257	0.0039604
				18.0269															0.00235294
				18.9815			28.6678	0.0019802
				20															0.002
				21.0979			28.8322	0.00957096
