# Supplementary material for: Quantifying key drivers of marine pyrite burial flux and isotopic composition
Source: Research Square preprint supplement (doi:10.21203/rs.3.rs-4788953/v1), 2024-11-01
Supplement: Supplementary file 646 [file Z2008_4.xlsx]

## Sheet: Sheet1
reference	latitude_dd	longitude_dd	water_depth_m	depth_cm	age_yr	porosity_vol_	SO4_mM	H2S_mM	CH4_mM	S_py_wt_	S_AVS_wt_	S0_wt_	TOC_wt_	Fe_HR_wt_	Fe_tot_wt_	d34S_SO4	d34S_H2S	d34S_py	lnSRR_molL_1d_1	lnMOR_molL_1d_1	sed_rate_cmky
Zopfi2008	-36.6356	-73.0342	24	0.388001															0.0868716
				0.896414			26.2879	2.10033
				1.50545															0.109407
				2.49069															0.117563
				2.92165			26.4983	2.80936
				3.48557															0.0657181
				4.6535															0.0532544
				4.91368			22.5421	3.30435
				6.49447															0.0383117
				6.97211			23.2997	2.23411
				7.9773															0.0196078
				8.96414			24.3939	0.869565
				9.95088															0.0165444
				10.8898			24.9832	0.254181
				12.0583															0.0178603
				12.8818			25.7407	0.120401
				13.9882															0.00729547
				14.9402			26.5825	0.107023
				16.0514															0.00485991
				17.0651			26.4141	0.0241414
