# Supplementary material for: Quantifying key drivers of marine pyrite burial flux and isotopic composition
Source: Research Square preprint supplement (doi:10.21203/rs.3.rs-4788953/v1), 2024-11-01
Supplement: Supplementary file 649 [file Z2008_7.xlsx]

## Sheet: Sheet1
reference	latitude_dd	longitude_dd	water_depth_m	depth_cm	age_yr	porosity_vol_	SO4_mM	H2S_mM	CH4_mM	S_py_wt_	S_AVS_wt_	S0_wt_	TOC_wt_	Fe_HR_wt_	Fe_tot_wt_	d34S_SO4	d34S_H2S	d34S_py	lnSRR_molL_1d_1	lnMOR_molL_1d_1	sed_rate_cmky
Zopfi2008	-36.1014	-73.0017	32	0.541761															0.0584397
				0.857788															0.021844
				0.859788			29.4079	0.00281046
				1.78571			31.7928	0.00101307
				2.39278															0.0326241
				2.77778			29.7368	0.000425
				3.4763															0.0496454
				3.90212			30.8059	0.000621
				4.37923															0.0365957
				5.02646			30.3947	3.27e-05
				5.82011			30.6414	3.27e-05
				5.95937															0.026383
				6.94444			30.3125	0.000458
				8.03612															0.0175887
				8.99471			30.477	0.000229
				9.98677			31.5241	0.000261
				10.0226															0.0130496
				10.7804			31.3816	0.000229
				12.009															0.00794326
				12.037			32.0395	3.27e-05
				13.9503															0.00652482
				16.0722															0.00624113
				18.0135															0.0070922
				20.0451															0.00510638
